# Supplementary material for: Shenkang Injection for Treating Renal Fibrosis-Metabonomics and Regulation of E3 Ubiquitin Ligase Smurfs on TGF-β/Smads Signal Transduction
Source: Front Pharmacol. 2022 Jun 2;13:849832. doi: 10.3389/fphar.2022.849832 (PMC9201572; doi:10.3389/fphar.2022.849832)
Supplement: Supplementary file 1 [file Table2.XLSX]

## Sheet: Sheet1
	24H				48H				72H
CON	0.303	0.328	0.317	0.311	0.678	0.703	0.741	0.706	0.836	0.831	0.911	0.828	od values
1:10	0.074	0.081	0.078	0.083	0.075	0.075	0.078	0.082	0.067	0.072	0.075	0.082
1:20	0.062	0.069	0.068	0.077	0.066	0.068	0.067	0.073	0.061	0.063	0.069	0.071
1:40	0.308	0.331	0.301	0.316	0.738	0.726	0.67	0.692	0.592	0.711	0.647	0.627
1:80	0.31	0.317	0.334	0.332	0.794	0.783	0.782	0.813	0.91	0.925	1.036	1.114
1:100	0.328	0.325	0.326	0.316	0.783	0.824	0.822	0.805	0.806	0.852	0.965	0.923
1:200	0.307	0.295	0.304	0.293	0.723	0.759	0.792	0.789	0.906	0.957	0.961	1.012
1:400	0.286	0.292	0.304	0.315	0.696	0.688	0.695	0.705	0.844	0.85	0.808	0.867
1:800	0.29	0.311	0.312	0.306	0.658	0.659	0.674	0.627	0.82	0.803	0.848	0.773
1:1000	0.32	0.325	0.315	0.291	0.696	0.688	0.669	0.648	1.093	1.017	0.954	0.957
1:10000	0.313	0.336	0.321	0.318	0.707	0.724	0.678	0.674	1.082	1.118	1.142	0.967
1:100000	0.316	0.324	0.33	0.319	0.648	0.695	0.652	0.651	1.152	1.093	1.131	1.135
