# Supplementary material for: Shenkang Injection for Treating Renal Fibrosis-Metabonomics and Regulation of E3 Ubiquitin Ligase Smurfs on TGF-β/Smads Signal Transduction
Source: Front Pharmacol. 2022 Jun 2;13:849832. doi: 10.3389/fphar.2022.849832 (PMC9201572; doi:10.3389/fphar.2022.849832)
Supplement: Supplementary file 2 [file Table3.XLSX]

## Sheet: Sheet1
Compound_ID	Name	Other_name(Kegg_name)	Formula	Molecular Weight	RT [min]	Kegg_ID	KEGG_pathway	HMDB_ID	Lipidmaps_ID	SuperClass(HMDB)	Class(HMDB)	SubClass(HMDB)	CATEGORY(Lipidmaps)	MAIN_CLASS(Lipidmaps)	SUB_CLASS(Lipidmaps)	mzCloud_Results	mzVault_Results	MassList_Results	neg_UUO1	neg_UUO2	neg_UUO3	neg_UUO4	neg_UUO5	neg_UUO6	neg_SKI_H1	neg_SKI_H2	neg_SKI_H3	neg_SKI_H4	neg_SKI_H5	neg_SKI_H6	FC	log2FC	Pvalue	ROC	VIP	Up.Down
Com_3038_neg	Gibberellin A4	Gibberellin A4	C19 H24 O5	332.163	8.626	cpd:C11864	--	--	LMPR0104170021	--	--	--	Prenol Lipids [PR]	Isoprenoids [PR01]	C20 isoprenoids (diterpenes) [PR0104]	Full match	No results	No results	27670.6	26582.8	26915.5	23754	25899	25051.9	2.58786e+06	2.61702e+06	2.67119e+06	2.8256e+06	2.65797e+06	2.73521e+06	0.0096847	-6.69008	9.82e-16	1	1.83786	down
Com_3096_neg	2-[(1H-1,2,4-triazol-3-ylimino)methyl]phenol	--	C9 H8 N4 O	188.072	9.849	--	--	--	--	--	--	--	--	--	--	Invalid mass	No results	No results	22901.8	24791.1	21779.1	20210.7	20587.3	20968.9	2.15752e+06	2.18201e+06	2.76853e+06	2.85236e+06	2.19254e+06	2.904e+06	0.00871617	-6.84209	6.7e-12	1	1.84205	down
Com_543_neg	L-Glutamic acid	L-Glutamate; L-Glutamic acid; L-Glutaminic acid; Glutamate	C5 H9 N O4	147.053	1.2	cpd:C00025	map00220 Arginine biosynthesis;map00250 Alanine, aspartate and glutamate metabolism;map00330 Arginine and proline metabolism;map00340 Histidine metabolism;map00430 Taurine and hypotaurine metabolism;map00471 D-Glutamine and D-glutamate metabolism;map00480 Glutathione metabolism;map00524 Neomycin, kanamycin and gentamicin biosynthesis;map00630 Glyoxylate and dicarboxylate metabolism;map00650 Butan…	HMDB0000148	--	Organic acids and derivatives	Carboxylic acids and derivatives	Amino acids, peptides, and analogues	--	--	--	Full match	Full match	Full match	5.37293e+07	4.76232e+07	4.62236e+07	4.81448e+07	4.94389e+07	4.70522e+07	3.20364e+07	3.18219e+07	3.19927e+07	2.98644e+07	3.15047e+07	3.38493e+07	1.52935	0.612918	6.21e-08	1	1.83048	up
Com_3593_neg	N1-[4-(cyanomethyl)phenyl]-4-chlorobenzamide	--	C15 H11 Cl N2 O	270.053	10.871	--	--	--	--	--	--	--	--	--	--	Invalid mass	No results	No results	3.46375e+06	3.2078e+06	3.21402e+06	3.02297e+06	3.46859e+06	3.05801e+06	758525	743729	927670	1.01132e+06	742246	1.01906e+06	3.73569	1.90138	5.55e-07	1	1.55994	up
Com_6557_neg	delta-Tocopherol	delta-Tocopherol	C27 H46 O2	402.35	16.483	cpd:C14151	map00130 Ubiquinone and other terpenoid-quinone biosynthesis;map01100 Metabolic pathways	HMDB0002902	LMPR02020066	Lipids and lipid-like molecules	Prenol lipids	Quinone and hydroquinone lipids	Prenol Lipids [PR]	Quinones and hydroquinones [PR02]	Vitamin E [PR0202]	No results	No results	Full match	900473	662322	555084	577152	890846	623878	147223	263313	259258	264044	165378	142207	3.39107	1.76174	1.98e-05	1	1.91934	up
Com_1610_neg	(±)9-HpODE	--	C18 H32 O4	294.22	12.94	--	--	--	--	--	--	--	--	--	--	Invalid mass	No results	No match	8.22096e+06	1.06646e+07	1.31874e+07	8.23389e+06	9.77552e+06	9.12584e+06	4.28069e+06	3.78978e+06	4.50117e+06	4.78866e+06	4.11224e+06	4.41387e+06	2.28723	1.1936	2.07e-05	1	1.93878	up
Com_2073_neg	4-(octyloxy)benzoic acid	--	C15 H22 O3	250.157	11.523	--	--	--	--	--	--	--	--	--	--	Full match	No results	No results	908658	1.81881e+06	2.59366e+06	992739	1.37043e+06	1.93171e+06	7.75517e+06	6.89652e+06	7.37735e+06	7.91747e+06	8.27144e+06	4.21552e+06	0.226614	-2.14169	4.15e-05	1	1.53169	down
Com_4331_neg	(5ξ,9ξ)-17-Hydroxykaur-15-en-19-oic acid	--	C20 H30 O3	318.22	11.66	--	--	--	--	--	--	--	--	--	--	Full match	No results	No results	2.46452e+06	2.43838e+06	2.20809e+06	1.46673e+06	2.44855e+06	1.7094e+06	1.0136e+06	918092	859413	883212	963522	793820	2.34471	1.22941	8.67e-05	1	1.562	up
Com_3094_neg	N-(1,1-Dioxotetrahydro-1H-1λ6-thiophen-3-yl)-4-methoxybenzamide	--	C12 H15 N O4 S	269.073	9.631	--	--	--	--	--	--	--	--	--	--	Full match	No results	No results	4.24669e+06	4.23089e+06	4.35757e+06	1.26127e+06	4.54979e+06	2.87365e+06	474301	510834	745108	785966	461805	771662	5.73913	2.52083	0.000110785	1	1.93854	up
Com_1700_neg	(2S)-4-Oxo-2-phenyl-3,4-dihydro-2H-chromen-7-yl beta-D-glucopyranoside	--	C21 H22 O8	448.142	12.487	--	--	--	--	--	--	--	--	--	--	Invalid mass	No results	No results	3.49831e+06	3.51385e+06	4.13221e+06	2.05123e+06	3.89361e+06	3.27005e+06	7.04383e+06	5.3984e+06	7.70948e+06	9.19113e+06	6.38431e+06	1.24303e+07	0.422764	-1.24207	0.000333591	1	2.42193	down
Com_4764_neg	Orotic Acid	Orotate; Orotic acid; Uracil-6-carboxylic acid	C5 H4 N2 O4	156.017	1.331	cpd:C00295	map00240 Pyrimidine metabolism;map01100 Metabolic pathways	HMDB0000226	--	Organoheterocyclic compounds	Diazines	Pyrimidines and pyrimidine derivatives	--	--	--	No results	No results	Full match	1.48004e+06	2.01685e+06	1.32802e+06	1.28717e+06	1.88266e+06	1.3397e+06	563478	957744	902147	954403	858512	885766	1.8224	0.865841	0.00036951	1	2.01822	up
Com_1102_neg	Aspartate	Aspartate; Aspartic acid	C4 H7 N O4	133.037	1.201	cpd:C16433	--	HMDB0000191	--	Organic acids and derivatives	Carboxylic acids and derivatives	Amino acids, peptides, and analogues	--	--	--	No results	No results	Full match	1.27326e+07	1.38942e+07	1.42745e+07	2.03414e+07	1.40455e+07	1.84174e+07	8.92802e+06	8.29711e+06	1.02537e+07	1.0155e+07	8.66516e+06	9.96489e+06	1.66546	0.735922	0.000493843	1	2.00511	up
Com_2234_neg	PC (2:0/18:3)	--	C28 H50 N O8 P	619.349	13.55	--	--	--	--	--	--	--	--	--	--	No results	Invalid mass	No results	4.22081e+06	7.48401e+06	8.00758e+06	6.35544e+06	5.83756e+06	6.84351e+06	3.83491e+06	3.96368e+06	3.08994e+06	3.03879e+06	3.88699e+06	3.32788e+06	1.83278	0.874031	0.000603454	1	1.62027	up
Com_2706_neg	FAHFA (16:1/18:3)	--	C34 H58 O4	530.432	14.237	--	--	--	--	--	--	--	--	--	--	No results	Full match	No results	940475	996105	867779	1.46187e+06	1.16573e+06	1.42026e+06	2.39319e+06	2.15136e+06	2.13597e+06	2.91483e+06	1.40772e+06	2.14775e+06	0.521049	-0.94051	0.000613756	0.944444	1.36633	down
Com_267_neg	(+/-)12(13)-DiHOME	--	C18 H34 O4	296.235	13.238	--	--	--	--	--	--	--	--	--	--	Invalid mass	No results	No results	6.19766e+07	9.38951e+07	1.23613e+08	6.66431e+07	7.90016e+07	9.79463e+07	3.93283e+07	3.89897e+07	4.01865e+07	4.41891e+07	3.70065e+07	4.26018e+07	2.15878	1.11021	0.000640841	1	1.91085	up
Com_1747_neg	N-[4-(diethylamino)phenyl]-N'-phenylurea	--	C17 H21 N3 O	284.172	2.256	--	--	--	--	--	--	--	--	--	--	Invalid mass	No results	No results	7.50713e+06	6.50717e+06	6.21805e+06	9.70746e+06	8.01847e+06	7.44976e+06	4.33591e+06	4.28777e+06	5.30438e+06	6.06605e+06	4.80584e+06	5.38429e+06	1.50436	0.589153	0.000832154	1	1.65266	up
Com_1097_neg	13(S)-HOTrE	13(S)-HOT; (9Z,11E,15Z)-(13S)-Hydroxyoctadeca-9,11,15-trienoate; (9Z,11E,15Z)-(13S)-13-Hydroxyoctadeca-9,11,15-trienoic acid; (9Z,11E,13S,15Z)-13-Hydroxyoctadeca-9,11,15-trienoic acid; 13(S)-HOTrE	C18 H30 O3	294.22	13.161	cpd:C16316	map00592 alpha-Linolenic acid metabolism	--	--	--	--	--	--	--	--	Full match	No results	Full match	9.23016e+06	1.66167e+07	2.22964e+07	1.22421e+07	1.33389e+07	1.77132e+07	6.53033e+06	6.58585e+06	5.99799e+06	7.39839e+06	6.85444e+06	7.08164e+06	2.26058	1.17669	0.0013073	1	1.82063	up
Com_4620_neg	ethyl 2-cyano-3-(tetrahydro-3-thiophenylamino)acrylate	--	C10 H14 N2 O2 S	226.079	11.084	--	--	--	--	--	--	--	--	--	--	Invalid mass	No results	No results	174973	168901	24341.9	43352.1	165968	41866.1	1.088e+06	388433	596383	333270	817020	521674	0.165404	-2.59593	0.00140888	1	1.30166	down
Com_218_neg	Ascorbic acid	Ascorbate; Ascorbic acid; L-Ascorbate; L-Ascorbic acid; Vitamin C	C6 H8 O6	130.026	1.249	cpd:C00072	map00053 Ascorbate and aldarate metabolism;map00480 Glutathione metabolism;map01100 Metabolic pathways;map04066 HIF-1 signaling pathway;map04977 Vitamin digestion and absorption	HMDB0000044	--	Organoheterocyclic compounds	Dihydrofurans	Furanones	--	--	--	Invalid mass	No results	No match	4.25698e+07	4.7671e+07	3.91768e+07	7.44883e+07	3.7015e+07	5.47196e+07	9.27197e+07	8.37021e+07	8.7937e+07	7.75831e+07	9.62669e+07	7.3869e+07	0.577335	-0.792518	0.00178768	0.972222	1.47344	down
Com_2206_neg	Adenosine diphosphate ribose	ADP-ribose; ADP-D-ribose; Adenosine diphosphate ribose	C15 H23 N5 O14 P2	559.072	1.169	cpd:C00301	map00230 Purine metabolism	HMDB0001178	--	Nucleosides, nucleotides, and analogues	Purine nucleotides	Purine nucleotide sugars	--	--	--	Full match	No results	Full match	8.39773e+06	6.45939e+06	3.93959e+06	6.01061e+06	7.23083e+06	5.65062e+06	818370	1.04248e+06	2.63389e+06	2.63981e+06	840732	3.13242e+06	3.39303	1.76257	0.00215634	1	1.7421	up
Com_486_neg	LPC 17:1	--	C25 H50 N O7 P	585.365	14.671	--	--	--	LMGP01050126	--	--	--	Glycerophospholipids [GP]	Glycerophosphocholines [GP01]	Monoacylglycerophosphocholines [GP0105]	No results	Invalid mass	No results	5.21765e+07	5.01658e+07	6.13068e+07	3.3946e+07	4.75702e+07	4.5595e+07	2.72009e+07	2.66437e+07	2.50399e+07	3.39268e+07	3.40942e+07	4.01211e+07	1.55465	0.636586	0.00246827	0.944444	1.79458	up
Com_3389_neg	PG (16:0/18:2)	--	C40 H75 O10 P	746.511	16.151	--	--	--	--	--	--	--	--	--	--	No results	Full match	No results	1.43584e+06	1.20331e+06	1.00282e+06	1.74615e+06	1.54011e+06	1.33998e+06	2.41715e+06	2.3598e+06	2.63675e+06	2.426e+06	2.03204e+06	1.44674e+06	0.620807	-0.687783	0.00268934	0.944444	1.3046	down
Com_6182_neg	9,10-Dihome	--	C18 H34 O4	314.246	12.352	--	--	HMDB0031679	LMFA02000229	Lipids and lipid-like molecules	Fatty Acyls	Fatty acids and conjugates	Fatty Acyls [FA]	Octadecanoids [FA02]	Other Octadecanoids [FA0200]	No results	No results	Full match	1.01896e+06	1.05483e+06	734303	538456	1.07541e+06	688537	511027	500720	430041	447947	458963	408841	1.85328	0.890081	0.00296608	1	1.75026	up
Com_3850_neg	Thromboxane B1	--	C20 H36 O6	354.241	11.933	--	--	--	LMFA03030008	--	--	--	Fatty Acyls [FA]	Eicosanoids [FA03]	Thromboxanes [FA0303]	Invalid mass	No results	No match	1.39319e+06	2.20519e+06	3.1605e+06	1.34203e+06	1.90646e+06	2.16533e+06	847246	1.06424e+06	1.06916e+06	1.12841e+06	1.00315e+06	1.15598e+06	1.94198	0.95753	0.0037073	1	1.99836	up
Com_1487_neg	(±)12(13)-DiHOME	--	C18 H34 O4	314.246	12.732	--	--	--	--	--	--	--	--	--	--	Full match	Full match	Full match	9.04988e+06	1.11036e+07	1.4885e+07	4.4443e+06	1.2261e+07	9.98948e+06	3.76317e+06	4.12922e+06	4.23175e+06	4.4488e+06	4.12096e+06	3.9594e+06	2.50405	1.32426	0.00377358	0.972222	1.78499	up
Com_293_neg	LPC 14:0	--	C22 H46 N O7 P	527.322	14.268	--	--	--	LMGP01050073	--	--	--	Glycerophospholipids [GP]	Glycerophosphocholines [GP01]	Monoacylglycerophosphocholines [GP0105]	No results	Invalid mass	No results	7.50875e+07	9.75834e+07	1.12571e+08	5.99482e+07	8.23998e+07	8.84322e+07	5.70437e+07	5.7849e+07	5.53769e+07	5.40908e+07	5.62111e+07	5.25743e+07	1.54894	0.631278	0.00492401	1	1.84678	up
Com_49_neg	LPE 22:6	--	C27 H44 N O7 P	525.286	14.465	--	--	--	LMGP02050060	--	--	--	Glycerophospholipids [GP]	Glycerophosphoethanolamines [GP02]	Monoacylglycerophosphoethanolamines [GP0205]	No results	Full match	No results	3.98826e+08	4.04513e+08	4.16565e+08	8.03455e+08	408695468	5.955e+08	8.73913e+08	818819830	8.35022e+08	8.46182e+08	8.57894e+08	7.87616e+08	0.603165	-0.729375	0.00565795	0.972222	1.83728	down
Com_4958_neg	6β-Prostaglandin I1	--	C20 H34 O5	354.241	11.482	--	--	--	--	--	--	--	--	--	--	Full match	No results	Full match	1.15039e+06	1.57783e+06	1.93199e+06	834956	1.38816e+06	1.41927e+06	891110	824698	697851	746745	904186	772619	1.7164	0.779389	0.00574255	0.944444	1.80831	up
Com_896_neg	D-Glucose 6-phosphate	D-Glucose 6-phosphate; Glucose 6-phosphate; Robison ester	C6 H13 O9 P	260.03	1.18	cpd:C00092	map00500 Starch and sucrose metabolism;map00524 Neomycin, kanamycin and gentamicin biosynthesis;map00562 Inositol phosphate metabolism;map01100 Metabolic pathways;map04911 Insulin secretion;map04917 Prolactin signaling pathway;map04918 Thyroid hormone synthesis;map04931 Insulin resistance;map04973 Carbohydrate digestion and absorption;map05230 Central carbon metabolism in cancer	HMDB0001401	--	Organic oxygen compounds	Organooxygen compounds	Carbohydrates and carbohydrate conjugates	--	--	--	Full match	Not the top hit	Full match	2.62193e+07	2.65933e+07	3.0031e+07	1.47035e+07	2.67847e+07	2.19228e+07	1.58004e+07	1.50623e+07	1.40724e+07	1.31703e+07	1.61701e+07	1.66867e+07	1.60786	0.685143	0.00597516	0.888889	1.72131	up
Com_609_neg	gamma-Nonanolactone	--	C9 H16 O2	156.115	11.087	--	--	--	--	--	--	--	--	--	--	No results	No results	Full match	3.66787e+06	6.2969e+06	8.68503e+06	1.18208e+07	5.4038e+06	9.60656e+06	1.3571e+07	1.32209e+07	1.64834e+07	1.66405e+07	1.36052e+07	1.68907e+07	0.503044	-0.991245	0.00654994	1	1.19238	down
Com_2027_neg	D-Sedoheptulose 7-phosphate	Sedoheptulose 7-phosphate; D-Sedoheptulose 7-phosphate; D-altro-Heptulose 7-phosphate; altro-Heptulose 7-phosphate	C7 H15 O10 P	290.04	1.182	cpd:C05382	map00030 Pentose phosphate pathway;map01100 Metabolic pathways;map01200 Carbon metabolism;map01230 Biosynthesis of amino acids	HMDB0001068	--	Organic oxygen compounds	Organooxygen compounds	Carbohydrates and carbohydrate conjugates	--	--	--	Full match	Full match	No results	3.93857e+06	6.30471e+06	9.2565e+06	3.63642e+06	5.32199e+06	6.26883e+06	2.90397e+06	3.41506e+06	2.64226e+06	2.47171e+06	3.86911e+06	3.61456e+06	1.83579	0.876401	0.00762521	0.972222	1.53785	up
Com_138_neg	N-Acetylphenylalanine	--	C11 H13 N O3	207.09	8.166	--	--	HMDB0000512	--	Organic acids and derivatives	Carboxylic acids and derivatives	Amino acids, peptides, and analogues	--	--	--	No results	No results	Full match	270607793	2.25832e+08	2.00071e+08	7.77755e+07	2.68866e+08	1.47286e+08	9.49032e+07	9.62663e+07	7.8087e+07	8.70487e+07	9.82857e+07	6.6017e+07	2.28663	1.19322	0.00993498	0.861111	1.4978	up
Com_292_neg	PE (16:0/22:6)	--	C43 H74 N O8 P	763.517	16.328	--	--	--	LMGP02010095	--	--	--	Glycerophospholipids [GP]	Glycerophosphoethanolamines [GP02]	Diacylglycerophosphoethanolamines [GP0201]	No results	Full match	No results	2.51299e+07	1.96101e+07	1.55445e+07	6.69213e+06	3.46791e+07	1.47271e+07	4.86415e+07	4.02691e+07	4.46197e+07	4.38769e+07	2.85376e+07	3.99677e+07	0.473269	-1.07927	0.0120803	0.972222	1.47846	down
Com_6150_neg	19(R)-Hydroxy-prostaglandin E2	--	C20 H32 O6	350.21	9.734	--	--	HMDB0001908	LMFA03010024	Lipids and lipid-like molecules	Fatty Acyls	Eicosanoids	Fatty Acyls [FA]	Eicosanoids [FA03]	Prostaglandins [FA0301]	Invalid mass	No results	No results	1.07442e+06	986919	945533	241293	1.09591e+06	623310	303806	291520	297762	354203	253740	330972	2.71145	1.43906	0.0129169	0.833333	1.46853	up
Com_2137_neg	L-Asparagine	L-Asparagine; 2-Aminosuccinamic acid	C4 H8 N2 O3	132.053	1.246	cpd:C00152	map00250 Alanine, aspartate and glutamate metabolism;map00970 Aminoacyl-tRNA biosynthesis;map01100 Metabolic pathways;map01230 Biosynthesis of amino acids;map04974 Protein digestion and absorption;map04978 Mineral absorption;map05230 Central carbon metabolism in cancer	HMDB0000168	--	Organic acids and derivatives	Carboxylic acids and derivatives	Amino acids, peptides, and analogues	--	--	--	No results	No results	Full match	8.8586e+06	4.07593e+06	3.80182e+06	5.57139e+06	5.1875e+06	4.15996e+06	3.11229e+06	2.65811e+06	3.63691e+06	2.91477e+06	3.24183e+06	3.65812e+06	1.64682	0.719681	0.0135609	1	1.69025	up
Com_5961_neg	Propionyl-L-carnitine	--	C10 H19 N O4	217.132	9.225	--	--	HMDB0000824	--	Lipids and lipid-like molecules	Fatty Acyls	Fatty acid esters	--	--	--	No results	No results	Full match	151133	165567	246522	666194	175513	468899	688967	674803	600296	644784	687873	637822	0.47625	-1.07021	0.0149834	0.916667	1.59473	down
Com_6180_neg	4-(3-Hydroxybutyl)phenyl β-D-glucopyranoside	--	C16 H24 O7	374.158	10.405	--	--	--	--	--	--	--	--	--	--	Invalid mass	No results	No results	318484	742044	1.10997e+06	526803	536659	789211	287333	314204	367679	370125	301268	432046	1.94107	0.956853	0.0169806	0.916667	1.25184	up
Com_399_neg	LPE 20:3	--	C25 H46 N O7 P	503.302	14.713	--	--	--	LMGP02050066	--	--	--	Glycerophospholipids [GP]	Glycerophosphoethanolamines [GP02]	Monoacylglycerophosphoethanolamines [GP0205]	No results	Full match	No results	2.89406e+07	2.64303e+07	2.26794e+07	5.85511e+07	2.99485e+07	3.76638e+07	5.0932e+07	5.19959e+07	5.30094e+07	5.07373e+07	5.40813e+07	5.13027e+07	0.654408	-0.611738	0.017669	0.833333	1.78349	down
Com_4158_neg	LPE 15:0	--	C20 H42 N O7 P	439.27	14.492	--	--	--	LMGP02050035	--	--	--	Glycerophospholipids [GP]	Glycerophosphoethanolamines [GP02]	Monoacylglycerophosphoethanolamines [GP0205]	No results	Full match	No results	1.11652e+06	2.01365e+06	2.72383e+06	1.09436e+06	1.4975e+06	1.85779e+06	974834	1.03636e+06	979004	926663	937776	1.15269e+06	1.71518	0.77836	0.0190277	0.944444	1.51842	up
Com_5658_neg	Indoleacetic acid	Indole-3-acetate; Indole-3-acetic acid; (Indol-3-yl)acetate; Indoleacetate; Indoleacetic acid; IAA	C10 H9 N O2	175.063	6.207	cpd:C00954	map00380 Tryptophan metabolism;map01100 Metabolic pathways	HMDB0000197	--	Organoheterocyclic compounds	Indoles and derivatives	Indolyl carboxylic acids and derivatives	--	--	--	No results	No results	Full match	1.48258e+06	1.25184e+06	834703	577747	1.02176e+06	709569	547900	577104	613300	567086	576209	579068	1.69858	0.764326	0.0208936	0.944444	1.42234	up
Com_1004_neg	LPC 15:0	--	C23 H48 N O7 P	541.339	14.401	--	--	--	LMGP01050016	--	--	--	Glycerophospholipids [GP]	Glycerophosphocholines [GP01]	Monoacylglycerophosphocholines [GP0105]	No results	Invalid mass	No results	7.03699e+06	1.64582e+07	2.57384e+07	9.51721e+06	1.08734e+07	1.65087e+07	7.54181e+06	7.62066e+06	7.1259e+06	6.29144e+06	6.98647e+06	6.56365e+06	2.04446	1.03172	0.020924	0.916667	1.60076	up
Com_545_neg	2-Hydroxycaproic acid	--	C6 H12 O3	132.079	3.658	--	--	HMDB0001624	--	Lipids and lipid-like molecules	Fatty Acyls	Fatty acids and conjugates	--	--	--	Full match	Full match	Full match	2.66639e+07	4.14134e+07	5.21686e+07	1.7272e+07	3.56869e+07	3.6681e+07	1.98166e+07	1.86836e+07	1.79793e+07	2.25596e+07	2.05619e+07	2.15039e+07	1.73309	0.793346	0.0243968	0.833333	1.45823	up
Com_4048_neg	Fexofenadine	Fexofenadine; 4-(1-Hydroxy-4-(4-(hydroxydiphenylmethyl)-1-piperidinyl)butyl)-alpha,alpha-dimethylbenzeneacetic acid	C32 H39 N O4	501.286	15.087	cpd:C06999	map04976 Bile secretion	HMDB0005030	--	Benzenoids	Benzene and substituted derivatives	Diphenylmethanes	--	--	--	No results	No results	Full match	720856	585210	586298	1.40673e+06	501905	880721	1.11758e+06	1.22559e+06	1.19683e+06	1.33261e+06	1.06156e+06	1.114e+06	0.664246	-0.59021	0.026835	0.833333	1.47219	down
Com_558_neg	PE (16:0/20:4)	--	C41 H74 N O8 P	739.517	16.566	--	--	--	LMGP02010096	--	--	--	Glycerophospholipids [GP]	Glycerophosphoethanolamines [GP02]	Diacylglycerophosphoethanolamines [GP0201]	No results	Full match	No results	1.3592e+07	1.19944e+07	7.74952e+06	3.65874e+06	1.43415e+07	1.13634e+07	2.05205e+07	1.91838e+07	1.80842e+07	1.88888e+07	1.84328e+07	1.33829e+07	0.577913	-0.791075	0.029303	0.944444	1.20932	down
Com_1047_neg	Hexanoylglycine	--	C8 H15 N O3	173.105	8.034	--	--	HMDB0000701	--	Organic acids and derivatives	Carboxylic acids and derivatives	Amino acids, peptides, and analogues	--	--	--	Full match	No results	No results	1.54576e+06	2.4639e+06	3.13973e+06	1.40115e+07	2.03644e+06	8.31538e+06	1.24398e+07	9.86494e+06	1.01198e+07	1.01803e+07	1.20691e+07	1.04438e+07	0.483934	-1.04712	0.0301813	0.833333	1.51716	down
Com_470_neg	Erythronolactone	--	C4 H6 O4	118.027	1.202	--	--	--	--	--	--	--	--	--	--	No results	Full match	Full match	6.50244e+07	3.98655e+07	2.00472e+07	1.66575e+07	5.38616e+07	1.92518e+07	1.6976e+07	1.61194e+07	1.42997e+07	1.40254e+07	1.8251e+07	1.33928e+07	2.30709	1.20608	0.0320306	0.944444	1.33621	up
Com_768_neg	Succinic Acid	Succinate; Succinic acid; Butanedionic acid; Ethylenesuccinic acid	C4 H6 O4	118.026	1.272	cpd:C00042	map00020 Citrate cycle (TCA cycle);map00190 Oxidative phosphorylation;map00250 Alanine, aspartate and glutamate metabolism;map00350 Tyrosine metabolism;map00360 Phenylalanine metabolism;map00620 Pyruvate metabolism;map00630 Glyoxylate and dicarboxylate metabolism;map00640 Propanoate metabolism;map00650 Butanoate metabolism;map00760 Nicotinate and nicotinamide metabolism;map00920 Sulfur metabolism	HMDB0000254	LMFA01170043	Organic acids and derivatives	Carboxylic acids and derivatives	Dicarboxylic acids and derivatives	Fatty Acyls [FA]	Fatty Acids and Conjugates [FA01]	Dicarboxylic acids [FA0117]	No results	No results	Full match	3.73718e+07	1.70782e+07	1.1084e+07	9.20994e+06	1.61945e+07	1.12833e+07	9.81301e+06	6.67382e+06	8.1319e+06	8.19984e+06	9.3474e+06	8.73367e+06	2.0083	1.00597	0.0350478	0.944444	1.11318	up
Com_2488_neg	L-(-)-3-Phenyllactic acid	--	C9 H10 O3	166.063	6.022	--	--	HMDB0000563	--	Phenylpropanoids and polyketides	Phenylpropanoic acids	_	--	--	--	Full match	No results	Full match	2.69794e+06	6.50416e+06	5.92177e+06	3.0316e+06	3.65045e+06	4.80873e+06	2.87082e+06	2.92076e+06	3.52076e+06	2.98639e+06	2.77249e+06	1.79143e+06	1.57832	0.658389	0.0396487	0.833333	1.16856	up
Com_6950_neg	Equol	Equol	C15 H14 O3	242.094	9.395	cpd:C14131	--	HMDB0141948	LMPK12080003	Phenylpropanoids and polyketides	Isoflavonoids	O-methylated isoflavonoids	Polyketides [PK]	Flavonoids [PK12]	Isoflavans [PK1208]	Full match	No results	Full match	763754	458976	246586	482180	627790	317589	269696	323801	269082	270565	268704	293144	1.70908	0.773219	0.0405363	0.805556	1.31554	up
Com_571_neg	5-amino-1-phenyl-1H-pyrazole-4-carbonitrile	--	C10 H8 N4	184.074	6.186	--	--	--	--	--	--	--	--	--	--	Invalid mass	No results	No results	2.60573e+07	3.03949e+07	1.15302e+07	2.12075e+07	2.69833e+07	1.43078e+07	8.57551e+06	8.5004e+06	2.16394e+07	1.01581e+07	6.16847e+06	1.96496e+07	1.74693	0.804822	0.0422411	0.861111	1.12226	up
Com_357_neg	Gluconic acid	--	C6 H12 O7	196.058	1.217	--	--	HMDB0000625	--	Organic oxygen compounds	Organooxygen compounds	Carbohydrates and carbohydrate conjugates	--	--	--	Full match	Full match	Full match	2.08463e+07	2.79562e+07	3.71104e+07	5.78951e+07	2.40585e+07	6.12752e+07	7.17162e+07	6.41415e+07	5.05587e+07	4.57994e+07	6.86467e+07	5.03835e+07	0.652368	-0.616242	0.0434014	0.833333	1.26492	down
Com_5412_neg	N1-(4-chlorophenyl)-3-(1H-pyrrol-1-ylmethyl)piperidine-1-carboxamide	--	C17 H20 Cl N3 O	317.13	11.475	--	--	--	--	--	--	--	--	--	--	Full match	No results	No results	969981	597071	193117	462732	810599	334899	979340	946749	873376	940444	1.02861e+06	824420	0.60226	-0.731542	0.0466228	0.888889	1.35534	down
Com_364_neg	trans-Petroselinic acid	--	C18 H34 O2	564.511	14.712	--	--	--	--	--	--	--	--	--	--	Invalid mass	No match	No results	2.42789e+07	3.45393e+07	1.21968e+07	4.56252e+07	2.97759e+07	3.95928e+07	4.63028e+07	4.23158e+07	4.55876e+07	5.36999e+07	4.84888e+07	4.8422e+07	0.653082	-0.614664	0.0472596	0.944444	1.41679	down
Com_6498_pos	N1-(1H-1,2,4-triazol-3-yl)-2-hydroxybenzamide	--	C9 H8 N4 O2	204.067	7.995	--	--	--	--	--	--	--	--	--	--	Invalid mass	No results	No results	100297	99437.5	106504	94115.5	96047.2	104248	2.88296e+06	2.78256e+06	3.10334e+06	3.03958e+06	2.69783e+06	2.94106e+06	0.0344265	-4.86034	7.97e-17	1	1.77516	down
Com_5290_pos	1H-indol-3-yl(pyridin-2-yl)methanol	--	C14 H12 N2 O	206.084	12.256	--	--	--	--	--	--	--	--	--	--	Invalid mass	No results	No results	199815	179264	160160	184018	197994	174682	4.46078e+06	4.55323e+06	4.96432e+06	4.97152e+06	4.00727e+06	4.26357e+06	0.0402611	-4.63447	1.48e-14	1	1.79517	down
Com_6938_pos	3-methoxy-2-phenyl-4H-furo[2,3-h]chromen-4-one	--	C18 H12 O4	292.073	11.741	--	--	--	--	--	--	--	--	--	--	Full match	No results	No results	122468	132889	133043	125864	125404	135308	3.13922e+06	2.81886e+06	3.08503e+06	3.10219e+06	2.71913e+06	2.65994e+06	0.0442228	-4.49907	4.44e-13	1	1.72375	down
Com_867_pos	3-(3-nitrophenyl)-1H-pyrazole	--	C9 H7 N3 O2	189.057	11.965	--	--	--	--	--	--	--	--	--	--	Invalid mass	No results	No results	264142	244955	290881	342339	396539	393951	7.05887e+07	6.4685e+07	8.97621e+07	8.76836e+07	6.42698e+07	7.72567e+07	0.00425498	-7.87663	1.34e-12	1	1.82357	down
Com_4068_pos	Phlorizin	Phlorizin; Phlorhizin; Phloridzin	C21 H24 O10	458.123	11.851	cpd:C01604	--	HMDB0036634	--	Phenylpropanoids and polyketides	Flavonoids	Flavonoid glycosides	--	--	--	Invalid mass	No results	No results	102479	186446	125439	109143	105750	121122	8.6186e+06	8.2713e+06	5.58302e+06	6.12191e+06	7.33233e+06	5.18507e+06	0.018252	-5.7758	2.09e-11	1	1.75309	down
Com_8281_pos	(2E)-3-(3,4-dimethoxyphenyl)prop-2-enoic acid	--	C11 H12 O4	190.065	11.966	--	--	HMDB0034315	--	Phenylpropanoids and polyketides	Cinnamic acids and derivatives	Hydroxycinnamic acids and derivatives	--	--	--	Invalid mass	No results	No results	112483	110570	116827	120124	119088	137930	1.51246e+06	1.42176e+06	1.44843e+06	2.01607e+06	1.27654e+06	1.62977e+06	0.0770574	-3.69792	1.48e-09	1	1.68594	down
Com_7499_pos	N3-(2-morpholinophenyl)-2-oxo-2H-chromene-3-carboxamide	--	C20 H18 N2 O4	368.136	11.964	--	--	--	--	--	--	--	--	--	--	Invalid mass	No results	No results	218826	215103	227276	219341	231674	220212	1.55303e+06	1.56701e+06	1.94323e+06	1.74701e+06	1.56676e+06	1.67758e+06	0.132519	-2.91572	2.95e-09	1	1.65322	down
Com_6264_pos	Estrone	Estrone; 3-Hydroxy-1,3,5(10)-estratrien-17-one	C18 H22 O2	252.151	12.651	cpd:C00468	map00140 Steroid hormone biosynthesis;map01100 Metabolic pathways;map04913 Ovarian steroidogenesis;map04917 Prolactin signaling pathway	HMDB0000145	LMST02010004	Lipids and lipid-like molecules	Steroids and steroid derivatives	Estrane steroids	Sterol Lipids [ST]	Steroids [ST02]	C18 steroids (estrogens) and derivatives [ST0201]	Invalid mass	No results	No results	619332	606053	662910	460267	643944	581087	3.39647e+06	4.57076e+06	4.66019e+06	3.27851e+06	3.72491e+06	3.14121e+06	0.156929	-2.67182	3.32e-09	1	1.59287	down
Com_3240_pos	Valsartan metabolite	--	C14 H10 N4 O2	266.08	10.64	--	--	--	--	--	--	--	--	--	--	Full match	No results	No results	85479.7	87516.3	89885.1	76919.7	83948.4	84258	1.32682e+07	1.28405e+07	8.75586e+06	9.38469e+06	1.28223e+07	8.74511e+06	0.00771853	-7.01746	5.35e-09	1	1.78725	down
Com_12333_pos	6-(3-hydroxybutan-2-yl)-5-(hydroxymethyl)-4-methoxy-2H-pyran-2-one	--	C11 H16 O5	250.085	10.511	--	--	--	--	--	--	--	--	--	--	Invalid mass	No results	No results	177087	171349	184872	124538	189304	154529	627162	591503	509255	550174	724512	580231	0.279577	-1.83868	4.18e-08	1	1.48535	down
Com_8604_pos	N1-methyl-5-methoxy-2-({2-[(methylamino)carbonyl]phenyl}thio)benzamide	--	C17 H18 N2 O3 S	352.092	10.704	--	--	--	--	--	--	--	--	--	--	Invalid mass	No results	No results	93176.1	153054	218959	165512	104635	189034	1.83872e+06	1.70555e+06	1.11611e+06	1.25132e+06	1.91365e+06	1.11377e+06	0.103407	-3.27359	2.23e-07	1	2.19694	down
Com_4448_pos	Galangin	Galangin; 3,5,7-Trihydroxyflavone	C15 H10 O5	270.053	10.936	cpd:C10044	--	HMDB0029521	LMPK12111653	Phenylpropanoids and polyketides	Flavonoids	Flavones	Polyketides [PK]	Flavonoids [PK12]	Flavones and Flavonols [PK1211]	Full match	No results	No results	1.19729e+07	1.10239e+07	1.08022e+07	1.06049e+07	1.07951e+07	1.15001e+07	2.46393e+06	2.33854e+06	3.12531e+06	3.30909e+06	2.38999e+06	2.84643e+06	4.04892	2.01754	5.72e-07	1	1.5727	up
Com_295_pos	Trigonelline	N-Methylnicotinate; Trigonelline; Trigenelline; 1-Methylpyridinio-3-carboxylate; Betaine nicotinate; Caffearin; Gynesine	C7 H7 N O2	115.063	1.326	cpd:C01004	map00760 Nicotinate and nicotinamide metabolism	HMDB0000875	--	Alkaloids and derivatives	_	_	--	--	--	Invalid mass	No results	No match	6.27396e+08	679155902	740527956	6.23423e+08	6.48371e+08	6.87898e+08	3.995e+08	3.89641e+08	3.93673e+08	4.03677e+08	3.86013e+08	382292861	1.70154	0.766838	1.42e-06	1	1.96719	up
Com_8408_pos	Wogonin	Wogonin; Norwogonin 8-methyl ether	C16 H12 O5	284.068	10.516	cpd:C10197	--	--	LMPK12111330	--	--	--	Polyketides [PK]	Flavonoids [PK12]	Flavones and Flavonols [PK1211]	Full match	No results	No results	1.99988e+06	1.98921e+06	2.2158e+06	3.07591e+06	1.85113e+06	2.62748e+06	658984	626891	652252	561894	642582	570028	3.70611	1.8899	3.3e-06	1	1.69219	up
Com_1659_pos	4-(acetylamino)phenyl 3-chlorobenzoate	--	C15 H12 Cl N O3	327.004	8.35	--	--	--	--	--	--	--	--	--	--	Invalid mass	No results	No results	1.74619e+07	1.44502e+07	1.33822e+07	1.12659e+07	1.38241e+07	1.11194e+07	4.30436e+07	4.23049e+07	3.7596e+07	3.77752e+07	4.04044e+07	3.71983e+07	0.341989	-1.54798	3.44e-06	1	2.19091	down
Com_6830_pos	D-Glucosamine	D-Glucosamine; Chitosamine; 2-Amino-2-deoxy-D-glucose	C6 H13 N O5	179.079	8.349	cpd:C00329	map00520 Amino sugar and nucleotide sugar metabolism;map01100 Metabolic pathways	HMDB0001514	--	Organic oxygen compounds	Organooxygen compounds	Carbohydrates and carbohydrate conjugates	--	--	--	No results	No results	Full match	1.42648e+06	1.28957e+06	1.43099e+06	1.03609e+06	1.49156e+06	1.0308e+06	3.51439e+06	3.59859e+06	2.9704e+06	3.25887e+06	3.40148e+06	3.20207e+06	0.386321	-1.37213	5.26e-06	1	2.12319	down
Com_2707_pos	Daidzein	Daidzein	C15 H10 O4	254.058	10.41	cpd:C10208	--	HMDB0003312	LMPK12050038	Phenylpropanoids and polyketides	Isoflavonoids	Isoflav-2-enes	Polyketides [PK]	Flavonoids [PK12]	Isoflavonoids [PK1205]	Full match	Full match	No results	2.18237e+07	2.14746e+07	2.22674e+07	2.4444e+07	2.0278e+07	2.38087e+07	5.76375e+06	5.64617e+06	8.48796e+06	8.94643e+06	6.27361e+06	8.01619e+06	3.10883	1.63637	1.12e-05	1	1.36769	up
Com_388_pos	2-Amino-1,3,4-octadecanetriol	--	C18 H39 N O3	317.292	12.657	--	--	--	--	--	--	--	--	--	--	Full match	No results	No results	1.6248e+08	1.80783e+08	1.67389e+08	1.05292e+08	1.73526e+08	156230277	4.11148e+08	2.97796e+08	3.21773e+08	4.06792e+08	3.47794e+08	4.7939e+08	0.417584	-1.25986	1.15e-05	1	2.39972	down
Com_1043_pos	PC (14:1e/5:0)	--	C27 H54 N O7 P	535.363	15.144	--	--	--	--	--	--	--	--	--	--	No results	Full match	No results	5.88203e+07	5.907e+07	6.60271e+07	5.40294e+07	5.74642e+07	5.21577e+07	3.58294e+07	3.93584e+07	4.07263e+07	3.96791e+07	3.35488e+07	3.05322e+07	1.5822	0.661932	1.88e-05	1	1.57934	up
Com_10956_pos	4-(5-propyl-2-pyridyl)benzonitrile	--	C15 H14 N2	244.1	11.279	--	--	--	--	--	--	--	--	--	--	Invalid mass	No results	No results	439915	272206	224074	398051	332474	287566	1.0286e+06	995782	665618	665609	1.02743e+06	931193	0.367746	-1.44322	2.32e-05	1	1.98354	down
Com_4014_pos	Phenylpropiolic acid	--	C9 H6 O2	146.037	8.88	--	--	HMDB0002359	--	Benzenoids	Benzene and substituted derivatives	_	--	--	--	No results	No results	Full match	1.40495e+07	1.03268e+07	1.09725e+07	6.52495e+06	1.12232e+07	1.04571e+07	2.52176e+06	2.61774e+06	2.82883e+06	2.77878e+06	2.59016e+06	2.70877e+06	3.96074	1.98577	3.19e-05	1	1.96116	up
Com_3570_pos	Phenylpyruvic Acid	Phenylpyruvate; Phenylpyruvic acid; alpha-Ketohydrocinnamic acid; keto-Phenylpyruvate; 3-Phenyl-2-oxopropanoate; 2-Oxo-3-phenylpropanoate	C9 H8 O3	164.047	8.879	cpd:C00166	map00360 Phenylalanine metabolism;map00400 Phenylalanine, tyrosine and tryptophan biosynthesis;map01100 Metabolic pathways;map01210 2-Oxocarboxylic acid metabolism;map01230 Biosynthesis of amino acids	HMDB0000205	--	Benzenoids	Benzene and substituted derivatives	Phenylpyruvic acid derivatives	--	--	--	No results	No results	Full match	1.72927e+07	1.29663e+07	1.33614e+07	8.27993e+06	1.44488e+07	1.3335e+07	3.48251e+06	3.54952e+06	3.70463e+06	3.81889e+06	3.43864e+06	3.66699e+06	3.67865	1.87918	3.77e-05	1	1.98063	up
Com_3878_pos	PC (9:0/9:0)	--	C26 H52 N O8 P	537.342	13.571	--	--	--	LMGP01011270	--	--	--	Glycerophospholipids [GP]	Glycerophosphocholines [GP01]	Diacylglycerophosphocholines [GP0101]	No results	Full match	No results	1.183e+07	1.20085e+07	1.57001e+07	8.90678e+06	1.27301e+07	1.20287e+07	6.98163e+06	7.63089e+06	5.74377e+06	5.03999e+06	5.7163e+06	4.98382e+06	2.02802	1.02007	4.23e-05	1	1.43898	up
Com_6993_pos	4-cyclopropyl-6-(methylthio)-2-pyrazin-2-ylpyrimidine-5-carbonitrile	--	C13 H11 N5 S	269.072	8.43	--	--	--	--	--	--	--	--	--	--	Invalid mass	No results	No results	4.16603e+06	4.91216e+06	4.65357e+06	1.39966e+06	4.24115e+06	3.25406e+06	517240	405200	766073	675276	487268	659506	6.4453	2.68825	4.73e-05	1	1.99495	up
Com_6571_pos	2,3,4,9-Tetrahydro-1H-β-carboline-3-carboxylic acid	--	C12 H12 N2 O2	216.09	7.884	--	--	--	--	--	--	--	--	--	--	Full match	No results	No results	4.74183e+06	4.99232e+06	5.06505e+06	3.98318e+06	4.98897e+06	5.93055e+06	3.23369e+06	3.13333e+06	2.83921e+06	2.86267e+06	3.14904e+06	2.7948e+06	1.64894	0.721538	4.88e-05	1	1.68884	up
Com_280_pos	Palmitic Acid	Hexadecanoic acid; Hexadecanoate; Hexadecylic acid; Palmitic acid; Palmitate; Cetylic acid	C16 H32 O2	273.266	12.652	cpd:C00249	map00061 Fatty acid biosynthesis;map00062 Fatty acid elongation;map00071 Fatty acid degradation;map01040 Biosynthesis of unsaturated fatty acids;map01100 Metabolic pathways;map01212 Fatty acid metabolism	HMDB0000220	LMFA01010001	Lipids and lipid-like molecules	Fatty Acyls	Fatty acids and conjugates	Fatty Acyls [FA]	Fatty Acids and Conjugates [FA01]	Straight chain fatty acids [FA0101]	Invalid mass	No results	No results	6.44441e+08	5.07654e+08	5.02857e+08	6.30291e+08	5.81172e+08	6.83694e+08	3.72919e+08	4.01595e+08	3.99816e+08	2.87696e+08	3.71404e+08	3.45809e+08	0.613851	-0.704039	5.45e-05	1	2.22307	down
Com_3892_pos	L-Acetylcarnitine	--	C9 H17 N O4	203.115	9.551	--	--	HMDB0000201	LMFA07070050	Lipids and lipid-like molecules	Fatty Acyls	Fatty acid esters	Fatty Acyls [FA]	Fatty esters [FA07]	Fatty acyl carnitines [FA0707]	No results	No results	Full match	1.1313e+07	1.02318e+07	8.72885e+06	1.11762e+07	1.14926e+07	1.08705e+07	4.57708e+06	6.61602e+06	6.09871e+06	6.50838e+06	6.99071e+06	6.51544e+06	1.71051	0.774428	5.6e-05	1	1.38437	up
Com_6734_pos	3-(propan-2-yl)-octahydropyrrolo[1,2-a]pyrazine-1,4-dione	--	C10 H16 N2 O2	196.121	7.758	--	--	--	--	--	--	--	--	--	--	Full match	No results	No results	4.71617e+06	5.32992e+06	3.56646e+06	3.59907e+06	4.46761e+06	3.69309e+06	1.94085e+06	2.06905e+06	2.05258e+06	1.8251e+06	1.77393e+06	1.07322e+06	2.36357	1.24097	6.06e-05	1	1.95699	up
Com_9702_pos	Pyridoxine O-Glucoside	--	C14 H21 N O8	331.127	6.549	--	--	--	--	--	--	--	--	--	--	No results	No results	Full match	1.33477e+06	2.05874e+06	2.42073e+06	1.88905e+06	1.19956e+06	2.4072e+06	512221	725373	796036	828582	537282	613267	2.81852	1.49494	7.81e-05	1	1.83589	up
Com_4130_pos	Hydroxyhomosildenafil	--	C23 H32 N6 O5 S	504.218	5.841	--	--	HMDB0060932	--	Benzenoids	Benzene and substituted derivatives	Benzenesulfonamides	--	--	--	Full match	No results	No results	1.24895e+07	1.08131e+07	9.09825e+06	9.7738e+06	1.26826e+07	1.14542e+07	5.29283e+06	7.48055e+06	5.22562e+06	4.42312e+06	6.85103e+06	5.43924e+06	1.91031	0.933809	8.14e-05	1	1.83873	up
Com_8915_pos	ethyl 4-({3-[5-(trifluoromethyl)-2-pyridyl]prop-2-ynyl}oxy)benzoate	--	C18 H14 F3 N O3	349.096	11.726	--	--	--	--	--	--	--	--	--	--	Invalid mass	No results	No results	2.86392e+06	2.86753e+06	2.18328e+06	1.8311e+06	2.41054e+06	1.80675e+06	1.02955e+06	1.05624e+06	978648	968133	966321	896613	2.36844	1.24393	8.73e-05	1	2.25235	up
Com_5921_pos	Cantharidin	Cantharidin	C10 H12 O4	196.071	9.453	cpd:C16778	--	--	--	--	--	--	--	--	--	Invalid mass	No results	No results	4.89874e+06	5.49607e+06	6.30547e+06	4.42267e+06	6.48558e+06	6.38985e+06	3.48785e+06	3.73704e+06	2.82087e+06	3.15773e+06	3.96459e+06	2.90622e+06	1.69363	0.760116	0.000126142	1	1.15098	up
Com_7951_pos	7,8-Dihydrofolate	Dihydrofolate; Dihydrofolic acid; 7,8-Dihydrofolate; 7,8-Dihydrofolic acid; 7,8-Dihydropteroylglutamate	C19 H21 N7 O6	443.156	9.045	cpd:C00415	map00670 One carbon pool by folate;map00790 Folate biosynthesis;map01100 Metabolic pathways;map01523 Antifolate resistance	HMDB0001056	--	Organic acids and derivatives	Carboxylic acids and derivatives	Amino acids, peptides, and analogues	--	--	--	No results	No results	Full match	515876	609767	1.03397e+06	885438	566853	707698	1.60575e+06	1.78027e+06	2.02011e+06	2.01161e+06	1.6453e+06	1.93223e+06	0.392859	-1.34791	0.000132382	1	1.57784	down
Com_9855_pos	2-(3,4-dimethoxyphenyl)ethanamine	--	C10 H15 N O2	181.11	11.93	--	--	HMDB0041806	--	Benzenoids	Benzene and substituted derivatives	Methoxybenzenes	--	--	--	No results	No results	Full match	2.22031e+06	2.17154e+06	1.79681e+06	1.23692e+06	2.05555e+06	1.40493e+06	798071	924391	888599	925015	848807	598657	2.1844	1.12724	0.000141111	1	1.58406	up
Com_8465_pos	4-Methoxycinnamic Acid	--	C10 H10 O3	178.063	8.882	--	--	HMDB0002040	--	Phenylpropanoids and polyketides	Cinnamic acids and derivatives	Cinnamic acids	--	--	--	No results	No results	Full match	2.85198e+06	2.36648e+06	2.58179e+06	1.86277e+06	3.09914e+06	1.88208e+06	1.0804e+06	978790	1.00715e+06	1.05345e+06	1.02121e+06	1.06223e+06	2.36075	1.23924	0.000150228	1	1.94098	up
Com_1996_pos	Palmitoleic Acid	(9Z)-Hexadecenoic acid; Palmitoleic acid; cis-9-Hexadecenoic acid; (9Z)-Hexadec-9-enoate	C16 H30 O2	276.208	13.652	cpd:C08362	map00061 Fatty acid biosynthesis	HMDB0012328	LMFA01030056	Lipids and lipid-like molecules	Fatty Acyls	Fatty acids and conjugates	Fatty Acyls [FA]	Fatty Acids and Conjugates [FA01]	Unsaturated fatty acids [FA0103]	Invalid mass	No results	No results	2.52551e+07	3.74825e+07	4.78177e+07	2.97732e+07	3.35812e+07	4.21506e+07	1.55382e+07	1.53479e+07	1.67113e+07	2.04542e+07	1.4863e+07	1.69046e+07	2.16452	1.11405	0.000153042	1	1.78661	up
Com_1176_pos	PC (4:0/16:3)	--	C28 H50 N O8 P	559.327	13.534	--	--	--	--	--	--	--	--	--	--	No results	Full match	No results	5.58299e+07	9.60684e+07	1.00992e+08	8.39122e+07	6.89183e+07	9.06094e+07	4.8739e+07	4.6714e+07	3.63076e+07	3.82127e+07	4.14554e+07	3.24726e+07	2.03496	1.025	0.00016089	1	1.67897	up
Com_5807_pos	N-(4-fluorophenyl)-N'-(2-piperidinophenyl)urea	--	C18 H20 F N3 O	351.111	12.12	--	--	--	--	--	--	--	--	--	--	Invalid mass	No results	No results	4.6795e+06	5.80788e+06	6.28892e+06	6.57951e+06	4.35739e+06	4.84653e+06	3.69963e+06	3.66329e+06	2.88131e+06	3.16138e+06	3.00708e+06	2.63812e+06	1.7091	0.773237	0.000165233	1	1.45609	up
Com_7498_pos	LSD-d3	--	C20 H22 [2]H3 N3 O	326.224	13.572	--	--	--	--	--	--	--	--	--	--	Invalid mass	No results	No results	3.77693e+06	4.23314e+06	4.20807e+06	2.31515e+06	3.52824e+06	3.47139e+06	1.87648e+06	1.77824e+06	1.12707e+06	2.1863e+06	1.58767e+06	1.79068e+06	2.08119	1.05741	0.000199652	1	1.89683	up
Com_804_pos	PC (4:0/18:5)	--	C30 H50 N O8 P	583.327	13.502	--	--	--	--	--	--	--	--	--	--	No results	Full match	No results	8.6215e+07	1.58232e+08	1.46642e+08	1.34157e+08	1.10642e+08	1.44619e+08	7.70967e+07	7.07858e+07	5.3078e+07	6.14839e+07	7.82738e+07	4.51518e+07	2.02272	1.0163	0.000281703	1	1.35223	up
Com_7470_pos	methyl isoquinoline-3-carboxylate	--	C11 H9 N O2	187.06	5.673	--	--	--	--	--	--	--	--	--	--	Invalid mass	No results	No results	4.33803e+06	3.58413e+06	4.51848e+06	2.59187e+06	3.69533e+06	3.11215e+06	1.90847e+06	2.10793e+06	2.14223e+06	2.17939e+06	1.96039e+06	1.58868e+06	1.83729	0.877577	0.000298624	1	1.91475	up
Com_5515_pos	LPC 15:1	--	C23 H46 N O7 P	479.301	14.164	--	--	--	LMGP01050125	--	--	--	Glycerophospholipids [GP]	Glycerophosphocholines [GP01]	Monoacylglycerophosphocholines [GP0105]	No results	Full match	No results	4.49405e+06	5.80344e+06	8.12207e+06	4.63996e+06	5.67824e+06	5.73768e+06	3.48946e+06	2.8038e+06	2.81044e+06	3.24431e+06	3.74678e+06	2.92399e+06	1.8127	0.858144	0.00039301	1	1.93548	up
Com_1940_pos	8-Hydroxyquinoline	8-Hydroxyquinoline; Oxyquinoline	C9 H7 N O	145.053	8.602	cpd:C19434	--	--	--	--	--	--	--	--	--	Full match	Full match	No results	1.31856e+07	1.57816e+07	1.83688e+07	1.52801e+07	1.46362e+07	1.77626e+07	4.6448e+07	4.38934e+07	2.30672e+07	2.91511e+07	4.51651e+07	2.78747e+07	0.440701	-1.18213	0.000713283	1	1.95572	down
Com_471_pos	L-Tyrosine	L-Tyrosine; (S)-3-(p-Hydroxyphenyl)alanine; (S)-2-Amino-3-(p-hydroxyphenyl)propionic acid; Tyrosine	C9 H11 N O3	181.074	1.371	cpd:C00082	map00130 Ubiquinone and other terpenoid-quinone biosynthesis;map00350 Tyrosine metabolism;map00360 Phenylalanine metabolism;map00400 Phenylalanine, tyrosine and tryptophan biosynthesis;map00730 Thiamine metabolism;map00970 Aminoacyl-tRNA biosynthesis;map01100 Metabolic pathways	HMDB0000158	--	Organic acids and derivatives	Carboxylic acids and derivatives	Amino acids, peptides, and analogues	--	--	--	Full match	Full match	Full match	3.92014e+08	2.09974e+08	3.06234e+08	2.46479e+08	3.22148e+08	2.86608e+08	1.77797e+08	1.6739e+08	1.69761e+08	1.98365e+08	1.43551e+08	1.57491e+08	1.7385	0.797845	0.000817616	1	1.52847	up
Com_3911_pos	LPC 18:4	--	C26 H46 N O7 P	515.298	14.006	--	--	--	LMGP01050129	--	--	--	Glycerophospholipids [GP]	Glycerophosphocholines [GP01]	Monoacylglycerophosphocholines [GP0105]	No results	Invalid mass	No results	9.86482e+06	1.188e+07	1.55255e+07	9.51488e+06	1.15261e+07	1.48077e+07	7.55651e+06	7.90981e+06	6.20109e+06	7.76814e+06	7.57509e+06	6.97031e+06	1.66252	0.733367	0.000966999	1	1.77847	up
Com_2067_pos	α-Linolenic acid	--	C18 H30 O2	278.224	13.35	--	--	--	--	--	--	--	--	--	--	Full match	No results	Full match	2.76963e+07	3.14181e+07	4.38105e+07	2.29185e+07	2.94139e+07	3.88899e+07	1.7691e+07	1.69227e+07	2.19939e+07	1.68889e+07	1.74856e+07	1.66207e+07	1.80429	0.851434	0.00099477	1	1.3048	down
Com_8712_pos	11β-Prostaglandin F2α	--	C20 H34 O5	376.224	12.276	--	--	--	--	--	--	--	--	--	--	Invalid mass	No results	No results	3.06939e+06	2.13257e+06	2.72315e+06	1.36775e+06	2.15688e+06	2.88703e+06	1.11733e+06	1.12742e+06	1.11907e+06	968224	1.07396e+06	1.00504e+06	2.23626	1.16109	0.00114355	1	1.66687	up
Com_5112_pos	D-(+)-Tryptophan	--	C11 H12 N2 O2	204.09	9.227	--	--	HMDB0013609	--	Organoheterocyclic compounds	Indoles and derivatives	Indolyl carboxylic acids and derivatives	--	--	--	Full match	Full match	Full match	8.45588e+06	7.6402e+06	6.66143e+06	4.53661e+06	8.6045e+06	6.04933e+06	4.05686e+06	3.70822e+06	3.43908e+06	3.8542e+06	3.42502e+06	3.71489e+06	1.88969	0.918153	0.00114809	1	1.94013	up
Com_1344_pos	ACar 14:1	--	C21 H40 N O4	369.287	13.19	--	--	--	--	--	--	--	--	--	--	No results	Invalid mass	No results	2.43833e+07	2.54606e+07	3.0394e+07	3.72312e+07	2.22482e+07	3.4469e+07	5.15605e+07	4.64303e+07	4.48891e+07	4.59161e+07	4.94804e+07	4.91855e+07	0.605946	-0.722739	0.00119996	1	1.95971	down
Com_843_pos	2-(acetylamino)-3-(1H-indol-3-yl)propanoic acid	--	C13 H14 N2 O3	246.1	9.232	--	--	--	--	--	--	--	--	--	--	Full match	Full match	No results	1.44415e+08	146148381	1.39358e+08	7.48183e+07	1.46871e+08	1.17572e+08	6.46037e+07	6.50544e+07	6.09328e+07	6.3653e+07	6.39962e+07	5.83394e+07	2.04255	1.03037	0.00123733	1	1.97806	up
Com_1540_pos	9-Oxo-ODE	--	C18 H30 O3	294.219	13.92	--	--	HMDB0004669	--	Lipids and lipid-like molecules	Fatty Acyls	Lineolic acids and derivatives	--	--	--	Full match	No results	Full match	2.91985e+07	3.72558e+07	6.93578e+07	3.29862e+07	3.19671e+07	5.43968e+07	1.76418e+07	1.78735e+07	1.4899e+07	1.99403e+07	2.03745e+07	1.61599e+07	2.38717	1.2553	0.00128853	1	1.66024	up
Com_9385_pos	RPK	--	C17 H33 N7 O4	399.262	11.349	--	--	--	--	--	--	--	--	--	--	Invalid mass	No results	No results	1.07671e+06	1.63182e+06	2.66385e+06	1.1007e+06	1.48481e+06	1.99369e+06	866700	722778	653036	706024	720585	547397	2.36014	1.23887	0.00129348	1	1.56436	up
Com_9099_pos	10-Nitrolinoleate	--	C18 H31 N O4	331.236	11.378	--	--	HMDB0005049	--	Lipids and lipid-like molecules	Fatty Acyls	Lineolic acids and derivatives	--	--	--	Invalid mass	No results	No results	749421	1.10595e+06	1.05711e+06	1.33084e+06	837638	1.12326e+06	1.99692e+06	1.95008e+06	1.38181e+06	1.43519e+06	1.82474e+06	1.43785e+06	0.618776	-0.692511	0.00148099	1	1.6951	down
Com_5298_pos	Palmitoyl ethanolamide	--	C18 H37 N O2	299.282	12.541	--	--	HMDB0002100	LMFA08040013	Organic acids and derivatives	Carboximidic acids and derivatives	Carboximidic acids	Fatty Acyls [FA]	Fatty amides [FA08]	N-acyl ethanolamines (endocannabinoids) [FA0804]	Full match	No results	No results	953571	1.31104e+06	2.59599e+06	770438	991178	1.75298e+06	4.18249e+06	2.51454e+06	2.75986e+06	5.18552e+06	2.83085e+06	7.87746e+06	0.330373	-1.59783	0.00159117	0.972222	1.87584	down
Com_1056_pos	Sphingosine (d18:1)	--	C18 H37 N O2	299.282	13.632	--	--	--	--	--	--	--	--	--	--	Full match	No results	No results	8.8698e+07	8.06193e+07	1.18648e+08	5.8727e+07	8.95196e+07	9.99642e+07	5.51867e+07	6.00341e+07	4.93857e+07	5.06181e+07	5.55171e+07	4.31142e+07	1.70835	0.772603	0.00166553	0.972222	2.00344	up
Com_2121_pos	6-Pentyl-2H-pyran-2-one	--	C10 H14 O2	166.099	9.211	--	--	HMDB0031085	--	Organoheterocyclic compounds	Pyrans	Pyranones and derivatives	--	--	--	Full match	No results	No results	2.30136e+07	3.28001e+07	4.39742e+07	2.78978e+07	2.6523e+07	3.88666e+07	2.00624e+07	1.87287e+07	1.78715e+07	1.84379e+07	1.8046e+07	1.56275e+07	1.77501	0.827829	0.00185076	1	1.67378	up
Com_10708_pos	NNK	4-(N-Nitrosomethylamino)-1-(3-pyridyl)-1-butanone; NNK	C14 H26 N6 O6	396.176	10.793	cpd:C16453	map00980 Metabolism of xenobiotics by cytochrome P450;map05204 Chemical carcinogenesis	HMDB0011603	--	Organic oxygen compounds	Organooxygen compounds	Carbonyl compounds	--	--	--	Invalid mass	No results	No results	298166	1.0569e+06	1.79374e+06	614049	723040	1.24033e+06	205927	178384	191969	255020	179277	258388	4.51251	2.17393	0.00241269	1	1.49112	up
Com_1241_pos	Indole-3-acetic acid	Indole-3-acetate; Indole-3-acetic acid; (Indol-3-yl)acetate; Indoleacetate; Indoleacetic acid; IAA	C10 H9 N O2	175.063	9.688	cpd:C00954	map00380 Tryptophan metabolism;map01100 Metabolic pathways	HMDB0000197	--	Organoheterocyclic compounds	Indoles and derivatives	Indolyl carboxylic acids and derivatives	--	--	--	Full match	Full match	Full match	9.01818e+07	6.79313e+07	4.18731e+07	2.6078e+07	8.01273e+07	3.59896e+07	1.67428e+07	1.64053e+07	1.95474e+07	2.09749e+07	1.64642e+07	1.95817e+07	3.11878	1.64098	0.00299139	1	1.62726	up
Com_403_pos	Nicotinamide	Nicotinamide; Nicotinic acid amide; Niacinamide; Vitamin PP	C6 H6 N2 O	122.048	1.931	cpd:C00153	map00760 Nicotinate and nicotinamide metabolism;map01100 Metabolic pathways;map04977 Vitamin digestion and absorption	HMDB0001406	--	Organoheterocyclic compounds	Pyridines and derivatives	Pyridinecarboxylic acids and derivatives	--	--	--	Full match	Full match	Full match	3.54379e+08	3.61112e+08	4.02693e+08	372757511	3.19339e+08	3.27964e+08	2.95575e+08	2.19596e+08	1.45207e+08	1.89017e+08	2.59944e+08	1.80544e+08	0.603245	-0.729185	0.00300111	1	1.667	down
Com_8059_pos	delta8-THC-d9	--	C21 H21 [2]H9 O2	323.282	14.68	--	--	--	--	--	--	--	--	--	--	Full match	No results	No results	2.86593e+06	2.58781e+06	3.00376e+06	1.98653e+06	3.48421e+06	2.72479e+06	1.99309e+06	1.33408e+06	1.68986e+06	1.80133e+06	2.28001e+06	1.94494e+06	1.50797	0.592611	0.00322096	0.944444	1.39517	up
Com_10652_pos	ethyl 4-hydroxy-2-[(4-methoxyphenoxy)methyl]pyrimidine-5-carboxylate	--	C15 H16 N2 O5	304.103	9.572	--	--	--	--	--	--	--	--	--	--	Invalid mass	No results	No results	439311	1.2611e+06	1.82054e+06	487214	848263	1.36023e+06	308601	319404	273558	252597	242134	263060	3.74644	1.90552	0.00345934	1	1.89693	up
Com_5415_pos	Xanthosine	Xanthosine	C10 H12 N4 O6	284.075	4.994	cpd:C01762	map00230 Purine metabolism;map00232 Caffeine metabolism;map01100 Metabolic pathways	HMDB0000299	--	Nucleosides, nucleotides, and analogues	Purine nucleosides	_	--	--	--	No results	No results	Full match	1.79892e+06	3.53571e+06	5.02395e+06	3.1569e+06	2.87025e+06	4.55758e+06	1.80647e+06	1.78772e+06	1.4768e+06	1.54487e+06	1.77275e+06	1.33192e+06	2.15455	1.10738	0.00365331	0.972222	1.267	up
Com_1247_pos	Quinoline	Quinoline; Benzo[b]pyridine	C9 H7 N	129.058	9.687	cpd:C06413	--	HMDB0033731	--	Organoheterocyclic compounds	Quinolines and derivatives	_	--	--	--	Full match	No results	No results	8.94616e+07	6.78144e+07	4.35998e+07	2.61618e+07	8.41932e+07	3.82932e+07	1.80969e+07	1.98062e+07	21038661	2.21603e+07	1.95557e+07	2.2055e+07	2.84831	1.51011	0.00453459	1	1.56092	up
Com_1169_pos	Acetylcholine	Acetylcholine; O-Acetylcholine	C7 H15 N O2	145.11	1.328	cpd:C01996	map00564 Glycerophospholipid metabolism;map04024 cAMP signaling pathway;map04080 Neuroactive ligand-receptor interaction;map04721 Synaptic vesicle cycle;map04725 Cholinergic synapse;map04742 Taste transduction;map04810 Regulation of actin cytoskeleton;map04911 Insulin secretion;map04970 Salivary secretion;map04971 Gastric acid secretion;map04972 Pancreatic secretion;map04976 Bile secretion;map050…	--	--	--	--	--	--	--	--	No results	No results	Full match	9.08545e+07	9.15619e+07	6.56679e+07	51585300	9.2721e+07	6.42655e+07	4.90505e+07	4.75888e+07	4.72341e+07	4.3284e+07	4.54215e+07	4.45867e+07	1.64759	0.720361	0.00466675	1	1.89053	up
Com_1178_pos	13,14-dihydro-15-keto-PGD2	--	C20 H32 O5	352.224	12.077	--	--	HMDB0060042	LMFA03010022	Lipids and lipid-like molecules	Fatty Acyls	Eicosanoids	Fatty Acyls [FA]	Eicosanoids [FA03]	Prostaglandins [FA0301]	No results	No results	Full match	5.31426e+07	8.06375e+07	1.0215e+08	3.70063e+07	4.82784e+07	5.81393e+07	3.35784e+07	31198202	2.4167e+07	3.34397e+07	4.23219e+07	2.33055e+07	2.01773	1.01273	0.00483764	0.972222	1.86707	up
Com_2885_pos	N-Acetylvaline	--	C7 H13 N O3	159.089	7.258	--	--	HMDB0011757	--	Organic acids and derivatives	Carboxylic acids and derivatives	Amino acids, peptides, and analogues	--	--	--	No results	No results	Full match	4.11808e+06	5.51779e+06	7.26888e+06	1.07627e+07	5.61999e+06	1.18744e+07	1.77122e+07	1.76324e+07	1.17468e+07	1.23673e+07	1.82327e+07	1.18524e+07	0.504355	-0.987488	0.00531758	0.944444	1.82104	down
Com_6260_pos	ACar 22:6	--	C29 H46 N O4	471.334	13.7	--	--	--	--	--	--	--	--	--	--	No results	Invalid mass	No results	1.41647e+06	2.35664e+06	2.36057e+06	2.56066e+06	1.64606e+06	2.70083e+06	3.11813e+06	4.20555e+06	3.00339e+06	3.15958e+06	3.00727e+06	3.89954e+06	0.639481	-0.645027	0.00549249	1	1.62198	down
Com_3101_pos	Punicic Acid	Punicic acid; cis-9,trans-11,cis-13-Octadecatrienoic acid; Trichosanic acid	C18 H30 O2	278.224	14.188	cpd:C08364	--	HMDB0030963	LMFA01030146	Lipids and lipid-like molecules	Lineolic acids and derivatives	_	Fatty Acyls [FA]	Fatty Acids and Conjugates [FA01]	Unsaturated fatty acids [FA0103]	No results	No results	Full match	8.25244e+06	1.38596e+07	2.33592e+07	1.3273e+07	1.16005e+07	1.62727e+07	8.84593e+06	7.70884e+06	6.29351e+06	8.13175e+06	8.19507e+06	6.02068e+06	1.9165	0.938471	0.00573907	0.972222	1.35759	up
Com_1649_pos	Cafestol	Cafestol	C20 H28 O3	316.203	12.073	cpd:C09066	--	HMDB0035710	--	Organoheterocyclic compounds	Naphthofurans	_	--	--	--	Full match	No results	Full match	2.48769e+07	3.80954e+07	6.32714e+07	2.14577e+07	4.58835e+07	3.54037e+07	1.9567e+07	2.35605e+07	1.37574e+07	1.62395e+07	2.19433e+07	1.45431e+07	2.08911	1.06289	0.00594467	0.944444	1.77888	up
Com_6789_pos	5-amino-1-(4-chlorobenzyl)-1H-1,2,3-triazole-4-carboxamide	--	C10 H10 Cl N5 O	251.053	10.452	--	--	--	--	--	--	--	--	--	--	Invalid mass	No results	No results	4.86299e+06	4.52794e+06	3.98865e+06	1.59142e+06	5.00136e+06	3.47342e+06	1.98973e+06	1.82556e+06	1.4712e+06	1.60155e+06	1.91097e+06	1.58649e+06	2.25755	1.17476	0.00657729	0.888889	1.54485	up
Com_5225_pos	13-Hotre(R)	--	C18 H30 O3	294.219	13.417	--	--	--	--	--	--	--	--	--	--	No results	No results	Full match	8.78011e+06	6.03055e+06	5.59251e+06	2.75036e+06	6.80458e+06	3.81188e+06	2.45087e+06	2.25697e+06	2.67316e+06	2.89265e+06	2.63805e+06	2.2227e+06	2.23134	1.15791	0.00660744	0.972222	1.3461	up
Com_172_pos	Gramine	Gramine; (1H-Indol-3-ylmethyl)dimethylamine; (1H-Indol-3-yl)-N,N-dimethylmethanamine	C11 H14 N2	129.058	10.451	cpd:C08304	--	--	--	--	--	--	--	--	--	Invalid mass	No results	No results	1136202340	1062926603	9.76947e+08	4.53172e+08	1160554002	7.69966e+08	5.28882e+08	5.23584e+08	423569716	4.4243e+08	5.09691e+08	4.19274e+08	1.95256	0.965363	0.00664613	0.916667	1.40119	up
Com_5662_pos	Tetranor-12(S)-HETE	--	C16 H26 O3	288.17	13.414	--	--	--	--	--	--	--	--	--	--	Invalid mass	No results	No results	2.50949e+06	2.96774e+06	5.38294e+06	3.00534e+06	2.15648e+06	4.7356e+06	1.96019e+06	2.16885e+06	1.36801e+06	1.52261e+06	2.18984e+06	1.60773e+06	1.91894	0.940308	0.00673755	0.944444	1.33487	down
Com_7327_pos	Asp-Phe	--	C13 H16 N2 O5	280.106	7.505	--	--	--	--	--	--	--	--	--	--	No results	No results	Full match	2.17861e+06	1.84086e+06	1.2596e+06	4.13976e+06	2.60061e+06	2.41525e+06	996811	1.01337e+06	1.24693e+06	1.49199e+06	1.02891e+06	1.19549e+06	2.06993	1.04958	0.00679546	0.972222	1.64225	up
Com_144_pos	Methyl indole-3-acetate	--	C11 H11 N O2	189.079	10.451	--	--	HMDB0029738	--	Organoheterocyclic compounds	Indoles and derivatives	Indolyl carboxylic acids and derivatives	--	--	--	Full match	Full match	Full match	1282302124	1197956726	1100942180	4.95172e+08	1318875462	8.58324e+08	583622472	5.77255e+08	461956643	4.82032e+08	5.71337e+08	4.62146e+08	1.99263	0.994675	0.00692372	0.916667	1.40679	up
Com_10989_pos	2,3-Dinor-TXB2	--	C18 H30 O6	342.203	11.556	--	--	HMDB0002904	LMFA03030003	Lipids and lipid-like molecules	Fatty Acyls	Eicosanoids	Fatty Acyls [FA]	Eicosanoids [FA03]	Thromboxanes [FA0303]	No results	No results	Full match	1.27138e+06	1.26348e+06	1.18739e+06	391553	1.48581e+06	661205	357899	375683	348461	440730	374284	390717	2.73664	1.45241	0.006969	0.972222	1.47656	up
Com_4596_pos	β-Cortolone	--	C21 H34 O5	348.23	11.858	--	--	--	--	--	--	--	--	--	--	Invalid mass	No results	No results	1.11554e+07	1.03523e+07	8.99892e+06	4.79673e+06	9.87944e+06	5.83891e+06	4.37659e+06	4.95425e+06	5.31079e+06	5.19642e+06	4.22054e+06	4.18473e+06	1.80651	0.853202	0.00980901	0.916667	1.30225	up
Com_9075_pos	Prostaglandin B2	Prostaglandin B2; PGB2	C20 H30 O4	334.214	11.214	cpd:C05954	map00590 Arachidonic acid metabolism;map01100 Metabolic pathways;map04726 Serotonergic synapse	HMDB0004236	LMFA03010018	Lipids and lipid-like molecules	Fatty Acyls	Eicosanoids	Fatty Acyls [FA]	Eicosanoids [FA03]	Prostaglandins [FA0301]	No results	No results	Full match	1.11188e+06	2.18202e+06	2.92985e+06	1.55452e+06	1.44319e+06	2.07495e+06	1.08604e+06	963981	1.08899e+06	1.0805e+06	951592	980476	1.83634	0.876835	0.00996701	1	1.88295	up
Com_2731_pos	L-Kynurenine	L-Kynurenine; 3-Anthraniloyl-L-alanine	C10 H12 N2 O3	208.084	5.236	cpd:C00328	map00380 Tryptophan metabolism;map01100 Metabolic pathways;map05143 African trypanosomiasis	HMDB0000684	--	Organic oxygen compounds	Organooxygen compounds	Carbonyl compounds	--	--	--	Full match	No results	Full match	2.14978e+07	2.39275e+07	2.88966e+07	1.81427e+07	2.35449e+07	1.81187e+07	8.77923e+06	1.02111e+07	1.46634e+07	1.25151e+07	1.45345e+07	3.74182e+06	2.08128	1.05747	0.0101574	1	1.48825	up
Com_2069_pos	Prostaglandin A2	Prostaglandin A2; PGA2; Medullin	C20 H30 O4	334.214	11.855	cpd:C05953	map00590 Arachidonic acid metabolism;map01100 Metabolic pathways;map04726 Serotonergic synapse	HMDB0002752	LMFA03010035	Lipids and lipid-like molecules	Fatty Acyls	Eicosanoids	Fatty Acyls [FA]	Eicosanoids [FA03]	Prostaglandins [FA0301]	Full match	No results	Full match	1.83643e+07	1.85323e+07	18901021	9.28089e+06	1.67885e+07	1.3978e+07	1.01965e+07	1.04861e+07	1.02795e+07	1.12544e+07	9.07532e+06	9.81234e+06	1.56855	0.649433	0.0118969	0.861111	1.25911	up
Com_5782_pos	LPC 14:1	--	C22 H44 N O7 P	465.285	13.873	--	--	--	LMGP01050014	--	--	--	Glycerophospholipids [GP]	Glycerophosphocholines [GP01]	Monoacylglycerophosphocholines [GP0105]	No results	Full match	No results	7.22238e+06	6.25709e+06	6.49938e+06	3.31653e+06	6.64235e+06	4.41542e+06	3.15097e+06	3.17962e+06	3.73442e+06	3.68099e+06	3.62601e+06	3.75104e+06	1.62634	0.701625	0.0131123	0.888889	1.53314	up
Com_1355_pos	7-methyl-3-nitroimidazo[1,2-a]pyridine	--	C8 H7 N3 O2	199.033	1.231	--	--	--	--	--	--	--	--	--	--	Invalid mass	No results	No results	7.90011e+07	6.51277e+07	5.23184e+07	4.83511e+07	6.76055e+07	5.42838e+07	4.13467e+07	4.46797e+07	4.54509e+07	1.84305e+07	4.08351e+07	2.1995e+07	1.72366	0.785474	0.013187	1	1.52526	up
Com_2977_pos	Celestolide	--	C17 H24 O	244.182	13.465	--	--	HMDB0031867	--	Benzenoids	Indanes	_	--	--	--	Full match	No results	No results	1.09582e+07	1.80207e+07	2.51023e+07	1.02918e+07	1.47463e+07	1.80356e+07	1.03834e+07	1.00982e+07	8.10917e+06	9.09985e+06	1.0536e+07	8.26295e+06	1.71987	0.782301	0.0132449	0.944444	1.79368	up
Com_1762_pos	Isoquinoline	Isoquinoline; 2-Benzazine; Benzo[c]pyridine	C9 H7 N	129.058	9.193	cpd:C06323	--	HMDB0034244	--	Organoheterocyclic compounds	Isoquinolines and derivatives	_	--	--	--	Full match	No results	No results	4.99689e+07	5.00131e+07	4.75929e+07	2.17457e+07	5.17214e+07	3.9727e+07	2.59861e+07	2.55051e+07	2.41481e+07	2.45072e+07	2.54891e+07	2.54431e+07	1.72605	0.787471	0.0135337	0.833333	1.53732	up
Com_7229_pos	19-Norethisterone	Norethindrone; 19-Norethisterone; 19-Nor-17alpha-ethynyl-17beta-hydroxy-4-androsten-3-one	C20 H26 O2	298.193	11.86	cpd:C05028	--	HMDB0014855	--	Lipids and lipid-like molecules	Steroids and steroid derivatives	Estrane steroids	--	--	--	No results	No results	Full match	3.49261e+06	3.24774e+06	2.71759e+06	1.46436e+06	3.00438e+06	2.29808e+06	1.90961e+06	1.80072e+06	1.6075e+06	1.3707e+06	1.45428e+06	1.71707e+06	1.64553	0.718555	0.0135932	0.888889	1.38926	up
Com_8085_pos	5alpha-Pregnane-3,20-dione	5alpha-Pregnane-3,20-dione; 5alpha-Dihydroprogesterone	C21 H32 O2	316.24	12.913	cpd:C03681	map00140 Steroid hormone biosynthesis	HMDB0003759	LMST02030170	Lipids and lipid-like molecules	Steroids and steroid derivatives	Pregnane steroids	Sterol Lipids [ST]	Steroids [ST02]	C21 steroids (gluco/mineralocorticoids, progestogins) and derivatives [ST0203]	No results	No results	Full match	3.67585e+06	2.9316e+06	2.23368e+06	959077	3.12206e+06	1.92408e+06	1.14348e+06	929880	1.21569e+06	1.22331e+06	1.10542e+06	1.04861e+06	2.22704	1.15513	0.0138165	0.861111	1.27391	up
Com_3596_pos	Isoproterenol	Isoproterenol; Isoprenaline	C11 H17 N O3	211.121	11.012	cpd:C07056	map04261 Adrenergic signaling in cardiomyocytes	--	--	--	--	--	--	--	--	No results	No results	Full match	566648	2.97137e+06	4.77167e+06	2.67664e+06	1.46538e+06	4.02439e+06	8.33498e+06	7.93039e+06	6.63181e+06	6.88544e+06	7.41032e+06	6.37828e+06	0.378141	-1.403	0.0144362	1	1.45736	down
Com_11929_pos	23-Nordeoxycholic acid	--	C23 H38 O4	378.277	11.58	--	--	--	--	--	--	--	--	--	--	No results	No results	Full match	495329	698394	1.13992e+06	176145	501432	829424	180207	229243	253638	192358	218226	238594	2.92672	1.54929	0.0153395	0.833333	1.44327	up
Com_1488_pos	LPE 22:5	--	C27 H46 N O7 P	527.3	14.622	--	--	--	LMGP02050070	--	--	--	Glycerophospholipids [GP]	Glycerophosphoethanolamines [GP02]	Monoacylglycerophosphoethanolamines [GP0205]	No results	Full match	No results	1.5225e+07	1.55354e+07	1.77968e+07	3.78044e+07	1.43562e+07	2.01809e+07	4.9772e+07	3.86442e+07	2.1012e+07	3.96211e+07	2.61037e+07	3.04824e+07	0.587927	-0.766291	0.0179859	0.916667	1.27951	down
Com_1005_pos	Indole-3-acrylic acid	--	C11 H9 N O2	187.063	9.197	--	--	--	--	--	--	--	--	--	--	Full match	No results	Full match	1.10092e+08	1.11285e+08	1.06778e+08	3.49868e+07	1.14692e+08	7.7816e+07	4.66862e+07	4.80814e+07	4.62987e+07	4.37959e+07	4.38753e+07	4.32993e+07	2.04256	1.03038	0.0192012	0.833333	1.33813	up
Com_9568_pos	Morphine	Morphine	C17 H19 N O3	285.136	12.938	cpd:C01516	map00982 Drug metabolism - cytochrome P450;map01100 Metabolic pathways;map04080 Neuroactive ligand-receptor interaction	HMDB0014440	--	Alkaloids and derivatives	Morphinans	_	--	--	--	Full match	No results	No results	1.68035e+06	1.06023e+06	1.04856e+06	2.22247e+06	1.34142e+06	1.28581e+06	1.09828e+06	1.01541e+06	629935	961671	1.0439e+06	898363	1.52966	0.613208	0.0204002	0.944444	1.40301	up
Com_7581_pos	11-Ketoetiocholanolone	11-Ketoetiocholanolone; 3alpha-Hydroxy-5beta-androstane-11,17-dione	C19 H28 O3	304.203	13.36	cpd:C14552	--	HMDB0006031	LMST02020087	Lipids and lipid-like molecules	Steroids and steroid derivatives	Androstane steroids	Sterol Lipids [ST]	Steroids [ST02]	C19 steroids (androgens) and derivatives [ST0202]	No results	No results	Full match	4.20325e+06	1.95113e+06	3.81091e+06	1.41023e+06	2.37844e+06	1.64276e+06	1.21961e+06	1.47505e+06	1.41473e+06	1.12428e+06	1.39957e+06	1.19641e+06	1.96646	0.975603	0.020889	0.944444	1.23423	up
Com_3318_pos	tetranor-12(R)-HETE	--	C16 H26 O3	248.177	13.486	--	--	--	--	--	--	--	--	--	--	Invalid mass	No results	No results	1.98436e+07	1.46943e+07	1.06191e+07	6.62664e+06	1.4359e+07	9.02264e+06	8.17395e+06	5.51704e+06	6.96919e+06	7.11168e+06	7.06723e+06	7.51757e+06	1.77458	0.827478	0.0217118	0.861111	1.18164	up
Com_4088_pos	N-[4-(Aminosulfonyl)phenyl]-5-(morpholinosulfonyl)-2-furamide	--	C15 H17 N3 O7 S2	432.077	10.453	--	--	--	--	--	--	--	--	--	--	Invalid mass	No results	No results	6.50204e+06	7.82467e+06	6.44888e+06	1.66603e+06	1.28892e+07	6.17336e+06	2.96363e+06	2.99409e+06	1.95462e+06	2.52117e+06	2.71151e+06	1.76427e+06	2.78378	1.47704	0.022309	0.833333	1.02976	up
Com_7883_pos	AL 8810	--	C24 H31 F O4	424.207	11.403	--	--	--	--	--	--	--	--	--	--	Invalid mass	No results	No results	249300	611000	1.12883e+06	1.12283e+06	521893	1.17269e+06	1.48973e+06	1.57301e+06	1.75673e+06	1.56976e+06	1.46957e+06	1.60001e+06	0.508154	-0.976662	0.0230533	1	1.16849	down
Com_472_pos	Indole-3-lactic acid	--	C11 H11 N O3	205.074	9.176	--	--	HMDB0000671	--	Organoheterocyclic compounds	Indoles and derivatives	Indolyl carboxylic acids and derivatives	--	--	--	Full match	Full match	Full match	3.52657e+08	3.56069e+08	348394566	1.15071e+08	3.67375e+08	2.63786e+08	1.61948e+08	1.62032e+08	1.53028e+08	1.54573e+08	1.57118e+08	1.46018e+08	1.9293	0.94808	0.024259	0.833333	1.45869	up
Com_7030_pos	Estradiol	Estradiol-17beta; Estradiol; beta-Estradiol	C18 H24 O2	272.177	12.134	cpd:C00951	map00140 Steroid hormone biosynthesis;map01100 Metabolic pathways;map01522 Endocrine resistance;map04913 Ovarian steroidogenesis;map04915 Estrogen signaling pathway;map04917 Prolactin signaling pathway;map04961 Endocrine and other factor-regulated calcium reabsorption;map05200 Pathways in cancer;map05215 Prostate cancer;map05224 Breast cancer	HMDB0000151	--	Lipids and lipid-like molecules	Steroids and steroid derivatives	Estrane steroids	--	--	--	No results	No results	Full match	1.24382e+06	3.18538e+06	5.15607e+06	1.86823e+06	1.14015e+06	2.98862e+06	1.24536e+06	1.27205e+06	1.02934e+06	873341	874213	1.16548e+06	2.4122	1.27035	0.0251513	0.861111	1.5101	up
Com_960_pos	L-Methionine	L-Methionine; Methionine; L-2-Amino-4methylthiobutyric acid	C5 H11 N O2 S	149.051	2.027	cpd:C00073	map00270 Cysteine and methionine metabolism;map00970 Aminoacyl-tRNA biosynthesis;map01100 Metabolic pathways;map01210 2-Oxocarboxylic acid metabolism;map01230 Biosynthesis of amino acids;map01523 Antifolate resistance;map04974 Protein digestion and absorption;map04978 Mineral absorption;map05230 Central carbon metabolism in cancer	HMDB0000696	--	Organic acids and derivatives	Carboxylic acids and derivatives	Amino acids, peptides, and analogues	--	--	--	No results	No results	Full match	8.31786e+07	5.8907e+07	3.87966e+07	119615999	9.81251e+07	8.12377e+07	3.10829e+07	3.28308e+07	5.75312e+07	6.26914e+07	3.0978e+07	5.46125e+07	1.77906	0.831117	0.0257391	0.888889	1.36809	up
Com_348_pos	Acetyl-L-carnitine	--	C9 H17 N O4	203.115	1.854	--	--	HMDB0000201	LMFA07070050	Lipids and lipid-like molecules	Fatty Acyls	Fatty acid esters	Fatty Acyls [FA]	Fatty esters [FA07]	Fatty acyl carnitines [FA0707]	Full match	Full match	Full match	63454566	2.25408e+08	1.22739e+08	2.61098e+08	1.97049e+08	1.84936e+08	3.17029e+08	3.14476e+08	2.86692e+08	3.89287e+08	274547969	2.73949e+08	0.568263	-0.81537	0.0264175	1	1.42434	down
Com_9381_pos	Ip7G	--	C16 H23 N5 O5	365.169	9.602	--	--	--	--	--	--	--	--	--	--	No results	No results	Full match	122160	501145	876117	404780	285676	813007	1.1201e+06	1.23338e+06	893793	1.0415e+06	979011	1.00209e+06	0.478939	-1.06209	0.0270202	1	1.18983	down
Com_9026_pos	(2E)-6-hydroxy-2-methyl-6-(4-methylphenyl)hept-2-enoic acid	--	C15 H20 O3	230.13	11.475	--	--	--	--	--	--	--	--	--	--	Invalid mass	No results	No results	2.82464e+06	2.4748e+06	1.2724e+06	1.45515e+06	1.99192e+06	1.26174e+06	1.24134e+06	1.05495e+06	1.13311e+06	1.38341e+06	1.25027e+06	955097	1.60735	0.684681	0.0277278	0.944444	1.51952	up
Com_7492_pos	PC (18:1/20:5)	--	C46 H80 N O8 P	805.56	12.481	--	--	--	LMGP01010907	--	--	--	Glycerophospholipids [GP]	Glycerophosphocholines [GP01]	Diacylglycerophosphocholines [GP0101]	No results	Full match	No results	905595	1.46651e+06	527218	782765	1.05101e+06	1.93989e+06	3.00909e+06	2.80389e+06	794302	1.73256e+06	2.11785e+06	3.18618e+06	0.489083	-1.03185	0.0324795	0.861111	1.39204	down
Com_1578_pos	DL-2-(acetylamino)-3-phenylpropanoic acid	--	C11 H13 N O3	207.089	9.281	--	--	--	--	--	--	--	--	--	--	Full match	Full match	Full match	5.94941e+07	5.29047e+07	4.26223e+07	2.56433e+07	6.01543e+07	3.67496e+07	2.91054e+07	2.78807e+07	3.22261e+07	3.28408e+07	2.69108e+07	3.12544e+07	1.54018	0.623099	0.0326817	0.833333	1.27735	up
Com_11763_pos	Tetrahydroaldosterone	--	C21 H32 O5	364.225	10.216	--	--	--	--	--	--	--	--	--	--	No results	No results	Full match	1.1799e+06	762390	503343	205313	942323	332582	248143	270744	264271	219786	257244	249005	2.60129	1.37923	0.032694	0.833333	1.06197	up
Com_5871_pos	4-oxo-5-phenylpentanoic acid	--	C11 H12 O3	192.079	8.125	--	--	--	--	--	--	--	--	--	--	Full match	No results	No results	3.93311e+06	5.58059e+06	7.22701e+06	2.72387e+06	5.02926e+06	5.40369e+06	2.90248e+06	2.84204e+06	3.70286e+06	3.5475e+06	2.80234e+06	3.57739e+06	1.54313	0.625858	0.0334488	0.833333	1.26032	up
Com_5305_pos	Chenodeoxycholic acid-3-beta-D-glucuronide	--	C30 H48 O10	568.324	13.407	--	--	--	--	--	--	--	--	--	--	No results	No results	Full match	1.52307e+06	4.51768e+06	8.89649e+06	653190	2.74347e+06	4.5705e+06	1.17494e+06	1.00948e+06	924714	870832	841762	979534	3.94817	1.98119	0.0357508	0.833333	1.3015	up
Com_2556_pos	Maltotetraose	Maltotetraose	C24 H42 O21	688.204	1.323	cpd:C02052	--	HMDB0001296	--	Organic oxygen compounds	Organooxygen compounds	Carbohydrates and carbohydrate conjugates	--	--	--	Invalid mass	No results	No results	2.05245e+06	2.72687e+06	1.98405e+06	2.84091e+07	2.29216e+06	1.25784e+07	1.18578e+06	1.54794e+06	1.6291e+06	1.14875e+06	933578	1.33043e+06	6.43592	2.68615	0.0394783	1	1.81121	up
Com_5417_pos	Capryloylglycine	--	C10 H19 N O3	201.136	11.584	--	--	HMDB0000832	--	Organic acids and derivatives	Carboxylic acids and derivatives	Amino acids, peptides, and analogues	--	--	--	Full match	No results	No results	1.1843e+06	1.30306e+06	1.0786e+06	6.05097e+06	1.27012e+06	3.35507e+06	4.71124e+06	4.86492e+06	3.83745e+06	3.65317e+06	4.21467e+06	3.56566e+06	0.57319	-0.802915	0.0412515	0.833333	1.35775	down
Com_12351_pos	7-(2-aminophenyl)heptanoic acid	--	C13 H19 N O2	243.125	12.861	--	--	--	--	--	--	--	--	--	--	Invalid mass	No results	No results	898164	723274	714782	333261	772089	367831	452587	375971	458473	375405	272554	383534	1.64303	0.716357	0.0499345	0.722222	1.33504	up
Compound_ID	Name	Other_name(Kegg_name)	Formula	Molecular Weight	RT [min]	Kegg_ID	KEGG_pathway	HMDB_ID	Lipidmaps_ID	SuperClass(HMDB)	Class(HMDB)	SubClass(HMDB)	CATEGORY(Lipidmaps)	MAIN_CLASS(Lipidmaps)	SUB_CLASS(Lipidmaps)	mzCloud_Results	mzVault_Results	MassList_Results	pos_UUO1	pos_UUO2	pos_UUO3	pos_UUO4	pos_UUO5	pos_UUO6	pos_SKI_L1	pos_SKI_L2	pos_SKI_L3	pos_SKI_L4	pos_SKI_L5	pos_SKI_L6	FC	log2FC	Pvalue	ROC	VIP	Up.Down
Com_867_pos	3-(3-nitrophenyl)-1H-pyrazole	--	C9 H7 N3 O2	189.057	11.965	--	--	--	--	--	--	--	--	--	--	Invalid mass	No results	No results	264142	244955	290881	342339	396539	393951	9.19261e+07	1.43034e+08	1.00238e+08	1.24664e+08	1.31313e+08	1.13815e+08	0.00274161	-8.51076	2.59e-13	1	1.60266	down
Com_6938_pos	3-methoxy-2-phenyl-4H-furo[2,3-h]chromen-4-one	--	C18 H12 O4	292.073	11.741	--	--	--	--	--	--	--	--	--	--	Full match	No results	No results	122468	132889	133043	125864	125404	135308	3.76965e+06	4.5723e+06	4.45316e+06	4.51255e+06	4.51308e+06	3.93941e+06	0.0300843	-5.05484	2.04e-12	1	1.57683	down
Com_5290_pos	1H-indol-3-yl(pyridin-2-yl)methanol	--	C14 H12 N2 O	206.084	12.256	--	--	--	--	--	--	--	--	--	--	Invalid mass	No results	No results	199815	179264	160160	184018	197994	174682	5.66623e+06	7.90939e+06	6.19721e+06	7.60491e+06	7.13907e+06	5.80946e+06	0.0271767	-5.20149	1.61e-11	1	1.63685	down
Com_4068_pos	Phlorizin	Phlorizin; Phlorhizin; Phloridzin	C21 H24 O10	458.123	11.851	cpd:C01604	--	HMDB0036634	--	Phenylpropanoids and polyketides	Flavonoids	Flavonoid glycosides	--	--	--	Invalid mass	No results	No results	102479	186446	125439	109143	105750	121122	6.07461e+06	9.44882e+06	6.42376e+06	8.54901e+06	7.81017e+06	7.18002e+06	0.0164968	-5.92167	2.21e-11	1	1.46508	down
Com_8281_pos	(2E)-3-(3,4-dimethoxyphenyl)prop-2-enoic acid	--	C11 H12 O4	190.065	11.966	--	--	HMDB0034315	--	Phenylpropanoids and polyketides	Cinnamic acids and derivatives	Hydroxycinnamic acids and derivatives	--	--	--	Invalid mass	No results	No results	112483	110570	116827	120124	119088	137930	2.62899e+06	3.10295e+06	2.10775e+06	3.07237e+06	3.22841e+06	2.39857e+06	0.0433533	-4.52772	1.18e-09	1	1.67844	down
Com_6264_pos	Estrone	Estrone; 3-Hydroxy-1,3,5(10)-estratrien-17-one	C18 H22 O2	252.151	12.651	cpd:C00468	map00140 Steroid hormone biosynthesis;map01100 Metabolic pathways;map04913 Ovarian steroidogenesis;map04917 Prolactin signaling pathway	HMDB0000145	LMST02010004	Lipids and lipid-like molecules	Steroids and steroid derivatives	Estrane steroids	Sterol Lipids [ST]	Steroids [ST02]	C18 steroids (estrogens) and derivatives [ST0201]	Invalid mass	No results	No results	619332	606053	662910	460267	643944	581087	4.67633e+06	5.42303e+06	3.70314e+06	5.27708e+06	5.70337e+06	3.97395e+06	0.124269	-3.00846	1.72e-09	1	1.4567	down
Com_12333_pos	6-(3-hydroxybutan-2-yl)-5-(hydroxymethyl)-4-methoxy-2H-pyran-2-one	--	C11 H16 O5	250.085	10.511	--	--	--	--	--	--	--	--	--	--	Invalid mass	No results	No results	177087	171349	184872	124538	189304	154529	923667	626307	760682	775248	825527	816118	0.211881	-2.23867	6.23e-09	1	1.4733	down
Com_3240_pos	Valsartan metabolite	--	C14 H10 N4 O2	266.08	10.64	--	--	--	--	--	--	--	--	--	--	Full match	No results	No results	85479.7	87516.3	89885.1	76919.7	83948.4	84258	1.60117e+07	9.68459e+06	9.15097e+06	1.42572e+07	1.43985e+07	1.16989e+07	0.00675524	-7.20978	1.2e-08	1	1.49247	down
Com_770_pos	Asp-Phe methyl ester	--	C14 H18 N2 O5	294.121	7.977	--	--	--	--	--	--	--	--	--	--	No results	No results	Full match	1.49075e+08	1.64218e+08	1.67171e+08	1.61446e+08	1.6798e+08	1.83196e+08	1.0342e+08	8.71736e+07	9.21577e+07	1.00201e+08	1.01139e+08	9.4549e+07	1.71624	0.779255	6e-08	1	1.98837	up
Com_6498_pos	N1-(1H-1,2,4-triazol-3-yl)-2-hydroxybenzamide	--	C9 H8 N4 O2	204.067	7.995	--	--	--	--	--	--	--	--	--	--	Invalid mass	No results	No results	100297	99437.5	106504	94115.5	96047.2	104248	6.02857e+06	3.89851e+06	2.47512e+06	4.85631e+06	5.25069e+06	3.87577e+06	0.0227648	-5.45705	5.75e-07	1	1.60295	down
Com_3878_pos	PC (9:0/9:0)	--	C26 H52 N O8 P	537.342	13.571	--	--	--	LMGP01011270	--	--	--	Glycerophospholipids [GP]	Glycerophosphocholines [GP01]	Diacylglycerophosphocholines [GP0101]	No results	Full match	No results	1.183e+07	1.20085e+07	1.57001e+07	8.90678e+06	1.27301e+07	1.20287e+07	4.21478e+06	4.4219e+06	3.77711e+06	4.28829e+06	2.60775e+06	3.53966e+06	3.20376	1.67976	9.33e-07	1	1.93233	up
Com_7499_pos	N3-(2-morpholinophenyl)-2-oxo-2H-chromene-3-carboxamide	--	C20 H18 N2 O4	368.136	11.964	--	--	--	--	--	--	--	--	--	--	Invalid mass	No results	No results	218826	215103	227276	219341	231674	220212	1.99679e+06	4.13137e+06	2.41191e+06	3.10995e+06	3.34828e+06	3.14373e+06	0.0734445	-3.7672	1.67e-06	1	1.72281	down
Com_4130_pos	Hydroxyhomosildenafil	--	C23 H32 N6 O5 S	504.218	5.841	--	--	HMDB0060932	--	Benzenoids	Benzene and substituted derivatives	Benzenesulfonamides	--	--	--	Full match	No results	No results	1.24895e+07	1.08131e+07	9.09825e+06	9.7738e+06	1.26826e+07	1.14542e+07	5.39969e+06	4.58977e+06	6.23015e+06	5.39978e+06	4.91502e+06	5.97103e+06	2.04001	1.02858	2.01e-06	1	1.6171	up
Com_3209_pos	Avocadyne 1-acetate	--	C19 H34 O4	308.234	14.03	--	--	HMDB0031048	LMFA05000644	Lipids and lipid-like molecules	Fatty Acyls	Fatty alcohols	Fatty Acyls [FA]	Fatty alcohols [FA05]	_	Invalid mass	No results	No results	2.0989e+07	1.50865e+07	1.10122e+07	1.20288e+07	1.8501e+07	1.22638e+07	2.84067e+06	4.30307e+06	5.01884e+06	4.11368e+06	3.65228e+06	4.0181e+06	3.7534	1.9082	3.19e-06	1	1.94819	up
Com_3570_pos	Phenylpyruvic Acid	Phenylpyruvate; Phenylpyruvic acid; alpha-Ketohydrocinnamic acid; keto-Phenylpyruvate; 3-Phenyl-2-oxopropanoate; 2-Oxo-3-phenylpropanoate	C9 H8 O3	164.047	8.879	cpd:C00166	map00360 Phenylalanine metabolism;map00400 Phenylalanine, tyrosine and tryptophan biosynthesis;map01100 Metabolic pathways;map01210 2-Oxocarboxylic acid metabolism;map01230 Biosynthesis of amino acids	HMDB0000205	--	Benzenoids	Benzene and substituted derivatives	Phenylpyruvic acid derivatives	--	--	--	No results	No results	Full match	1.72927e+07	1.29663e+07	1.33614e+07	8.27993e+06	1.44488e+07	1.3335e+07	2.67737e+06	1.97523e+06	4.39727e+06	1.91915e+06	2.61084e+06	3.32646e+06	4.71327	2.23673	3.48e-06	1	1.97024	up
Com_4014_pos	Phenylpropiolic acid	--	C9 H6 O2	146.037	8.88	--	--	HMDB0002359	--	Benzenoids	Benzene and substituted derivatives	_	--	--	--	No results	No results	Full match	1.40495e+07	1.03268e+07	1.09725e+07	6.52495e+06	1.12232e+07	1.04571e+07	1.81288e+06	1.37035e+06	3.26418e+06	1.36948e+06	1.82047e+06	2.47281e+06	5.24799	2.39177	3.77e-06	1	1.9799	up
Com_6734_pos	3-(propan-2-yl)-octahydropyrrolo[1,2-a]pyrazine-1,4-dione	--	C10 H16 N2 O2	196.121	7.758	--	--	--	--	--	--	--	--	--	--	Full match	No results	No results	4.71617e+06	5.32992e+06	3.56646e+06	3.59907e+06	4.46761e+06	3.69309e+06	1.99049e+06	1.46606e+06	2.18906e+06	1.29873e+06	1.76179e+06	1.51176e+06	2.48313	1.31216	7.34e-06	1	1.66729	up
Com_8465_pos	4-Methoxycinnamic Acid	--	C10 H10 O3	178.063	8.882	--	--	HMDB0002040	--	Phenylpropanoids and polyketides	Cinnamic acids and derivatives	Cinnamic acids	--	--	--	No results	No results	Full match	2.85198e+06	2.36648e+06	2.58179e+06	1.86277e+06	3.09914e+06	1.88208e+06	984655	869216	1.02033e+06	744316	890063	867577	2.72392	1.44569	1.14e-05	1	1.85173	up
Com_295_pos	Trigonelline	N-Methylnicotinate; Trigonelline; Trigenelline; 1-Methylpyridinio-3-carboxylate; Betaine nicotinate; Caffearin; Gynesine	C7 H7 N O2	115.063	1.326	cpd:C01004	map00760 Nicotinate and nicotinamide metabolism	HMDB0000875	--	Alkaloids and derivatives	_	_	--	--	--	Invalid mass	No results	No match	6.27396e+08	679155902	740527956	6.23423e+08	6.48371e+08	6.87898e+08	3.74492e+08	3.72446e+08	4.73684e+08	3.34598e+08	3.83087e+08	4.18325e+08	1.70021	0.765714	1.31e-05	1	1.60826	up
Com_1176_pos	PC (4:0/16:3)	--	C28 H50 N O8 P	559.327	13.534	--	--	--	--	--	--	--	--	--	--	No results	Full match	No results	5.58299e+07	9.60684e+07	1.00992e+08	8.39122e+07	6.89183e+07	9.06094e+07	2.44246e+07	2.74452e+07	4.04683e+07	3.85143e+07	2.69757e+07	3.06163e+07	2.63383	1.39716	1.64e-05	1	1.88143	up
Com_1659_pos	4-(acetylamino)phenyl 3-chlorobenzoate	--	C15 H12 Cl N O3	327.004	8.35	--	--	--	--	--	--	--	--	--	--	Invalid mass	No results	No results	1.74619e+07	1.44502e+07	1.33822e+07	1.12659e+07	1.38241e+07	1.11194e+07	5.37683e+07	3.65602e+07	2.63399e+07	5.31997e+07	4.62075e+07	4.11834e+07	0.316815	-1.65829	1.71e-05	1	1.85194	down
Com_6057_pos	Guggulsterone	--	C21 H28 O2	312.208	12.763	--	--	HMDB0002726	--	Lipids and lipid-like molecules	Steroids and steroid derivatives	Androstane steroids	--	--	--	No results	No results	Full match	5.29832e+06	5.64554e+06	6.93932e+06	1.96935e+06	5.24837e+06	5.96168e+06	520770	1.29864e+06	862075	646054	838909	805636	6.2474	2.64326	2.3e-05	1	1.41051	up
Com_804_pos	PC (4:0/18:5)	--	C30 H50 N O8 P	583.327	13.502	--	--	--	--	--	--	--	--	--	--	No results	Full match	No results	8.6215e+07	1.58232e+08	1.46642e+08	1.34157e+08	1.10642e+08	1.44619e+08	2.95167e+07	3.75891e+07	6.46432e+07	5.26185e+07	3.51293e+07	45874653	2.94119	1.5564	3.35e-05	1	1.70267	up
Com_6830_pos	D-Glucosamine	D-Glucosamine; Chitosamine; 2-Amino-2-deoxy-D-glucose	C6 H13 N O5	179.079	8.349	cpd:C00329	map00520 Amino sugar and nucleotide sugar metabolism;map01100 Metabolic pathways	HMDB0001514	--	Organic oxygen compounds	Organooxygen compounds	Carbohydrates and carbohydrate conjugates	--	--	--	No results	No results	Full match	1.42648e+06	1.28957e+06	1.43099e+06	1.03609e+06	1.49156e+06	1.0308e+06	4.45853e+06	3.09357e+06	2.25318e+06	4.67048e+06	4.00597e+06	3.91637e+06	0.344024	-1.53942	3.56e-05	1	1.87368	down
Com_2599_pos	L-Saccharopine	N6-(L-1,3-Dicarboxypropyl)-L-lysine; Saccharopine; L-Saccharopine; N-[(S)-5-Amino-5-carboxypentyl]-L-glutamic acid	C11 H20 N2 O6	276.133	12.408	cpd:C00449	map00310 Lysine degradation;map01100 Metabolic pathways;map01230 Biosynthesis of amino acids	HMDB0000279	--	Organic acids and derivatives	Carboxylic acids and derivatives	Amino acids, peptides, and analogues	--	--	--	No results	No results	Full match	2.14093e+07	2.22108e+07	2.195e+07	1.19012e+07	2.80412e+07	2.23204e+07	5.91849e+06	7.49507e+06	9.11827e+06	5.89642e+06	6.82138e+06	6.47415e+06	3.06379	1.61532	3.95e-05	1	1.22782	up
Com_8915_pos	ethyl 4-({3-[5-(trifluoromethyl)-2-pyridyl]prop-2-ynyl}oxy)benzoate	--	C18 H14 F3 N O3	349.096	11.726	--	--	--	--	--	--	--	--	--	--	Invalid mass	No results	No results	2.86392e+06	2.86753e+06	2.18328e+06	1.8311e+06	2.41054e+06	1.80675e+06	1.06857e+06	1.05554e+06	1.07188e+06	885061	1.10318e+06	947302	2.27727	1.1873	5.97e-05	1	1.74679	up
Com_8604_pos	N1-methyl-5-methoxy-2-({2-[(methylamino)carbonyl]phenyl}thio)benzamide	--	C17 H18 N2 O3 S	352.092	10.704	--	--	--	--	--	--	--	--	--	--	Invalid mass	No results	No results	93176.1	153054	218959	165512	104635	189034	270547	625946	610170	731214	623780	661445	0.262374	-1.93031	6.04e-05	1	1.0457	down
Com_7498_pos	LSD-d3	--	C20 H22 [2]H3 N3 O	326.224	13.572	--	--	--	--	--	--	--	--	--	--	Invalid mass	No results	No results	3.77693e+06	4.23314e+06	4.20807e+06	2.31515e+06	3.52824e+06	3.47139e+06	1.2934e+06	1.51031e+06	1.45008e+06	1.4918e+06	2.23814e+06	1.76309e+06	2.20922	1.14354	6.81e-05	1	1.65652	up
Com_7470_pos	methyl isoquinoline-3-carboxylate	--	C11 H9 N O2	187.06	5.673	--	--	--	--	--	--	--	--	--	--	Invalid mass	No results	No results	4.33803e+06	3.58413e+06	4.51848e+06	2.59187e+06	3.69533e+06	3.11215e+06	1.90119e+06	1.89352e+06	1.99296e+06	1.38282e+06	1.83482e+06	1.6505e+06	2.04958	1.03533	8.1e-05	1	1.84001	up
Com_9385_pos	RPK	--	C17 H33 N7 O4	399.262	11.349	--	--	--	--	--	--	--	--	--	--	Invalid mass	No results	No results	1.07671e+06	1.63182e+06	2.66385e+06	1.1007e+06	1.48481e+06	1.99369e+06	420948	433550	786095	437665	463811	559716	3.20834	1.68183	0.000107464	1	1.77326	up
Com_6993_pos	4-cyclopropyl-6-(methylthio)-2-pyrazin-2-ylpyrimidine-5-carbonitrile	--	C13 H11 N5 S	269.072	8.43	--	--	--	--	--	--	--	--	--	--	Invalid mass	No results	No results	4.16603e+06	4.91216e+06	4.65357e+06	1.39966e+06	4.24115e+06	3.25406e+06	304746	389721	1.27552e+06	392279	420762	986886	6.0019	2.58542	0.000136829	1	1.67722	up
Com_606_pos	Taurohyocholic acid sodium salt	--	C26 H44 N Na O7 S	537.273	12.681	--	--	--	--	--	--	--	--	--	--	No results	No results	Full match	2.2362e+08	2.33598e+08	1.16132e+08	5.52843e+07	2.01178e+08	7.38429e+07	2.20194e+06	6.12362e+06	2.59299e+07	1.63812e+06	4.52493e+06	1.00708e+07	17.898	4.16172	0.000152251	1	1.71475	up
Com_9855_pos	2-(3,4-dimethoxyphenyl)ethanamine	--	C10 H15 N O2	181.11	11.93	--	--	HMDB0041806	--	Benzenoids	Benzene and substituted derivatives	Methoxybenzenes	--	--	--	No results	No results	Full match	2.22031e+06	2.17154e+06	1.79681e+06	1.23692e+06	2.05555e+06	1.40493e+06	526170	717127	1.2218e+06	610184	705628	636287	2.46447	1.30128	0.000162501	1	1.53652	up
Com_3911_pos	LPC 18:4	--	C26 H46 N O7 P	515.298	14.006	--	--	--	LMGP01050129	--	--	--	Glycerophospholipids [GP]	Glycerophosphocholines [GP01]	Monoacylglycerophosphocholines [GP0105]	No results	Invalid mass	No results	9.86482e+06	1.188e+07	1.55255e+07	9.51488e+06	1.15261e+07	1.48077e+07	5.12658e+06	6.77728e+06	7.09533e+06	6.76676e+06	7.29534e+06	5.94064e+06	1.87475	0.906701	0.000175959	1	1.80508	up
Com_10708_pos	NNK	4-(N-Nitrosomethylamino)-1-(3-pyridyl)-1-butanone; NNK	C14 H26 N6 O6	396.176	10.793	cpd:C16453	map00980 Metabolism of xenobiotics by cytochrome P450;map05204 Chemical carcinogenesis	HMDB0011603	--	Organic oxygen compounds	Organooxygen compounds	Carbonyl compounds	--	--	--	Invalid mass	No results	No results	298166	1.0569e+06	1.79374e+06	614049	723040	1.24033e+06	136587	79983.9	229488	95549.5	99462.4	141529	7.31692	2.87124	0.000194322	1	1.68009	up
Com_6571_pos	2,3,4,9-Tetrahydro-1H-β-carboline-3-carboxylic acid	--	C12 H12 N2 O2	216.09	7.884	--	--	--	--	--	--	--	--	--	--	Full match	No results	No results	4.74183e+06	4.99232e+06	5.06505e+06	3.98318e+06	4.98897e+06	5.93055e+06	2.29785e+06	3.37095e+06	3.0488e+06	2.34881e+06	3.06732e+06	3.43033e+06	1.69106	0.757929	0.000196964	1	1.46985	up
Com_8499_pos	4-hydroxy-5,8-dimethylquinoline-3-carboxylic acid	--	C12 H11 N O3	217.074	10.705	--	--	--	--	--	--	--	--	--	--	Full match	No results	No results	3.1833e+06	2.79702e+06	2.75724e+06	1.97069e+06	3.07349e+06	2.48545e+06	1.55161e+06	1.86987e+06	1.37401e+06	1.63741e+06	1.75992e+06	1.24314e+06	1.72396	0.785724	0.000201901	1	1.38182	up
Com_5225_pos	13-Hotre(R)	--	C18 H30 O3	294.219	13.417	--	--	--	--	--	--	--	--	--	--	No results	No results	Full match	8.78011e+06	6.03055e+06	5.59251e+06	2.75036e+06	6.80458e+06	3.81188e+06	1.08885e+06	1.55574e+06	1.40894e+06	1.77977e+06	1617858	1.4739e+06	3.78373	1.91981	0.000302494	1	1.86516	up
Com_2160_pos	9-Hpode	--	C18 H32 O4	312.229	14.029	--	--	HMDB0062434	LMFA02000012	Lipids and lipid-like molecules	Fatty Acyls	Lineolic acids and derivatives	Fatty Acyls [FA]	Octadecanoids [FA02]	Other Octadecanoids [FA0200]	No results	No results	Full match	4.0777e+07	2.75364e+07	1.56702e+07	2.60793e+07	3.64805e+07	2.29048e+07	4.14968e+06	1.69547e+07	6.4719e+06	5.33179e+06	7.23154e+06	5.73255e+06	3.69392	1.88515	0.000303989	0.972222	1.81656	up
Com_5415_pos	Xanthosine	Xanthosine	C10 H12 N4 O6	284.075	4.994	cpd:C01762	map00230 Purine metabolism;map00232 Caffeine metabolism;map01100 Metabolic pathways	HMDB0000299	--	Nucleosides, nucleotides, and analogues	Purine nucleosides	_	--	--	--	No results	No results	Full match	1.79892e+06	3.53571e+06	5.02395e+06	3.1569e+06	2.87025e+06	4.55758e+06	1.30679e+06	794252	1.48094e+06	1.11567e+06	1.10954e+06	1.30367e+06	2.94525	1.55839	0.000305468	1	1.49113	up
Com_843_pos	2-(acetylamino)-3-(1H-indol-3-yl)propanoic acid	--	C13 H14 N2 O3	246.1	9.232	--	--	--	--	--	--	--	--	--	--	Full match	Full match	No results	1.44415e+08	146148381	1.39358e+08	7.48183e+07	1.46871e+08	1.17572e+08	5.46761e+07	6.29188e+07	6.7606e+07	4.714e+07	6.76121e+07	5.42287e+07	2.17172	1.11884	0.000311234	1	1.76707	up
Com_9745_pos	Retinal	Retinal; Vitamin A aldehyde; Retinene; all-trans-Retinal; all-trans-Vitamin A aldehyde; all-trans-Retinene	C20 H28 O	284.214	12.872	cpd:C00376	map00830 Retinol metabolism;map01100 Metabolic pathways;map04744 Phototransduction;map04977 Vitamin digestion and absorption	HMDB0006220	LMPR01090002	Lipids and lipid-like molecules	Prenol lipids	Retinoids	Prenol Lipids [PR]	Isoprenoids [PR01]	Retinoids [PR0109]	No results	No results	Full match	929475	1.698e+06	2.15515e+06	1.18143e+06	1.28485e+06	1.48951e+06	715834	650433	419938	544008	835191	412236	2.44251	1.28836	0.00034474	1	1.37485	up
Com_4158_pos	GMP	GMP; Guanosine 5'-phosphate; Guanosine monophosphate; Guanosine 5'-monophosphate; Guanylic acid	C10 H14 N5 O8 P	363.056	1.331	cpd:C00144	map00230 Purine metabolism;map01100 Metabolic pathways;map01523 Antifolate resistance;map04022 cGMP-PKG signaling pathway;map04740 Olfactory transduction;map04742 Taste transduction;map04744 Phototransduction	HMDB0001397	--	Nucleosides, nucleotides, and analogues	Purine nucleotides	Purine ribonucleotides	--	--	--	No results	No results	Full match	2.62126e+06	4.20736e+06	6.1127e+06	3.48463e+06	3.70869e+06	6.00877e+06	9.53135e+06	8.08371e+06	1.2203e+07	8.96099e+06	9.37319e+06	1.26731e+07	0.429811	-1.21823	0.000503171	1	1.59959	down
Com_1165_pos	Glycocholic acid	Glycocholate; Glycocholic acid; 3alpha,7alpha,12alpha-Trihydroxy-5beta-cholan-24-oylglycine	C26 H43 N O6	465.308	12.819	cpd:C01921	map00120 Primary bile acid biosynthesis;map01100 Metabolic pathways;map04976 Bile secretion;map04979 Cholesterol metabolism	HMDB0000138	LMST05030001	Lipids and lipid-like molecules	Steroids and steroid derivatives	Bile acids, alcohols and derivatives	Sterol Lipids [ST]	Steroid conjugates [ST05]	Glycine conjugates [ST0503]	Full match	No results	No results	9.90979e+07	6.49608e+07	8.02737e+06	6.59577e+06	7.12995e+07	7.81163e+06	374377	709756	3.82177e+06	473230	493234	1.73936e+06	33.8679	5.08185	0.00059647	1	1.64803	up
Com_403_pos	Nicotinamide	Nicotinamide; Nicotinic acid amide; Niacinamide; Vitamin PP	C6 H6 N2 O	122.048	1.931	cpd:C00153	map00760 Nicotinate and nicotinamide metabolism;map01100 Metabolic pathways;map04977 Vitamin digestion and absorption	HMDB0001406	--	Organoheterocyclic compounds	Pyridines and derivatives	Pyridinecarboxylic acids and derivatives	--	--	--	Full match	Full match	Full match	4.57266e+08	4.48235e+08	3.06111e+08	3.95462e+08	4.94288e+08	3.58854e+08	2.95575e+08	2.19596e+08	1.45207e+08	1.89017e+08	2.59944e+08	1.80544e+08	0.524297	-0.931543	0.000627705	1	1.6757	down
Com_10989_pos	2,3-Dinor-TXB2	--	C18 H30 O6	342.203	11.556	--	--	HMDB0002904	LMFA03030003	Lipids and lipid-like molecules	Fatty Acyls	Eicosanoids	Fatty Acyls [FA]	Eicosanoids [FA03]	Thromboxanes [FA0303]	No results	No results	Full match	1.27138e+06	1.26348e+06	1.18739e+06	391553	1.48581e+06	661205	175123	228658	366607	338627	185006	295560	3.93865	1.9777	0.000628224	1	1.71264	up
Com_12322_pos	2,6-di[2-chloro-4-(dimethylamino)benzylidene]cyclohexan-1-one	--	C24 H26 Cl2 N2 O	428.145	9.949	--	--	--	--	--	--	--	--	--	--	Invalid mass	No results	No results	246354	356946	471802	232760	329804	311637	171754	159663	91009.8	165465	177556	175611	2.07139	1.0506	0.000658806	1	1.2808	up
Com_8408_pos	Wogonin	Wogonin; Norwogonin 8-methyl ether	C16 H12 O5	284.068	10.516	cpd:C10197	--	--	LMPK12111330	--	--	--	Polyketides [PK]	Flavonoids [PK12]	Flavones and Flavonols [PK1211]	Full match	No results	No results	1.99988e+06	1.98921e+06	2.2158e+06	3.07591e+06	1.85113e+06	2.62748e+06	790317	149464	641011	223609	534889	308604	5.19636	2.3775	0.000702529	1	1.8946	up
Com_1996_pos	Palmitoleic Acid	(9Z)-Hexadecenoic acid; Palmitoleic acid; cis-9-Hexadecenoic acid; (9Z)-Hexadec-9-enoate	C16 H30 O2	276.208	13.652	cpd:C08362	map00061 Fatty acid biosynthesis	HMDB0012328	LMFA01030056	Lipids and lipid-like molecules	Fatty Acyls	Fatty acids and conjugates	Fatty Acyls [FA]	Fatty Acids and Conjugates [FA01]	Unsaturated fatty acids [FA0103]	Invalid mass	No results	No results	2.52551e+07	3.74825e+07	4.78177e+07	2.97732e+07	3.35812e+07	4.21506e+07	1.42949e+07	1.66293e+07	1.34606e+07	2.18037e+07	2.19972e+07	2.36644e+07	1.93169	0.949866	0.000718833	1	1.27079	up
Com_3318_pos	tetranor-12(R)-HETE	--	C16 H26 O3	248.177	13.486	--	--	--	--	--	--	--	--	--	--	Invalid mass	No results	No results	1.98436e+07	1.46943e+07	1.06191e+07	6.62664e+06	1.4359e+07	9.02264e+06	3.45578e+06	4.2422e+06	5.31992e+06	3.95046e+06	4.01909e+06	4.10711e+06	2.99528	1.58269	0.000740263	1	1.90466	down
Com_3101_pos	Punicic Acid	Punicic acid; cis-9,trans-11,cis-13-Octadecatrienoic acid; Trichosanic acid	C18 H30 O2	278.224	14.188	cpd:C08364	--	HMDB0030963	LMFA01030146	Lipids and lipid-like molecules	Lineolic acids and derivatives	_	Fatty Acyls [FA]	Fatty Acids and Conjugates [FA01]	Unsaturated fatty acids [FA0103]	No results	No results	Full match	8.25244e+06	1.38596e+07	2.33592e+07	1.3273e+07	1.16005e+07	1.62727e+07	5.21719e+06	5.23107e+06	6.57312e+06	4.97433e+06	5.75772e+06	4.86011e+06	2.65588	1.40919	0.000748144	1	1.68605	up
Com_1874_pos	(±)15-HETE	--	C20 H32 O3	338.245	12.864	--	--	--	--	--	--	--	--	--	--	Invalid mass	No results	No results	2.2931e+07	3.47171e+07	5.30976e+07	1.69609e+07	2.68286e+07	3.53197e+07	8.17762e+06	1.1628e+07	1.12967e+07	1.09144e+07	1.16978e+07	9.50535e+06	3.00309	1.58645	0.000767131	1	1.65258	down
Com_172_pos	Gramine	Gramine; (1H-Indol-3-ylmethyl)dimethylamine; (1H-Indol-3-yl)-N,N-dimethylmethanamine	C11 H14 N2	129.058	10.451	cpd:C08304	--	--	--	--	--	--	--	--	--	Invalid mass	No results	No results	1136202340	1062926603	9.76947e+08	4.53172e+08	1160554002	7.69966e+08	2.4487e+08	3.79873e+08	4.03069e+08	432604511	3.50849e+08	4.03192e+08	2.51067	1.32807	0.00077803	1	1.59773	up
Com_2121_pos	6-Pentyl-2H-pyran-2-one	--	C10 H14 O2	166.099	9.211	--	--	HMDB0031085	--	Organoheterocyclic compounds	Pyrans	Pyranones and derivatives	--	--	--	Full match	No results	No results	2.30136e+07	3.28001e+07	4.39742e+07	2.78978e+07	2.6523e+07	3.88666e+07	1.55604e+07	1.87055e+07	2.02028e+07	1.41212e+07	1.86113e+07	1.6436e+07	1.86299	0.897622	0.00080479	1	1.4885	up
Com_144_pos	Methyl indole-3-acetate	--	C11 H11 N O2	189.079	10.451	--	--	HMDB0029738	--	Organoheterocyclic compounds	Indoles and derivatives	Indolyl carboxylic acids and derivatives	--	--	--	Full match	Full match	Full match	1282302124	1197956726	1100942180	4.95172e+08	1318875462	8.58324e+08	2.66897e+08	4.16602e+08	4.38364e+08	474351318	377760667	4.39041e+08	2.5916	1.37384	0.000818426	1	1.61009	up
Com_696_pos	4-Hydroxybenzaldehyde	4-Hydroxybenzaldehyde; p-Hydroxybenzaldehyde	C7 H6 O2	122.037	2.516	cpd:C00633	map01100 Metabolic pathways	HMDB0011718	--	Organic oxygen compounds	Organooxygen compounds	Carbonyl compounds	--	--	--	Full match	Full match	No results	1.14702e+08	9.61433e+07	1.74428e+08	1.22095e+08	1.96027e+08	9.45327e+07	5.0446e+07	5.79785e+07	8.5978e+07	4.41097e+07	6.09567e+07	6.85451e+07	2.1682	1.1165	0.000840465	1	1.48677	up
Com_5112_pos	D-(+)-Tryptophan	--	C11 H12 N2 O2	204.09	9.227	--	--	HMDB0013609	--	Organoheterocyclic compounds	Indoles and derivatives	Indolyl carboxylic acids and derivatives	--	--	--	Full match	Full match	Full match	8.45588e+06	7.6402e+06	6.66143e+06	4.53661e+06	8.6045e+06	6.04933e+06	3.49295e+06	4.31975e+06	4.48273e+06	2.49106e+06	4.01018e+06	3.58247e+06	1.87442	0.906446	0.000850031	1	1.60207	up
Com_5515_pos	LPC 15:1	--	C23 H46 N O7 P	479.301	14.164	--	--	--	LMGP01050125	--	--	--	Glycerophospholipids [GP]	Glycerophosphocholines [GP01]	Monoacylglycerophosphocholines [GP0105]	No results	Full match	No results	4.49405e+06	5.80344e+06	8.12207e+06	4.63996e+06	5.67824e+06	5.73768e+06	3.02495e+06	3.65675e+06	3.51092e+06	3.5029e+06	2.96964e+06	3.24101e+06	1.7319	0.792353	0.00088919	1	1.43878	up
Com_8642_pos	Tetrahydrocortisone	Tetrahydrocortisone; Urocortisone	C21 H32 O5	381.251	12.131	cpd:C05470	map00140 Steroid hormone biosynthesis	HMDB0000903	--	Lipids and lipid-like molecules	Steroids and steroid derivatives	Hydroxysteroids	--	--	--	Invalid mass	No results	No results	2.58432e+06	2.62692e+06	2.75633e+06	832465	2.94254e+06	1.88954e+06	368567	409084	1.10087e+06	971987	365514	603567	3.569	1.83552	0.000943552	0.944444	1.47306	up
Com_635_pos	Hyodeoxycholic acid	--	C24 H40 O4	392.292	13.991	--	--	HMDB0000811	LMST04010024	Lipids and lipid-like molecules	Steroids and steroid derivatives	Bile acids, alcohols and derivatives	Sterol Lipids [ST]	Bile acids and derivatives [ST04]	C24 bile acids, alcohols, and derivatives [ST0401]	No results	No results	Full match	2.3975e+08	1.65172e+08	1.20725e+08	2.57541e+07	191119138	7.24305e+07	3.02356e+06	1.14314e+07	2.64458e+07	1.85688e+07	8.28832e+06	2.56699e+07	8.7228	3.12479	0.0010183	0.972222	1.40497	up
Com_471_pos	L-Tyrosine	L-Tyrosine; (S)-3-(p-Hydroxyphenyl)alanine; (S)-2-Amino-3-(p-hydroxyphenyl)propionic acid; Tyrosine	C9 H11 N O3	181.074	1.371	cpd:C00082	map00130 Ubiquinone and other terpenoid-quinone biosynthesis;map00350 Tyrosine metabolism;map00360 Phenylalanine metabolism;map00400 Phenylalanine, tyrosine and tryptophan biosynthesis;map00730 Thiamine metabolism;map00970 Aminoacyl-tRNA biosynthesis;map01100 Metabolic pathways	HMDB0000158	--	Organic acids and derivatives	Carboxylic acids and derivatives	Amino acids, peptides, and analogues	--	--	--	Full match	Full match	Full match	3.92014e+08	2.09974e+08	3.06234e+08	2.46479e+08	3.22148e+08	2.86608e+08	151544714	1.4749e+08	2.23785e+08	9.98831e+07	1.44695e+08	1.70344e+08	1.88054	0.911145	0.00104865	0.972222	1.4735	up
Com_7887_pos	N-Arachidonoyl-L-serine	--	C23 H37 N O4	391.27	12.857	--	--	--	--	--	--	--	--	--	--	Invalid mass	Invalid mass	No results	150311	128444	115780	1.49008e+06	149973	120994	1.78872e+06	2.61301e+06	2.84813e+06	3.44423e+06	2.59124e+06	3.14938e+06	0.13116	-2.9306	0.0010596	1	1.66803	down
Com_1451_pos	Propionylcarnitine	--	C10 H19 N O4	217.131	1.353	--	--	HMDB0000824	LMFA07070105	Lipids and lipid-like molecules	Fatty Acyls	Fatty acid esters	Fatty Acyls [FA]	Fatty esters [FA07]	Fatty acyl carnitines [FA0707]	Full match	Full match	Full match	7.20735e+07	5.74301e+07	3.54307e+07	4.18258e+07	5.97585e+07	4.0809e+07	2.41815e+07	3.2207e+07	2.60416e+07	2.28546e+07	3.04561e+07	2.24093e+07	1.94326	0.958482	0.00110618	1	1.71517	up
Com_2067_pos	α-Linolenic acid	--	C18 H30 O2	278.224	13.35	--	--	--	--	--	--	--	--	--	--	Full match	No results	Full match	2.76963e+07	3.14181e+07	4.38105e+07	2.29185e+07	2.94139e+07	3.88899e+07	1.30162e+07	1.97193e+07	2.25616e+07	2.02911e+07	1.668e+07	1.74949e+07	1.76878	0.822756	0.00119272	1	1.04184	up
Com_7257_pos	19-Nortestosterone	--	C18 H26 O2	274.193	14.002	--	--	HMDB0002725	LMST02010044	Lipids and lipid-like molecules	Steroids and steroid derivatives	Estrane steroids	Sterol Lipids [ST]	Steroids [ST02]	C18 steroids (estrogens) and derivatives [ST0201]	No results	No results	Full match	4.58671e+06	2.89814e+06	2.10173e+06	1.43045e+06	2.91783e+06	1.727e+06	1.04885e+06	561081	1.20164e+06	988154	932388	908427	2.77666	1.47335	0.00119617	1	1.594	up
Com_3892_pos	L-Acetylcarnitine	--	C9 H17 N O4	203.115	9.551	--	--	HMDB0000201	LMFA07070050	Lipids and lipid-like molecules	Fatty Acyls	Fatty acid esters	Fatty Acyls [FA]	Fatty esters [FA07]	Fatty acyl carnitines [FA0707]	No results	No results	Full match	1.1313e+07	1.02318e+07	8.72885e+06	1.11762e+07	1.14926e+07	1.08705e+07	4.67999e+06	4.85725e+06	8.11392e+06	3.81046e+06	3.70884e+06	6.46887e+06	2.01689	1.01213	0.00129374	1	1.51598	up
Com_1344_pos	ACar 14:1	--	C21 H40 N O4	369.287	13.19	--	--	--	--	--	--	--	--	--	--	No results	Invalid mass	No results	2.43833e+07	2.54606e+07	3.0394e+07	3.72312e+07	2.22482e+07	3.4469e+07	3.48192e+07	5.29734e+07	4.97109e+07	4.6584e+07	4.56895e+07	4.64563e+07	0.630577	-0.665256	0.00130018	0.972222	1.445	down
Com_6789_pos	5-amino-1-(4-chlorobenzyl)-1H-1,2,3-triazole-4-carboxamide	--	C10 H10 Cl N5 O	251.053	10.452	--	--	--	--	--	--	--	--	--	--	Invalid mass	No results	No results	4.86299e+06	4.52794e+06	3.98865e+06	1.59142e+06	5.00136e+06	3.47342e+06	943359	1.37539e+06	1.32238e+06	1.75292e+06	1.51024e+06	1.4126e+06	2.81906	1.49521	0.00133519	0.972222	1.62504	up
Com_10652_pos	ethyl 4-hydroxy-2-[(4-methoxyphenoxy)methyl]pyrimidine-5-carboxylate	--	C15 H16 N2 O5	304.103	9.572	--	--	--	--	--	--	--	--	--	--	Invalid mass	No results	No results	439311	1.2611e+06	1.82054e+06	487214	848263	1.36023e+06	360353	262910	291252	127718	265087	237755	4.02353	2.00846	0.00136419	1	1.6827	up
Com_2731_pos	L-Kynurenine	L-Kynurenine; 3-Anthraniloyl-L-alanine	C10 H12 N2 O3	208.084	5.236	cpd:C00328	map00380 Tryptophan metabolism;map01100 Metabolic pathways;map05143 African trypanosomiasis	HMDB0000684	--	Organic oxygen compounds	Organooxygen compounds	Carbonyl compounds	--	--	--	Full match	No results	Full match	2.14978e+07	2.39275e+07	2.88966e+07	1.81427e+07	2.35449e+07	1.81187e+07	1.08326e+07	9.40286e+06	1.22754e+07	5.87138e+06	1.63418e+07	9.32536e+06	2.09414	1.06636	0.00137187	1	1.15188	up
Com_8085_pos	5alpha-Pregnane-3,20-dione	5alpha-Pregnane-3,20-dione; 5alpha-Dihydroprogesterone	C21 H32 O2	316.24	12.913	cpd:C03681	map00140 Steroid hormone biosynthesis	HMDB0003759	LMST02030170	Lipids and lipid-like molecules	Steroids and steroid derivatives	Pregnane steroids	Sterol Lipids [ST]	Steroids [ST02]	C21 steroids (gluco/mineralocorticoids, progestogins) and derivatives [ST0203]	No results	No results	Full match	3.67585e+06	2.9316e+06	2.23368e+06	959077	3.12206e+06	1.92408e+06	515654	624691	1.0768e+06	923103	691235	928771	3.11882	1.641	0.00142034	0.972222	1.54319	up
Com_1875_pos	2-Phenylacetamide	2-Phenylacetamide; alpha-Phenylacetamide	C8 H9 N O	118.042	1.434	cpd:C02505	map00360 Phenylalanine metabolism	HMDB0010715	--	Benzenoids	Benzene and substituted derivatives	Phenylacetamides	--	--	--	No results	Invalid mass	No results	3.61981e+07	3.86458e+07	5.06106e+07	3.64571e+07	4.76451e+07	4.03136e+07	2.64351e+07	2.64946e+07	3.05945e+07	1.9109e+07	3.1659e+07	3.01358e+07	1.51963	0.603724	0.0014913	1	1.30294	up
Com_6412_pos	N-Stearoyl taurine	--	C20 H41 N O4 S	408.303	12.887	--	--	--	LMFA08020078	--	--	--	Fatty Acyls [FA]	Fatty amides [FA08]	N-acyl amines [FA0802]	Invalid mass	No results	No results	3.1787e+06	4.59491e+06	6.27099e+06	2.05147e+06	3.6885e+06	3.82881e+06	707628	1.06095e+06	2.29493e+06	1.933e+06	1.01617e+06	1.57579e+06	2.74943	1.45913	0.00150589	0.972222	1.54678	up	高
Com_8_pos	Taurocholic acid	Taurocholate; Taurocholic acid; Cholyltaurine	C26 H45 N O7 S	515.291	12.585	cpd:C05122	map00120 Primary bile acid biosynthesis;map00430 Taurine and hypotaurine metabolism;map01100 Metabolic pathways;map04976 Bile secretion;map04979 Cholesterol metabolism	HMDB0000036	LMST05040001	Lipids and lipid-like molecules	Steroids and steroid derivatives	Bile acids, alcohols and derivatives	Sterol Lipids [ST]	Steroid conjugates [ST05]	Taurine conjugates [ST0504]	Full match	Full match	Full match	11867292168	7479577482	3.82852e+08	1.67406e+08	9638761564	2.69461e+08	8.40661e+06	1.75998e+07	8.44737e+07	4.86589e+06	1.57483e+07	3.68181e+07	177.505	7.47172	0.00151742	1	1.71034	up
Com_1263_pos	ACar 16:1	--	C23 H44 N O4	397.318	13.6	--	--	--	--	--	--	--	--	--	--	No results	Invalid mass	No results	3.07287e+07	2.97641e+07	3.4555e+07	4.87338e+07	3.02221e+07	4.16401e+07	4.03255e+07	6.75985e+07	6.09033e+07	7.66e+07	5.99056e+07	5.64898e+07	0.595993	-0.746633	0.00164783	0.944444	1.6665	down
Com_4850_pos	Biliverdin	Biliverdin; Biliverdin IX alpha	C33 H34 N4 O6	582.247	12.082	cpd:C00500	map00860 Porphyrin and chlorophyll metabolism;map01100 Metabolic pathways	HMDB0001008	--	Organoheterocyclic compounds	Tetrapyrroles and derivatives	Bilirubins	--	--	--	No results	Full match	No results	9.55661e+06	9.87524e+06	9.11531e+06	4.2817e+06	9.16786e+06	7.51324e+06	4.06921e+06	4.06816e+06	4.68869e+06	2.98974e+06	4.18399e+06	3.80578e+06	2.07976	1.05642	0.00165119	0.972222	1.79748	up
Com_4448_pos	Galangin	Galangin; 3,5,7-Trihydroxyflavone	C15 H10 O5	270.053	10.936	cpd:C10044	--	HMDB0029521	LMPK12111653	Phenylpropanoids and polyketides	Flavonoids	Flavones	Polyketides [PK]	Flavonoids [PK12]	Flavones and Flavonols [PK1211]	Full match	No results	No results	1.19729e+07	1.10239e+07	1.08022e+07	1.06049e+07	1.07951e+07	1.15001e+07	2.18474e+06	544928	4.07948e+06	478578	1.7136e+06	1.97176e+06	6.07842	2.6037	0.0018113	1	1.86423	up
Com_1241_pos	Indole-3-acetic acid	Indole-3-acetate; Indole-3-acetic acid; (Indol-3-yl)acetate; Indoleacetate; Indoleacetic acid; IAA	C10 H9 N O2	175.063	9.688	cpd:C00954	map00380 Tryptophan metabolism;map01100 Metabolic pathways	HMDB0000197	--	Organoheterocyclic compounds	Indoles and derivatives	Indolyl carboxylic acids and derivatives	--	--	--	Full match	Full match	Full match	9.01818e+07	6.79313e+07	4.18731e+07	2.6078e+07	8.01273e+07	3.59896e+07	1.15477e+07	1.31374e+07	2.81122e+07	2.22423e+07	1.33018e+07	2.35757e+07	3.05745	1.61233	0.0019377	0.972222	1.37085	up
Com_961_pos	gamma-Glutamyltyrosine	--	C14 H18 N2 O6	310.116	6.014	--	--	HMDB0011741	--	Organic acids and derivatives	Carboxylic acids and derivatives	Amino acids, peptides, and analogues	--	--	--	No results	Full match	No results	7.15809e+07	1.02268e+08	1.36362e+08	8.12488e+07	9.01782e+07	1.14078e+08	5.21624e+07	5.39659e+07	5.81855e+07	5.72718e+07	5.82541e+07	5.97796e+07	1.75407	0.810707	0.00198858	1	1.82155	up
Com_1540_pos	9-Oxo-ODE	--	C18 H30 O3	294.219	13.92	--	--	HMDB0004669	--	Lipids and lipid-like molecules	Fatty Acyls	Lineolic acids and derivatives	--	--	--	Full match	No results	Full match	2.91985e+07	3.72558e+07	6.93578e+07	3.29862e+07	3.19671e+07	5.43968e+07	1.78949e+07	2.29388e+07	1.46795e+07	2.14851e+07	2.02861e+07	2.02606e+07	2.17076	1.1182	0.00204267	1	1.20583	up
Com_4088_pos	N-[4-(Aminosulfonyl)phenyl]-5-(morpholinosulfonyl)-2-furamide	--	C15 H17 N3 O7 S2	432.077	10.453	--	--	--	--	--	--	--	--	--	--	Invalid mass	No results	No results	6.50204e+06	7.82467e+06	6.44888e+06	1.66603e+06	1.28892e+07	6.17336e+06	669868	1.62423e+06	1.83781e+06	2.29052e+06	1.11005e+06	1.59538e+06	4.54697	2.18491	0.00212993	0.944444	1.3148	up
Com_7581_pos	11-Ketoetiocholanolone	11-Ketoetiocholanolone; 3alpha-Hydroxy-5beta-androstane-11,17-dione	C19 H28 O3	304.203	13.36	cpd:C14552	--	HMDB0006031	LMST02020087	Lipids and lipid-like molecules	Steroids and steroid derivatives	Androstane steroids	Sterol Lipids [ST]	Steroids [ST02]	C19 steroids (androgens) and derivatives [ST0202]	No results	No results	Full match	4.20325e+06	1.95113e+06	3.81091e+06	1.41023e+06	2.37844e+06	1.64276e+06	805942	937242	1.33602e+06	700155	1.08225e+06	823971	2.70803	1.43724	0.00218278	1	1.55729	up
Com_3154_pos	(+)-Aphidicolin	--	C20 H34 O4	320.235	12.877	--	--	--	--	--	--	--	--	--	--	Invalid mass	No results	No match	9.25905e+06	1.48068e+07	2.16045e+07	1.02543e+07	1.03633e+07	1.42061e+07	6.96631e+06	5.79051e+06	2.77337e+06	6.75933e+06	8.18307e+06	4.61216e+06	2.29427	1.19804	0.0023116	1	1.29291	up
Com_8712_pos	11β-Prostaglandin F2α	--	C20 H34 O5	376.224	12.276	--	--	--	--	--	--	--	--	--	--	Invalid mass	No results	No results	3.06939e+06	2.13257e+06	2.72315e+06	1.36775e+06	2.15688e+06	2.88703e+06	884246	660298	1.50337e+06	1.31027e+06	819339	1.55524e+06	2.1294	1.09045	0.0023816	0.944444	1.36009	up
Com_1247_pos	Quinoline	Quinoline; Benzo[b]pyridine	C9 H7 N	129.058	9.687	cpd:C06413	--	HMDB0033731	--	Organoheterocyclic compounds	Quinolines and derivatives	_	--	--	--	Full match	No results	No results	8.94616e+07	6.78144e+07	4.35998e+07	2.61618e+07	8.41932e+07	3.82932e+07	1.25216e+07	1.41696e+07	2.89977e+07	2.22639e+07	1.6631e+07	2.6726e+07	2.88125	1.5267	0.00247212	0.944444	1.35361	up
Com_11763_pos	Tetrahydroaldosterone	--	C21 H32 O5	364.225	10.216	--	--	--	--	--	--	--	--	--	--	No results	No results	Full match	1.1799e+06	762390	503343	205313	942323	332582	113322	102632	233310	152085	102068	225611	4.22576	2.07921	0.00272778	0.944444	1.43276	up
Com_2484_pos	13-Hpotre(R)	--	C18 H30 O4	310.214	11.965	--	--	--	--	--	--	--	--	--	--	No results	No results	Full match	3.22813e+07	1.80817e+07	8.83858e+06	2.29401e+06	1.99317e+07	5.16611e+06	799997	1.0328e+06	2.06893e+06	1.43367e+06	1.59103e+06	1.59919e+06	10.1569	3.34438	0.00278273	1	1.77391	up
Com_9702_pos	Pyridoxine O-Glucoside	--	C14 H21 N O8	331.127	6.549	--	--	--	--	--	--	--	--	--	--	No results	No results	Full match	1.33477e+06	2.05874e+06	2.42073e+06	1.88905e+06	1.19956e+06	2.4072e+06	788953	920960	1.13664e+06	349641	1.02528e+06	718544	2.28947	1.19502	0.00287931	1	1.24884	up
Com_2197_pos	2,6-Di-tert-butyl-1,4-benzoquinone	--	C14 H20 O2	220.146	12.819	--	--	HMDB0013817	--	Lipids and lipid-like molecules	Prenol lipids	Monoterpenoids	--	--	--	Full match	No results	No results	3.98691e+07	3.12354e+07	2.27101e+07	1.21131e+07	3.08033e+07	1.45072e+07	8.0592e+06	8.27431e+06	9.8828e+06	7.61239e+06	8.49399e+06	8.95212e+06	2.94956	1.5605	0.00303887	1	1.73626	up
Com_6294_pos	4-Pregnen-17alpha,20alpha-Diol-3-One	--	C21 H32 O3	332.235	12.773	--	--	--	--	--	--	--	--	--	--	No results	No results	Full match	2.6296e+06	5.92177e+06	6.4931e+06	2.28171e+06	3.36335e+06	4.02142e+06	2.00066e+06	1.76804e+06	1.85792e+06	1.34217e+06	1.89328e+06	1.22455e+06	2.44987	1.29271	0.00308324	1	1.70267	up
Com_6913_pos	16,16-Dimethyl prostaglandin A2	--	C22 H34 O4	344.234	12.106	--	--	--	--	--	--	--	--	--	--	Invalid mass	No results	No match	1.35623e+06	3.98774e+06	5.36019e+06	1.17022e+06	1.98898e+06	3.3933e+06	546110	370993	1.08817e+06	1.06601e+06	498720	1.13573e+06	3.66715	1.87466	0.00339203	1	1.32965	up
Com_3739_pos	1,2-dihydroxyheptadec-16-yn-4-yl acetate	--	C19 H34 O4	348.23	11.577	--	--	--	LMFA05000645	--	--	--	Fatty Acyls [FA]	Fatty alcohols [FA05]	_	Invalid mass	No results	No results	6.80123e+06	1.21519e+07	1.67598e+07	8.4237e+06	9.46489e+06	1.27829e+07	6.61056e+06	3.51552e+06	3.25275e+06	7.9109e+06	5.48445e+06	5.05683e+06	2.08553	1.06041	0.00343943	0.972222	1.30271	up
Com_2270_pos	Cortisol	Cortisol; Hydrocortisone; 11beta,17alpha,21-Trihydroxy-4-pregnene-3,20-dione; Kendall's compound F; Reichstein's substance M	C21 H30 O5	362.209	11.638	cpd:C00735	map00140 Steroid hormone biosynthesis;map01100 Metabolic pathways;map04080 Neuroactive ligand-receptor interaction;map04927 Cortisol synthesis and secretion;map04934 Cushing's syndrome;map04960 Aldosterone-regulated sodium reabsorption;map04976 Bile secretion;map05200 Pathways in cancer;map05215 Prostate cancer	HMDB0000063	LMST02030001	Lipids and lipid-like molecules	Steroids and steroid derivatives	Hydroxysteroids	Sterol Lipids [ST]	Steroids [ST02]	C21 steroids (gluco/mineralocorticoids, progestogins) and derivatives [ST0203]	Full match	Full match	Full match	3.80166e+07	2.35038e+07	7.5838e+06	3.17565e+06	2.9009e+07	5.03212e+06	1.29953e+06	821872	3.58249e+06	1.94702e+06	1.12288e+06	2.65122e+06	9.30598	3.21816	0.00354311	0.972222	1.55508	up
Com_5807_pos	N-(4-fluorophenyl)-N'-(2-piperidinophenyl)urea	--	C18 H20 F N3 O	351.111	12.12	--	--	--	--	--	--	--	--	--	--	Invalid mass	No results	No results	4.6795e+06	5.80788e+06	6.28892e+06	6.57951e+06	4.35739e+06	4.84653e+06	3.37384e+06	4.08548e+06	3.32371e+06	1.73213e+06	3.57163e+06	2.32225e+06	1.76868	0.822674	0.00421967	1	1.33462	up
Com_1780_pos	(R)-Equol	--	C15 H14 O3	242.094	9.559	--	--	--	--	--	--	--	--	--	--	Full match	Full match	Full match	5.43394e+07	3.83623e+07	2.54075e+07	3.28617e+07	5.01386e+07	2.95459e+07	2.42525e+07	2.47669e+07	1.92569e+07	1.40063e+07	2.66959e+07	1.70353e+07	1.8304	0.872158	0.00422895	0.972222	1.47996	up
Com_6118_pos	11-Deoxy prostaglandin F1β	--	C20 H36 O4	362.245	12.107	--	--	--	--	--	--	--	--	--	--	Invalid mass	No results	No results	1.44633e+06	4.99631e+06	6.85343e+06	1.6303e+06	2.26952e+06	4.71529e+06	530348	374609	1.37414e+06	1.32665e+06	484012	1.49941e+06	3.9203	1.97096	0.00435639	0.972222	1.33542	up
Com_7229_pos	19-Norethisterone	Norethindrone; 19-Norethisterone; 19-Nor-17alpha-ethynyl-17beta-hydroxy-4-androsten-3-one	C20 H26 O2	298.193	11.86	cpd:C05028	--	HMDB0014855	--	Lipids and lipid-like molecules	Steroids and steroid derivatives	Estrane steroids	--	--	--	No results	No results	Full match	3.49261e+06	3.24774e+06	2.71759e+06	1.46436e+06	3.00438e+06	2.29808e+06	1.33275e+06	1.32092e+06	1.49657e+06	1.74398e+06	1.35076e+06	1.36414e+06	1.8846	0.914256	0.00437821	0.944444	1.43416	up
Com_1169_pos	Acetylcholine	Acetylcholine; O-Acetylcholine	C7 H15 N O2	145.11	1.328	cpd:C01996	map00564 Glycerophospholipid metabolism;map04024 cAMP signaling pathway;map04080 Neuroactive ligand-receptor interaction;map04721 Synaptic vesicle cycle;map04725 Cholinergic synapse;map04742 Taste transduction;map04810 Regulation of actin cytoskeleton;map04911 Insulin secretion;map04970 Salivary secretion;map04971 Gastric acid secretion;map04972 Pancreatic secretion;map04976 Bile secretion;map050…	--	--	--	--	--	--	--	--	No results	No results	Full match	9.08545e+07	9.15619e+07	6.56679e+07	51585300	9.2721e+07	6.42655e+07	5.0143e+07	5.36355e+07	4.3254e+07	4.05958e+07	5.40558e+07	4.31831e+07	1.60305	0.680819	0.00443476	0.944444	1.4618	up
Com_6435_pos	Tetrahydro-11-deoxycortisol	3alpha,17alpha,21-Trihydroxy-5beta-pregnan-20-one; Tetrahydro-11-deoxycortisol	C21 H34 O4	350.245	11.196	cpd:C14594	--	HMDB0005972	--	Lipids and lipid-like molecules	Steroids and steroid derivatives	Hydroxysteroids	--	--	--	No results	No results	Full match	3.13843e+06	2.31113e+06	1.67374e+06	5.46641e+06	2.44056e+06	3.7779e+06	1.26733e+06	1.66883e+06	1.17166e+06	1.2497e+06	1.75951e+06	1.12634e+06	2.28161	1.19005	0.00447862	0.972222	1.49266	up
Com_118_pos	D-Phenylalanine	D-Phenylalanine; D-alpha-Amino-beta-phenylpropionic acid	C9 H11 N O2	165.079	5.151	cpd:C02265	map00360 Phenylalanine metabolism;map04742 Taste transduction	--	--	--	--	--	--	--	--	No results	No results	Full match	1750659461	1418336287	1065577287	1155885049	1747523211	1204095582	9.56182e+08	8.82399e+08	1083910909	7.55715e+08	9.74399e+08	9.07311e+08	1.5004	0.585343	0.00459652	0.972222	1.50271	up
Com_667_pos	Adenosine	Adenosine	C10 H13 N5 O4	267.096	3.096	cpd:C00212	map00230 Purine metabolism;map01100 Metabolic pathways;map04022 cGMP-PKG signaling pathway;map04024 cAMP signaling pathway;map04071 Sphingolipid signaling pathway;map04080 Neuroactive ligand-receptor interaction;map04270 Vascular smooth muscle contraction;map04923 Regulation of lipolysis in adipocytes;map04924 Renin secretion;map05012 Parkinson's disease;map05032 Morphine addiction;map05034 Alcoh…	HMDB0000050	--	Nucleosides, nucleotides, and analogues	Purine nucleosides	_	--	--	--	Full match	Full match	Full match	1.68127e+06	1.80918e+06	2.33967e+06	1.34995e+06	1.82518e+06	1.58377e+06	3.57819e+07	2.53497e+06	217385675	9.44398e+07	2.1808e+07	1.55732e+08	0.020067	-5.63903	0.00471483	1	1.68191	down
Com_11929_pos	23-Nordeoxycholic acid	--	C23 H38 O4	378.277	11.58	--	--	--	--	--	--	--	--	--	--	No results	No results	Full match	495329	698394	1.13992e+06	176145	501432	829424	148845	172920	129199	186693	154513	207340	3.84252	1.94205	0.00484471	0.944444	1.50153	up
Com_511_pos	2-(14,15-Epoxyeicosatrienoyl) glycerol	--	C23 H38 O5	416.253	12.096	--	--	HMDB0013651	--	Lipids and lipid-like molecules	Glycerolipids	Monoradylglycerols	--	--	--	Invalid mass	No results	No results	4.76794e+07	1.98775e+08	3.67554e+08	6.6913e+07	9.71705e+07	2.05298e+08	5.59786e+06	1.9758e+07	5.77967e+07	3.80719e+07	1.27506e+07	4.51874e+07	5.48882	2.4565	0.00490425	0.972222	1.53761	up
Com_1005_pos	Indole-3-acrylic acid	--	C11 H9 N O2	187.063	9.197	--	--	--	--	--	--	--	--	--	--	Full match	No results	Full match	1.10092e+08	1.11285e+08	1.06778e+08	3.49868e+07	1.14692e+08	7.7816e+07	1.95353e+07	4.9048e+07	4.32525e+07	3.37998e+07	4.55219e+07	3.70936e+07	2.43438	1.28356	0.00501983	0.888889	1.43786	up
Com_1649_pos	Cafestol	Cafestol	C20 H28 O3	316.203	12.073	cpd:C09066	--	HMDB0035710	--	Organoheterocyclic compounds	Naphthofurans	_	--	--	--	Full match	No results	Full match	2.48769e+07	3.80954e+07	6.32714e+07	2.14577e+07	4.58835e+07	3.54037e+07	1.50073e+07	1.65453e+07	2.11939e+07	1.81201e+07	1.6577e+07	1.61547e+07	2.21035	1.14428	0.00502501	1	1.53272	up
Com_322_pos	PC (18:0e/2:0)	--	C28 H58 N O7 P	551.394	15.709	--	--	--	--	--	--	--	--	--	--	No results	Full match	No results	9.5738e+07	1.4738e+08	8.30185e+07	2.90877e+07	7.36222e+07	1.99249e+08	4.32525e+08	3.30895e+08	2.66368e+08	3.51778e+08	3.34251e+08	1.46167e+08	0.337326	-1.56778	0.00503237	0.944444	1.25603	down
Com_380_pos	Taurodeoxycholic Acid	Taurodeoxycholate; Taurodeoxycholic acid	C26 H45 N O6 S	481.285	13.558	cpd:C05463	--	HMDB0000896	LMST05040013	Lipids and lipid-like molecules	Steroids and steroid derivatives	Bile acids, alcohols and derivatives	Sterol Lipids [ST]	Steroid conjugates [ST05]	Taurine conjugates [ST0504]	Invalid mass	No results	No results	5.27129e+08	2.84305e+08	1.78712e+07	1.19047e+07	3.98643e+08	1.86622e+07	1.26497e+06	1.62316e+06	1.21436e+07	2.80642e+06	2.77984e+06	6.46634e+06	46.4665	5.53812	0.00522288	0.972222	1.45132	up
Com_8059_pos	delta8-THC-d9	--	C21 H21 [2]H9 O2	323.282	14.68	--	--	--	--	--	--	--	--	--	--	Full match	No results	No results	2.86593e+06	2.58781e+06	3.00376e+06	1.98653e+06	3.48421e+06	2.72479e+06	1.98157e+06	1.78119e+06	1.41553e+06	1.01285e+06	2.29811e+06	1.64904e+06	1.64259	0.71597	0.00545147	0.972222	1.41873	up
Com_5547_pos	19(R)-hydroxy Prostaglandin E1	--	C20 H34 O6	352.223	12.86	--	--	--	--	--	--	--	--	--	--	Invalid mass	Invalid mass	No results	7.48237e+06	7.66198e+06	4.04059e+06	2.2162e+06	6.73541e+06	3.38468e+06	1.81048e+06	1.56839e+06	2.69547e+06	2.28873e+06	1.69024e+06	1.78076e+06	2.6636	1.41338	0.00556374	0.944444	1.70719	up
Com_1488_pos	LPE 22:5	--	C27 H46 N O7 P	527.3	14.622	--	--	--	LMGP02050070	--	--	--	Glycerophospholipids [GP]	Glycerophosphoethanolamines [GP02]	Monoacylglycerophosphoethanolamines [GP0205]	No results	Full match	No results	1.5225e+07	1.55354e+07	1.77968e+07	3.78044e+07	1.43562e+07	2.01809e+07	3.1948e+07	5.2942e+07	2.74148e+07	3.00537e+07	4.53711e+07	3.51812e+07	0.542363	-0.882669	0.00587135	0.888889	1.21953	down
Com_7779_pos	2-hydroxy-6-[(8Z,11Z)-pentadeca-8,11,14-trien-1-yl]benzoic acid	--	C22 H30 O3	324.208	13.168	--	--	--	--	--	--	--	--	--	--	Invalid mass	No results	No results	1.34513e+06	3.10894e+06	4.17276e+06	2.00922e+06	2.23272e+06	2.86618e+06	1.31238e+06	1.24331e+06	951175	1.61744e+06	1.40382e+06	1.03075e+06	2.08165	1.05773	0.00587147	0.944444	1.39769	up
Com_1178_pos	13,14-dihydro-15-keto-PGD2	--	C20 H32 O5	352.224	12.077	--	--	HMDB0060042	LMFA03010022	Lipids and lipid-like molecules	Fatty Acyls	Eicosanoids	Fatty Acyls [FA]	Eicosanoids [FA03]	Prostaglandins [FA0301]	No results	No results	Full match	5.31426e+07	8.06375e+07	1.0215e+08	3.70063e+07	4.82784e+07	5.81393e+07	2.8981e+07	2.74287e+07	3.65296e+07	3.47018e+07	2.74777e+07	3.61391e+07	1.98347	0.988027	0.0063113	1	1.45258	up
Com_9174_pos	Dehydrocholic acid	Dehydrocholic acid; 3,7,12-Triketo-5beta-cholanoic acid	C24 H34 O5	402.238	12.109	cpd:C13154	--	--	LMST04010106	--	--	--	Sterol Lipids [ST]	Bile acids and derivatives [ST04]	C24 bile acids, alcohols, and derivatives [ST0401]	Invalid mass	No results	No results	504349	2.01286e+06	2.83988e+06	844058	752690	1.93682e+06	266673	188855	646553	555565	236948	535140	3.65911	1.87149	0.00645018	0.916667	1.28835	up
Com_6151_pos	Vitamin A	Retinol; all-trans-Retinol; Vitamin A; Vitamin A1	C20 H30 O	286.229	14.18	cpd:C00473	map00830 Retinol metabolism;map01100 Metabolic pathways;map04977 Vitamin digestion and absorption	HMDB0000305	LMPR01090001	Lipids and lipid-like molecules	Prenol lipids	Retinoids	Prenol Lipids [PR]	Isoprenoids [PR01]	Retinoids [PR0109]	No results	No results	Full match	1.93929e+06	4.00628e+06	5.61374e+06	3.87516e+06	3.60862e+06	4.26112e+06	2.29454e+06	1.86747e+06	2.0791e+06	1.86468e+06	2.12373e+06	1.92849e+06	1.91678	0.938684	0.00741574	0.916667	1.31984	up
Com_2707_pos	Daidzein	Daidzein	C15 H10 O4	254.058	10.41	cpd:C10208	--	HMDB0003312	LMPK12050038	Phenylpropanoids and polyketides	Isoflavonoids	Isoflav-2-enes	Polyketides [PK]	Flavonoids [PK12]	Isoflavonoids [PK1205]	Full match	Full match	No results	2.18237e+07	2.14746e+07	2.22674e+07	2.4444e+07	2.0278e+07	2.38087e+07	7.91604e+06	960720	1.19317e+07	1.40716e+06	4.47226e+06	6.11552e+06	4.08788	2.03135	0.00773348	1	1.67061	up
Com_4406_pos	C-8 Ceramide-1-phosphate	--	C26 H52 N O6 P	505.353	14.868	--	--	--	--	--	--	--	--	--	--	Full match	No results	No results	4.39024e+06	5.51783e+06	1.2731e+07	1.06556e+07	2.51476e+06	9.09569e+06	2.7897e+06	1.43934e+06	1.14843e+06	4.46529e+06	1.92448e+06	2.89688e+06	3.06225	1.61459	0.00794561	0.888889	1.46991	up
Com_5305_pos	Chenodeoxycholic acid-3-beta-D-glucuronide	--	C30 H48 O10	568.324	13.407	--	--	--	--	--	--	--	--	--	--	No results	No results	Full match	1.52307e+06	4.51768e+06	8.89649e+06	653190	2.74347e+06	4.5705e+06	566309	491825	678498	552929	515377	733792	6.47249	2.69432	0.0082863	0.944444	1.52255	up
Com_4596_pos	β-Cortolone	--	C21 H34 O5	348.23	11.858	--	--	--	--	--	--	--	--	--	--	Invalid mass	No results	No results	1.11554e+07	1.03523e+07	8.99892e+06	4.79673e+06	9.87944e+06	5.83891e+06	3.56117e+06	3.52124e+06	5.23319e+06	6.29449e+06	3.89539e+06	5.43072e+06	1.82637	0.868976	0.00829472	0.888889	1.12145	up
Com_9099_pos	10-Nitrolinoleate	--	C18 H31 N O4	331.236	11.378	--	--	HMDB0005049	--	Lipids and lipid-like molecules	Fatty Acyls	Lineolic acids and derivatives	--	--	--	Invalid mass	No results	No results	749421	1.10595e+06	1.05711e+06	1.33084e+06	837638	1.12326e+06	1.10933e+06	1.36186e+06	1.78061e+06	2.08419e+06	1.37239e+06	1.71771e+06	0.658197	-0.603409	0.00847256	0.944444	1.17362	down
Com_7030_pos	Estradiol	Estradiol-17beta; Estradiol; beta-Estradiol	C18 H24 O2	272.177	12.134	cpd:C00951	map00140 Steroid hormone biosynthesis;map01100 Metabolic pathways;map01522 Endocrine resistance;map04913 Ovarian steroidogenesis;map04915 Estrogen signaling pathway;map04917 Prolactin signaling pathway;map04961 Endocrine and other factor-regulated calcium reabsorption;map05200 Pathways in cancer;map05215 Prostate cancer;map05224 Breast cancer	HMDB0000151	--	Lipids and lipid-like molecules	Steroids and steroid derivatives	Estrane steroids	--	--	--	No results	No results	Full match	1.24382e+06	3.18538e+06	5.15607e+06	1.86823e+06	1.14015e+06	2.98862e+06	769968	988353	1.03719e+06	710253	737429	885222	3.03842	1.60332	0.00849594	1	1.60141	up
Com_2254_pos	PC (17:0/18:4)	--	C43 H78 N O8 P	767.546	16.221	--	--	--	--	--	--	--	--	--	--	No results	Full match	No results	8.16353e+06	5.96002e+06	9.18703e+06	5.9272e+06	9.55726e+06	9.52155e+06	1.36201e+07	9.72588e+06	1.65078e+07	1.36251e+07	9.58864e+06	1.05559e+07	0.656267	-0.607646	0.00863846	1	1.09488	down
Com_1762_pos	Isoquinoline	Isoquinoline; 2-Benzazine; Benzo[c]pyridine	C9 H7 N	129.058	9.193	cpd:C06323	--	HMDB0034244	--	Organoheterocyclic compounds	Isoquinolines and derivatives	_	--	--	--	Full match	No results	No results	4.99689e+07	5.00131e+07	4.75929e+07	2.17457e+07	5.17214e+07	3.9727e+07	2.11605e+07	3.23617e+07	2.38197e+07	1.9421e+07	3.00399e+07	2.10858e+07	1.76328	0.818261	0.00869478	0.916667	1.34385	up
Com_9568_pos	Morphine	Morphine	C17 H19 N O3	285.136	12.938	cpd:C01516	map00982 Drug metabolism - cytochrome P450;map01100 Metabolic pathways;map04080 Neuroactive ligand-receptor interaction	HMDB0014440	--	Alkaloids and derivatives	Morphinans	_	--	--	--	Full match	No results	No results	1.68035e+06	1.06023e+06	1.04856e+06	2.22247e+06	1.34142e+06	1.28581e+06	776109	889941	1.16165e+06	791574	793451	889183	1.62938	0.704327	0.00919862	0.944444	1.27966	up
Com_1038_pos	Hippuric acid	Hippurate; Hippuric acid; N-Benzoylglycine; Benzoylaminoacetic acid	C9 H9 N O3	179.058	7.514	cpd:C01586	map00360 Phenylalanine metabolism	HMDB0000714	--	Benzenoids	Benzene and substituted derivatives	Benzoic acids and derivatives	--	--	--	Full match	No results	Full match	8.36917e+07	1.1094e+08	1.05574e+08	5.75354e+07	1.08545e+08	9.65365e+07	7.53856e+07	4.88943e+07	4.56053e+07	5.13822e+07	8.23718e+07	5.36518e+07	1.57525	0.655581	0.0095611	0.944444	1.29558	up
Com_5187_pos	12-oxo Phytodienoic Acid	--	C18 H28 O3	292.202	13.567	--	--	--	--	--	--	--	--	--	--	Full match	No results	No results	4.08427e+06	6.03988e+06	8.08374e+06	4.78629e+06	6.29429e+06	6.50947e+06	1.71008e+06	3.64181e+06	2.32865e+06	2.8821e+06	1.99915e+06	457036	2.74971	1.45928	0.0101736	1	1.19549	up
Com_6074_pos	11beta-Prostaglandin F2alpha	--	C20 H34 O5	354.24	12.125	--	--	HMDB0010199	--	Lipids and lipid-like molecules	Fatty Acyls	Eicosanoids	--	--	--	No results	No results	Full match	2.74299e+06	6.48064e+06	4.61493e+06	2.49589e+06	2.62191e+06	2.71675e+06	241378	916601	2.57573e+06	1.15675e+06	676728	1.63472e+06	3.00936	1.58946	0.0105147	0.972222	1.44641	up
Com_10882_pos	Ergocalciferol	Vitamin D2; Ergocalciferol	C28 H44 O	396.339	13.578	cpd:C05441	map00100 Steroid biosynthesis;map01100 Metabolic pathways	HMDB0000900	LMST03010001	Lipids and lipid-like molecules	Steroids and steroid derivatives	Vitamin D and derivatives	Sterol Lipids [ST]	Secosteroids [ST03]	Vitamin D2 and derivatives [ST0301]	No results	No results	Full match	649305	999120	1.70148e+06	228640	1.04245e+06	1.22353e+06	271298	263179	292108	268149	258673	240392	3.66705	1.87462	0.0105316	0.833333	1.68279	up
Com_472_pos	Indole-3-lactic acid	--	C11 H11 N O3	205.074	9.176	--	--	HMDB0000671	--	Organoheterocyclic compounds	Indoles and derivatives	Indolyl carboxylic acids and derivatives	--	--	--	Full match	Full match	Full match	3.52657e+08	3.56069e+08	348394566	1.15071e+08	3.67375e+08	2.63786e+08	111620133	1.77798e+08	144418344	1.22105e+08	1.63324e+08	1.27489e+08	2.12972	1.09067	0.0108786	0.861111	1.39611	up
Com_7951_pos	7,8-Dihydrofolate	Dihydrofolate; Dihydrofolic acid; 7,8-Dihydrofolate; 7,8-Dihydrofolic acid; 7,8-Dihydropteroylglutamate	C19 H21 N7 O6	443.156	9.045	cpd:C00415	map00670 One carbon pool by folate;map00790 Folate biosynthesis;map01100 Metabolic pathways;map01523 Antifolate resistance	HMDB0001056	--	Organic acids and derivatives	Carboxylic acids and derivatives	Amino acids, peptides, and analogues	--	--	--	No results	No results	Full match	515876	609767	1.03397e+06	885438	566853	707698	3.7324e+06	3.2456e+06	853300	1.41415e+06	3.93562e+06	1.06218e+06	0.303274	-1.72131	0.0113448	0.944444	1.39151	down
Com_809_pos	Taurodeoxycholic Acid (sodium salt)	--	C26 H45 N O6 S	499.296	13.304	--	--	--	--	--	--	--	--	--	--	Full match	No results	Full match	1.66549e+08	8.49433e+07	5.72996e+06	6.96881e+06	8.53569e+07	4.91396e+06	1.58492e+06	1.97095e+06	5.21468e+06	1.26276e+06	1.56866e+06	2.40003e+06	25.3151	4.66193	0.0114464	0.972222	1.53516	up
Com_9026_pos	(2E)-6-hydroxy-2-methyl-6-(4-methylphenyl)hept-2-enoic acid	--	C15 H20 O3	230.13	11.475	--	--	--	--	--	--	--	--	--	--	Invalid mass	No results	No results	2.82464e+06	2.4748e+06	1.2724e+06	1.45515e+06	1.99192e+06	1.26174e+06	1.08419e+06	1.07069e+06	1.25696e+06	959771	1.04303e+06	921109	1.78047	0.832261	0.011967	1	1.51759	up
Com_3596_pos	Isoproterenol	Isoproterenol; Isoprenaline	C11 H17 N O3	211.121	11.012	cpd:C07056	map04261 Adrenergic signaling in cardiomyocytes	--	--	--	--	--	--	--	--	No results	No results	Full match	566648	2.97137e+06	4.77167e+06	2.67664e+06	1.46538e+06	4.02439e+06	1.36618e+07	1.28716e+07	3.98901e+06	5.1132e+06	1.44737e+07	4.40962e+06	0.302208	-1.72638	0.0127737	0.916667	1.25905	down
Com_348_pos	Acetyl-L-carnitine	--	C9 H17 N O4	203.115	1.854	--	--	HMDB0000201	LMFA07070050	Lipids and lipid-like molecules	Fatty Acyls	Fatty acid esters	Fatty Acyls [FA]	Fatty esters [FA07]	Fatty acyl carnitines [FA0707]	Full match	Full match	Full match	63454566	2.25408e+08	1.22739e+08	2.61098e+08	1.97049e+08	1.84936e+08	2.7228e+08	392976078	3.97922e+08	290208447	3.37588e+08	3.92405e+08	0.506237	-0.982114	0.0138347	1	1.35063	down
Com_2399_pos	Andrographolide	Andrographolide	C20 H30 O5	332.198	12.248	cpd:C20214	--	--	--	--	--	--	--	--	--	Invalid mass	No results	No results	3.43511e+07	1.72211e+07	4.65229e+06	1.23063e+06	2.36449e+07	2.0975e+06	617963	570727	2.10019e+06	1.12554e+06	729053	1.57341e+06	12.3863	3.63068	0.0138637	0.916667	1.50204	up
Com_7559_pos	6 β-Hydroxycortisol	--	C21 H30 O6	360.193	11.318	--	--	--	--	--	--	--	--	--	--	Invalid mass	No results	No match	4.23111e+06	3.01478e+06	1.84469e+06	221364	3.41189e+06	1.04363e+06	263159	148236	594900	516658	214704	479292	6.21009	2.63462	0.0142089	0.888889	1.32793	up
Com_2885_pos	N-Acetylvaline	--	C7 H13 N O3	159.089	7.258	--	--	HMDB0011757	--	Organic acids and derivatives	Carboxylic acids and derivatives	Amino acids, peptides, and analogues	--	--	--	No results	No results	Full match	4.11808e+06	5.51779e+06	7.26888e+06	1.07627e+07	5.61999e+06	1.18744e+07	1.61885e+07	1.43102e+07	1.05468e+07	1.29836e+07	1.68351e+07	8.72524e+06	0.567436	-0.817472	0.0142308	0.888889	1.2491	down
Com_6021_pos	Glycohyocholic acid Sodium salt	--	C26 H42 N Na O6	487.289	11.886	--	--	--	--	--	--	--	--	--	--	No results	No results	Full match	6.70178e+06	3.72133e+06	255314	406648	3.08522e+06	193935	97496	97004.4	253689	88567.2	107304	90158.3	19.564	4.29013	0.0147423	0.972222	1.25803	up
Com_2977_pos	Celestolide	--	C17 H24 O	244.182	13.465	--	--	HMDB0031867	--	Benzenoids	Indanes	_	--	--	--	Full match	No results	No results	1.09582e+07	1.80207e+07	2.51023e+07	1.02918e+07	1.47463e+07	1.80356e+07	8.70683e+06	7.65932e+06	1.07105e+07	1.07076e+07	9.72956e+06	1.03773e+07	1.67824	0.746945	0.0159738	0.916667	1.39764	up
Com_9191_pos	4-(allyloxy)-1,2-dihydroquinolin-2-one	--	C12 H11 N O2	201.079	10.407	--	--	--	--	--	--	--	--	--	--	Full match	No results	No results	2.69676e+06	2.13783e+06	1.39976e+06	502947	2.35306e+06	1.02898e+06	572681	555340	477822	944260	566898	648237	2.68757	1.4263	0.0182236	0.861111	1.07991	up
Com_5524_pos	3,5-di(methylthio)-4-(2H-1,2,3,4-tetraazol-5-yl)isothiazole	--	C6 H7 N5 S3	261.009	10.454	--	--	--	--	--	--	--	--	--	--	Invalid mass	No results	No results	4.33516e+06	4.27667e+06	3.92904e+06	1.96583e+06	7.40899e+06	4.30879e+06	1.82916e+06	2.43982e+06	2.67101e+06	2.76845e+06	2.22382e+06	2.15152e+06	1.86204	0.89688	0.0213275	0.861111	1.03939	up
Com_4417_pos	ACar 15:0	--	C22 H44 N O4	385.318	13.676	--	--	--	--	--	--	--	--	--	--	No results	Invalid mass	No results	4.00307e+06	5.3911e+06	7.85095e+06	4.9501e+06	4.80346e+06	5.58901e+06	3.49313e+06	3.38601e+06	4.44643e+06	4.14522e+06	4.11037e+06	1.88159e+06	1.51834	0.602492	0.0229182	0.916667	1.0214	up
Com_5417_pos	Capryloylglycine	--	C10 H19 N O3	201.136	11.584	--	--	HMDB0000832	--	Organic acids and derivatives	Carboxylic acids and derivatives	Amino acids, peptides, and analogues	--	--	--	Full match	No results	No results	1.1843e+06	1.30306e+06	1.0786e+06	6.05097e+06	1.27012e+06	3.35507e+06	3.79002e+06	7.33652e+06	5.20684e+06	3.07383e+06	5.77588e+06	4.1634e+06	0.485309	-1.04302	0.0231891	0.833333	1.26875	down
Com_9075_pos	Prostaglandin B2	Prostaglandin B2; PGB2	C20 H30 O4	334.214	11.214	cpd:C05954	map00590 Arachidonic acid metabolism;map01100 Metabolic pathways;map04726 Serotonergic synapse	HMDB0004236	LMFA03010018	Lipids and lipid-like molecules	Fatty Acyls	Eicosanoids	Fatty Acyls [FA]	Eicosanoids [FA03]	Prostaglandins [FA0301]	No results	No results	Full match	1.11188e+06	2.18202e+06	2.92985e+06	1.55452e+06	1.44319e+06	2.07495e+06	1.22082e+06	964015	1.24877e+06	1.19869e+06	1.11968e+06	1.1356e+06	1.64011	0.713794	0.023243	0.861111	1.22403	up
Com_5782_pos	LPC 14:1	--	C22 H44 N O7 P	465.285	13.873	--	--	--	LMGP01050014	--	--	--	Glycerophospholipids [GP]	Glycerophosphocholines [GP01]	Monoacylglycerophosphocholines [GP0105]	No results	Full match	No results	7.22238e+06	6.25709e+06	6.49938e+06	3.31653e+06	6.64235e+06	4.41542e+06	2.64307e+06	2.89194e+06	4.60706e+06	3.96379e+06	3.79184e+06	4.4623e+06	1.53637	0.619522	0.0243972	0.833333	1.19008	up
Com_5662_pos	Tetranor-12(S)-HETE	--	C16 H26 O3	288.17	13.414	--	--	--	--	--	--	--	--	--	--	Invalid mass	No results	No results	2.50949e+06	2.96774e+06	5.38294e+06	3.00534e+06	2.15648e+06	4.7356e+06	1.70909e+06	963830	3.25461e+06	1.76599e+06	1.56129e+06	2.44941e+06	1.77351	0.826611	0.0257948	0.861111	1.0355	down
Com_7327_pos	Asp-Phe	--	C13 H16 N2 O5	280.106	7.505	--	--	--	--	--	--	--	--	--	--	No results	No results	Full match	2.17861e+06	1.84086e+06	1.2596e+06	4.13976e+06	2.60061e+06	2.41525e+06	1.68331e+06	1.12427e+06	1.85539e+06	819448	1.32315e+06	1.42761e+06	1.75323	0.810019	0.0261384	0.861111	1.06023	up
Com_624_pos	Inosine	Inosine	C10 H12 N4 O5	268.08	1.325	cpd:C00294	map00230 Purine metabolism;map01100 Metabolic pathways	HMDB0000195	--	Nucleosides, nucleotides, and analogues	Purine nucleosides	_	--	--	--	No results	No results	Full match	2.33032e+06	2.66452e+06	3.78182e+06	1.58264e+07	3.25838e+06	5.09467e+06	2.14934e+07	3.57118e+06	2.43383e+08	1.02517e+08	6.0169e+06	173950863	0.0598188	-4.06326	0.0331526	0.888889	1.23015	down
Com_4018_pos	PC (22:5e/2:0)	--	C32 H56 N O7 P	597.379	15.072	--	--	--	--	--	--	--	--	--	--	No results	Full match	No results	3.78966e+06	6.89714e+06	1.10808e+07	6.54258e+06	5.12005e+06	7.21198e+06	3.44799e+06	3.92331e+06	5.66525e+06	4.34972e+06	3.33453e+06	4.77467e+06	1.5941	0.672738	0.0344209	0.861111	1.16167	up
Com_619_pos	Hypoxanthine	Hypoxanthine; Purine-6-ol	C5 H4 N4 O	136.038	1.991	cpd:C00262	map00230 Purine metabolism;map01100 Metabolic pathways	HMDB0000157	--	Organoheterocyclic compounds	Imidazopyrimidines	Purines and purine derivatives	--	--	--	Full match	Full match	Full match	1.25865e+06	1.27242e+06	1.60183e+06	1.54051e+07	1.08784e+06	5.08103e+06	1.99645e+07	1.14108e+06	2.4657e+08	1.4107e+08	5.63667e+06	181713731	0.0431254	-4.53532	0.0370812	0.833333	1.05585	down
Com_9781_pos	6??-Hydroxytestosterone	--	C19 H28 O3	304.201	13.654	--	--	--	--	--	--	--	--	--	--	Invalid mass	No results	No results	901469	1.49919e+06	2.37089e+06	968259	1.1309e+06	1.73411e+06	662473	809694	1.03022e+06	1.01776e+06	918875	903457	1.61064	0.687638	0.0375568	0.833333	1.08241	up
Com_2386_pos	13,14-Dihydro-15-keto Prostaglandin A2	--	C20 H30 O4	316.203	12.539	--	--	--	--	--	--	--	--	--	--	Invalid mass	No results	No match	5.66522e+06	2.43514e+07	3.6638e+07	8.31345e+06	1.59855e+07	2.4571e+07	1.04481e+07	9.09878e+06	3.80571e+06	7.2106e+06	9.71985e+06	4.82062e+06	2.56131	1.35688	0.0413598	0.805556	1.20577	up
Com_11458_pos	N-Acetylneuraminic acid	N-Acetylneuraminate; N-Acetylneuraminic acid; 5-Acetamido-3,5-dideoxy-D-glycero-D-galacto-2-nonulosonic acid; Neu5Ac	C11 H19 N O9	326.132	7.624	cpd:C00270	map00520 Amino sugar and nucleotide sugar metabolism;map01100 Metabolic pathways	HMDB0000230	--	Organic oxygen compounds	Organooxygen compounds	Carbohydrates and carbohydrate conjugates	--	--	--	No results	Invalid mass	No results	170965	398828	506825	760874	217475	666510	730819	1.12506e+06	629410	602604	1.13564e+06	614500	0.562517	-0.830032	0.0426571	0.805556	1.16397	down
Com_11024_pos	Diosgenin	Diosgenin; (3beta,25R)-Spirost-5-en-3-ol	C27 H42 O3	396.302	12.273	cpd:C08898	--	--	LMST01080037	--	--	--	Sterol Lipids [ST]	Sterols [ST01]	Spirostanols and derivatives [ST0108]	Invalid mass	No results	No results	929671	944591	407997	192252	1.46165e+06	278099	223450	242977	224878	218640	240986	234864	3.04104	1.60457	0.0441761	0.833333	1.25777	up
Com_4148_pos	PC (22:6e/2:0)	--	C32 H54 N O7 P	595.363	14.835	--	--	--	--	--	--	--	--	--	--	No results	Full match	No results	1.63894e+06	7.80515e+06	1.40199e+07	6.63306e+06	5.00303e+06	8.41569e+06	1.93804e+06	2.83461e+06	1.96042e+06	4.35917e+06	3.47591e+06	2.79838e+06	2.50573	1.32523	0.0467066	0.833333	1.26381	up
Com_4876_pos	17alpha-Hydroxyprogesterone	17alpha-Hydroxyprogesterone; 17alpha-Hydroxy-4-pregnene-3,20-dione; Pregn-4-ene-3,20-dione-17-ol; 17alpha-Hydroxy-progesterone	C21 H30 O3	330.219	12.391	cpd:C01176	map00140 Steroid hormone biosynthesis;map01100 Metabolic pathways;map04913 Ovarian steroidogenesis;map04927 Cortisol synthesis and secretion;map04934 Cushing's syndrome	HMDB0000374	LMST02030161	Lipids and lipid-like molecules	Steroids and steroid derivatives	Pregnane steroids	Sterol Lipids [ST]	Steroids [ST02]	C21 steroids (gluco/mineralocorticoids, progestogins) and derivatives [ST0203]	No results	No results	Full match	6.88155e+06	8.47904e+06	1.04494e+07	2.09699e+06	6.77748e+06	6.17594e+06	2.67292e+06	3.69546e+06	3.02506e+06	4.00546e+06	3.54575e+06	3.5465e+06	1.99405	0.995702	0.0473539	0.833333	1.01053	up
Com_1363_pos	Ergosta-5,7,9(11),22-Tetraen-3-beta-Ol	--	C28 H42 O	394.323	13.598	--	--	--	--	--	--	--	--	--	--	No results	No results	Full match	3.20113e+07	3.55241e+07	5.62486e+06	4.33153e+07	2.86626e+07	3.35007e+06	3.91333e+07	6.64146e+07	5.04195e+07	6.90501e+07	5.51866e+07	5.11929e+07	0.448068	-1.15821	0.0496608	0.972222	1.01569	down
Com_3038_neg	Gibberellin A4	Gibberellin A4	C19 H24 O5	332.163	8.626	cpd:C11864	--	--	LMPR0104170021	--	--	--	Prenol Lipids [PR]	Isoprenoids [PR01]	C20 isoprenoids (diterpenes) [PR0104]	Full match	No results	No results	27670.6	26582.8	26915.5	23754	25899	25051.9	3.43754e+06	4.04329e+06	3.78594e+06	4.28885e+06	3.86798e+06	3.84955e+06	0.00669758	-7.22214	1.59e-16	1	1.59252	down
Com_3096_neg	2-[(1H-1,2,4-triazol-3-ylimino)methyl]phenol	--	C9 H8 N4 O	188.072	9.849	--	--	--	--	--	--	--	--	--	--	Invalid mass	No results	No results	22901.8	24791.1	21779.1	20210.7	20587.3	20968.9	5.86742e+06	4.09456e+06	3.11694e+06	3.41829e+06	4.90653e+06	3.23824e+06	0.00532583	-7.55278	6.68e-09	1	1.62594	down
Com_3003_neg	8-Iso prostaglandin A2	--	C20 H30 O4	334.212	12.751	--	--	--	--	--	--	--	--	--	--	Invalid mass	No results	No results	4.69358e+06	4.35536e+06	3.52414e+06	3.95745e+06	4.78154e+06	4.02342e+06	1.1144e+06	1.56507e+06	1.09357e+06	1.54984e+06	1.36492e+06	1.72993e+06	3.00978	1.58966	1.4e-06	1	2.014	up
Com_4331_neg	(5ξ,9ξ)-17-Hydroxykaur-15-en-19-oic acid	--	C20 H30 O3	318.22	11.66	--	--	--	--	--	--	--	--	--	--	Full match	No results	No results	2.46452e+06	2.43838e+06	2.20809e+06	1.46673e+06	2.44855e+06	1.7094e+06	480011	478705	916782	499216	480389	677208	3.60548	1.85019	4.81e-06	1	1.94117	up
Com_3389_neg	PG (16:0/18:2)	--	C40 H75 O10 P	746.511	16.151	--	--	--	--	--	--	--	--	--	--	No results	Full match	No results	1.43584e+06	1.20331e+06	1.00282e+06	1.74615e+06	1.54011e+06	1.33998e+06	3.30317e+06	3.6942e+06	2.79717e+06	2.83981e+06	4.15535e+06	3.03317e+06	0.417105	-1.26152	8.07e-06	1	1.93926	down
Com_1610_neg	(±)9-HpODE	--	C18 H32 O4	294.22	12.94	--	--	--	--	--	--	--	--	--	--	Invalid mass	No results	No match	8.22096e+06	1.06646e+07	1.31874e+07	8.23389e+06	9.77552e+06	9.12584e+06	3.8634e+06	3.9171e+06	4.88616e+06	5.09961e+06	4.02161e+06	5.3327e+06	2.18315	1.12641	1.21e-05	1	1.4779	up
Com_6557_neg	delta-Tocopherol	delta-Tocopherol	C27 H46 O2	402.35	16.483	cpd:C14151	map00130 Ubiquinone and other terpenoid-quinone biosynthesis;map01100 Metabolic pathways	HMDB0002902	LMPR02020066	Lipids and lipid-like molecules	Prenol lipids	Quinone and hydroquinone lipids	Prenol Lipids [PR]	Quinones and hydroquinones [PR02]	Vitamin E [PR0202]	No results	No results	Full match	900473	662322	555084	577152	890846	623878	98558.3	164718	275063	131250	194480	131421	4.22882	2.08025	2.18e-05	1	1.83218	up
Com_2234_neg	PC (2:0/18:3)	--	C28 H50 N O8 P	619.349	13.55	--	--	--	--	--	--	--	--	--	--	No results	Invalid mass	No results	4.22081e+06	7.48401e+06	8.00758e+06	6.35544e+06	5.83756e+06	6.84351e+06	2.12683e+06	2.31496e+06	3.49387e+06	2.51378e+06	2.45286e+06	3.3791e+06	2.37995	1.25093	4.42e-05	1	1.8985	up
Com_4746_neg	L-Argininosuccinic acid	N-(L-Arginino)succinate; 2-(Nomega-L-Arginino)succinate; L-Argininosuccinate; L-Argininosuccinic acid; L-Arginosuccinic acid	C10 H18 N4 O6	290.123	1.187	cpd:C03406	map00220 Arginine biosynthesis;map00250 Alanine, aspartate and glutamate metabolism;map01100 Metabolic pathways;map01230 Biosynthesis of amino acids	HMDB0000052	--	Organic acids and derivatives	Carboxylic acids and derivatives	Amino acids, peptides, and analogues	--	--	--	No results	No results	Full match	2.18003e+06	1.93056e+06	1.76552e+06	1.51172e+06	1.77172e+06	1.82362e+06	577102	573317	967365	698528	649542	981953	2.46935	1.30413	5.51e-05	1	2.07529	up
Com_2109_neg	cholesteryl sulfate	--	C27 H46 O4 S	466.31	12.66	--	--	HMDB0000653	LMST05020016	Lipids and lipid-like molecules	Steroids and steroid derivatives	Cholestane steroids	Sterol Lipids [ST]	Steroid conjugates [ST05]	Sulfates [ST0502]	No results	No results	Full match	9.07603e+06	7.36843e+06	6.72216e+06	1.58715e+06	7.38949e+06	3.86554e+06	191906	817970	1.34634e+06	275311	496403	704798	9.39509	3.23191	0.000178807	1	1.52987	up
Com_218_neg	Ascorbic acid	Ascorbate; Ascorbic acid; L-Ascorbate; L-Ascorbic acid; Vitamin C	C6 H8 O6	130.026	1.249	cpd:C00072	map00053 Ascorbate and aldarate metabolism;map00480 Glutathione metabolism;map01100 Metabolic pathways;map04066 HIF-1 signaling pathway;map04977 Vitamin digestion and absorption	HMDB0000044	--	Organoheterocyclic compounds	Dihydrofurans	Furanones	--	--	--	Invalid mass	No results	No match	4.25698e+07	4.7671e+07	3.91768e+07	7.44883e+07	3.7015e+07	5.47196e+07	1.33941e+08	9.11883e+07	1.06297e+08	7.59254e+07	114565690	108407884	0.469029	-1.09225	0.000219189	1	1.58049	down
Com_4764_neg	Orotic Acid	Orotate; Orotic acid; Uracil-6-carboxylic acid	C5 H4 N2 O4	156.017	1.331	cpd:C00295	map00240 Pyrimidine metabolism;map01100 Metabolic pathways	HMDB0000226	--	Organoheterocyclic compounds	Diazines	Pyrimidines and pyrimidine derivatives	--	--	--	No results	No results	Full match	1.48004e+06	2.01685e+06	1.32802e+06	1.28717e+06	1.88266e+06	1.3397e+06	925911	654472	1.07983e+06	800271	873678	801155	1.81769	0.862108	0.000224297	1	1.60249	up
Com_182_neg	D-(+)-Malic acid	--	C4 H6 O5	134.021	1.143	--	--	HMDB0031518	--	Lipids and lipid-like molecules	Fatty Acyls	Fatty acids and conjugates	--	--	--	Full match	Full match	Full match	144862147	1.21852e+08	1.90065e+08	1.15075e+08	1.35698e+08	1.08595e+08	4.61339e+07	4.38865e+07	8.95932e+07	4.80841e+07	4.47478e+07	7.53914e+07	2.34635	1.23042	0.000303084	1	1.86975	up
Com_3094_neg	N-(1,1-Dioxotetrahydro-1H-1λ6-thiophen-3-yl)-4-methoxybenzamide	--	C12 H15 N O4 S	269.073	9.631	--	--	--	--	--	--	--	--	--	--	Full match	No results	No results	4.24669e+06	4.23089e+06	4.35757e+06	1.26127e+06	4.54979e+06	2.87365e+06	308561	290876	1.46206e+06	407940	299117	844254	5.95656	2.57448	0.000306848	0.972222	1.75973	up
Com_267_neg	(+/-)12(13)-DiHOME	--	C18 H34 O4	296.235	13.238	--	--	--	--	--	--	--	--	--	--	Invalid mass	No results	No results	6.19766e+07	9.38951e+07	1.23613e+08	6.66431e+07	7.90016e+07	9.79463e+07	3.92359e+07	3.52943e+07	3.85789e+07	5.09502e+07	3.64176e+07	4.25486e+07	2.15235	1.10591	0.000314916	1	1.54155	up
Com_113_neg	D-Malic Acid	--	C4 H6 O5	134.021	1.189	--	--	HMDB0031518	--	Lipids and lipid-like molecules	Fatty Acyls	Fatty acids and conjugates	--	--	--	No results	No results	Full match	3.48418e+08	2.3754e+08	3.82679e+08	1.80291e+08	2.21654e+08	2.25456e+08	8.64992e+07	8.78088e+07	1.71148e+08	1.21905e+08	8.77571e+07	1.26967e+08	2.33994	1.22647	0.000425513	1	1.66373	up
Com_3152_neg	Sulfoacetic acid	Sulfoacetate; Sulfoacetic acid	C2 H4 O5 S	139.978	1.163	cpd:C14179	map00430 Taurine and hypotaurine metabolism	--	--	--	--	--	--	--	--	No results	No results	Full match	1.64524e+06	2.41222e+06	1.67066e+06	1.20949e+06	1.91694e+06	1.00916e+06	5.38603e+06	3.9836e+06	2.85012e+06	2.78565e+06	4.7512e+06	3.56019e+06	0.42303	-1.24117	0.000453783	1	1.46861	down
Com_2913_neg	Prostaglandin K2	--	C20 H30 O5	332.199	10.97	--	--	--	LMFA03010023	--	--	--	Fatty Acyls [FA]	Eicosanoids [FA03]	Prostaglandins [FA0301]	Invalid mass	No results	No results	4.59141e+06	4.78999e+06	5.19753e+06	3.32495e+06	3.99525e+06	4.52084e+06	2.6016e+06	2.64392e+06	3.05233e+06	3.22399e+06	2.72591e+06	2.96276e+06	1.53511	0.618339	0.000490714	1	1.18048	up
Com_2742_neg	gamma-Glutamylglutamic acid	--	C10 H16 N2 O7	276.096	1.146	--	--	HMDB0011737	--	Organic acids and derivatives	Carboxylic acids and derivatives	Amino acids, peptides, and analogues	--	--	--	No results	No results	Full match	2.89123e+06	2.98829e+06	3.90464e+06	5.25231e+06	2.90185e+06	4.50648e+06	2.42727e+06	1.62978e+06	1.90684e+06	1.77284e+06	1.85996e+06	2.05379e+06	1.92651	0.945992	0.000789514	1	1.87302	up
Com_543_neg	L-Glutamic acid	L-Glutamate; L-Glutamic acid; L-Glutaminic acid; Glutamate	C5 H9 N O4	147.053	1.2	cpd:C00025	map00220 Arginine biosynthesis;map00250 Alanine, aspartate and glutamate metabolism;map00330 Arginine and proline metabolism;map00340 Histidine metabolism;map00430 Taurine and hypotaurine metabolism;map00471 D-Glutamine and D-glutamate metabolism;map00480 Glutathione metabolism;map00524 Neomycin, kanamycin and gentamicin biosynthesis;map00630 Glyoxylate and dicarboxylate metabolism;map00650 Butan…	HMDB0000148	--	Organic acids and derivatives	Carboxylic acids and derivatives	Amino acids, peptides, and analogues	--	--	--	Full match	Full match	Full match	5.37293e+07	4.76232e+07	4.62236e+07	4.81448e+07	4.94389e+07	4.70522e+07	3.18059e+07	2.19569e+07	3.63606e+07	2.23208e+07	2.67305e+07	3.09683e+07	1.71745	0.780267	0.000792568	1	1.92194	up
Com_6182_neg	9,10-Dihome	--	C18 H34 O4	314.246	12.352	--	--	HMDB0031679	LMFA02000229	Lipids and lipid-like molecules	Fatty Acyls	Fatty acids and conjugates	Fatty Acyls [FA]	Octadecanoids [FA02]	Other Octadecanoids [FA0200]	No results	No results	Full match	1.01896e+06	1.05483e+06	734303	538456	1.07541e+06	688537	413618	351533	350720	411795	414300	372380	2.20818	1.14286	0.000826613	1	1.81855	up
Com_1097_neg	13(S)-HOTrE	13(S)-HOT; (9Z,11E,15Z)-(13S)-Hydroxyoctadeca-9,11,15-trienoate; (9Z,11E,15Z)-(13S)-13-Hydroxyoctadeca-9,11,15-trienoic acid; (9Z,11E,13S,15Z)-13-Hydroxyoctadeca-9,11,15-trienoic acid; 13(S)-HOTrE	C18 H30 O3	294.22	13.161	cpd:C16316	map00592 alpha-Linolenic acid metabolism	--	--	--	--	--	--	--	--	Full match	No results	Full match	9.23016e+06	1.66167e+07	2.22964e+07	1.22421e+07	1.33389e+07	1.77132e+07	6.88789e+06	5.31886e+06	6.64464e+06	7.28924e+06	6.44666e+06	6.68148e+06	2.3285	1.2194	0.000834956	1	1.52512	up
Com_558_neg	PE (16:0/20:4)	--	C41 H74 N O8 P	739.517	16.566	--	--	--	LMGP02010096	--	--	--	Glycerophospholipids [GP]	Glycerophosphoethanolamines [GP02]	Diacylglycerophosphoethanolamines [GP0201]	No results	Full match	No results	1.3592e+07	1.19944e+07	7.74952e+06	3.65874e+06	1.43415e+07	1.13634e+07	3.60112e+07	27504075	5.51438e+07	2.01716e+07	2.54695e+07	4.47041e+07	0.299992	-1.737	0.00101996	1	1.90065	down
Com_894_neg	Thymidine	Thymidine; Deoxythymidine	C10 H14 N2 O5	242.09	5.725	cpd:C00214	map00240 Pyrimidine metabolism;map01100 Metabolic pathways	HMDB0000273	--	Nucleosides, nucleotides, and analogues	Pyrimidine nucleosides	Pyrimidine 2'-deoxyribonucleosides	--	--	--	Full match	No results	Full match	1.31323e+07	1.32527e+07	1.48556e+07	2.03351e+07	1.30675e+07	1.42395e+07	2.27404e+07	1.94718e+07	2.76374e+07	2.25965e+07	2.28548e+07	1.85372e+07	0.664105	-0.590516	0.0010696	0.944444	1.30586	down
Com_1302_neg	Cholic acid	Cholic acid; Cholate; 3alpha,7alpha,12alpha-Trihydroxy-5beta-cholanate; 3alpha,7alpha,12alpha-Trihydroxy-5beta-cholanic acid	C24 H40 O5	408.288	11.326	cpd:C00695	map00120 Primary bile acid biosynthesis;map01100 Metabolic pathways;map04976 Bile secretion	HMDB0000619	LMST04010001	Lipids and lipid-like molecules	Steroids and steroid derivatives	Bile acids, alcohols and derivatives	Sterol Lipids [ST]	Bile acids and derivatives [ST04]	C24 bile acids, alcohols, and derivatives [ST0401]	Full match	No results	Full match	3.84949e+06	9.49636e+06	1.77958e+07	3.16857e+06	6.6758e+06	1.0769e+07	577262	3.73393e+06	1.1383e+06	1.13199e+06	2.18843e+06	1.24594e+06	5.16731	2.36941	0.00130761	0.972222	1.38445	up
Com_7_neg	16-Hydroxyhexadecanoic acid	--	C16 H32 O3	254.225	14.246	--	--	HMDB0006294	--	Lipids and lipid-like molecules	Fatty Acyls	Fatty acids and conjugates	--	--	--	Invalid mass	No results	No match	2866224902	2781734400	2663100368	3795888493	2851361303	3438618501	3722770929	5467751946	4577500341	7422584967	4742725411	6000851800	0.576089	-0.795637	0.00143951	0.972222	1.58639	down
Com_2759_neg	(3β,5ξ,9ξ)-3,23-Dihydroxy-1-oxoolean-12-en-28-oic acid	--	C30 H46 O5	486.335	12.46	--	--	--	--	--	--	--	--	--	--	Full match	No results	No results	5.86231e+06	3.30524e+06	963691	772190	5.00435e+06	976768	169160	345957	332585	155875	267061	227097	11.2734	3.49485	0.00144295	1	1.91474	up
Com_1487_neg	(±)12(13)-DiHOME	--	C18 H34 O4	314.246	12.732	--	--	--	--	--	--	--	--	--	--	Full match	Full match	Full match	9.04988e+06	1.11036e+07	1.4885e+07	4.4443e+06	1.2261e+07	9.98948e+06	3.66564e+06	2.97131e+06	3.59361e+06	4.11972e+06	3.35489e+06	4.75937e+06	2.74803	1.4584	0.00151152	0.972222	1.59798	up
Com_1351_neg	LPI 18:1	--	C27 H51 O12 P	598.313	14.208	--	--	--	LMGP06050005	--	--	--	Glycerophospholipids [GP]	Glycerophosphoinositols [GP06]	Monoacylglycerophosphoinositols [GP0605]	No results	Full match	No results	1.61967e+07	1.37544e+07	1.52916e+07	1.37218e+07	1.4696e+07	1.49405e+07	5.48027e+06	6.40373e+06	9.37912e+06	1.01325e+07	6.42627e+06	1.00841e+07	1.84948	0.887118	0.00171891	1	1.84143	up
Com_768_neg	Succinic Acid	Succinate; Succinic acid; Butanedionic acid; Ethylenesuccinic acid	C4 H6 O4	118.026	1.272	cpd:C00042	map00020 Citrate cycle (TCA cycle);map00190 Oxidative phosphorylation;map00250 Alanine, aspartate and glutamate metabolism;map00350 Tyrosine metabolism;map00360 Phenylalanine metabolism;map00620 Pyruvate metabolism;map00630 Glyoxylate and dicarboxylate metabolism;map00640 Propanoate metabolism;map00650 Butanoate metabolism;map00760 Nicotinate and nicotinamide metabolism;map00920 Sulfur metabolism	HMDB0000254	LMFA01170043	Organic acids and derivatives	Carboxylic acids and derivatives	Dicarboxylic acids and derivatives	Fatty Acyls [FA]	Fatty Acids and Conjugates [FA01]	Dicarboxylic acids [FA0117]	No results	No results	Full match	3.73718e+07	1.70782e+07	1.1084e+07	9.20994e+06	1.61945e+07	1.12833e+07	3.40914e+06	5.10585e+06	7.41412e+06	5.97989e+06	3.01824e+06	6.60628e+06	3.24168	1.69674	0.00174746	1	1.69218	up
Com_4726_neg	LPE 22:1	--	C27 H54 N O7 P	535.364	15.821	--	--	--	LMGP02050068	--	--	--	Glycerophospholipids [GP]	Glycerophosphoethanolamines [GP02]	Monoacylglycerophosphoethanolamines [GP0205]	No results	Full match	No results	880000	865460	703066	1.26595e+06	830085	982059	1.24289e+06	1.59112e+06	1.38077e+06	1.46444e+06	1.2374e+06	1.42025e+06	0.662913	-0.593109	0.00189072	0.944444	1.48618	down
Com_138_neg	N-Acetylphenylalanine	--	C11 H13 N O3	207.09	8.166	--	--	HMDB0000512	--	Organic acids and derivatives	Carboxylic acids and derivatives	Amino acids, peptides, and analogues	--	--	--	No results	No results	Full match	270607793	2.25832e+08	2.00071e+08	7.77755e+07	2.68866e+08	1.47286e+08	4.52317e+07	6.76792e+07	7.76514e+07	6.5122e+07	6.07173e+07	8.26858e+07	2.9829	1.57672	0.00193133	0.972222	1.63519	up
Com_394_neg	2-Ketohexanoic acid	--	C6 H10 O3	130.063	5.575	--	--	HMDB0001864	--	Organic acids and derivatives	Keto acids and derivatives	Medium-chain keto acids and derivatives	--	--	--	No results	No results	Full match	2.88115e+07	2.47824e+07	2.7529e+07	3.19413e+07	2.94939e+07	2.76393e+07	4.40343e+07	4.80671e+07	4.70296e+07	6.60115e+07	3.9914e+07	8.29613e+07	0.518866	-0.946565	0.0019859	1	1.90368	down
Com_551_neg	D-Ribulose 5-phosphate	D-Ribulose 5-phosphate	C5 H11 O8 P	194.042	1.193	cpd:C00199	map00030 Pentose phosphate pathway;map00040 Pentose and glucuronate interconversions;map00740 Riboflavin metabolism;map00750 Vitamin B6 metabolism;map01100 Metabolic pathways;map01200 Carbon metabolism;map01230 Biosynthesis of amino acids	HMDB0000618	--	Organooxygen compounds	Carbohydrates and carbohydrate conjugates	Monosaccharides	--	--	--	Invalid mass	Invalid mass	No match	1.98668e+07	2.91381e+07	3.98174e+07	2.59049e+07	2.32548e+07	3.27693e+07	6.45251e+07	3.71406e+07	4.44743e+07	4.35526e+07	4.86419e+07	4.97955e+07	0.592619	-0.754824	0.0020634	0.972222	1.31971	down
Com_1750_neg	L-Gulono-gamma-lactone	L-Gulono-1,4-lactone; L-Gulono-gamma-lactone; gamma-Gulonolactone; L-Gulonic acid gamma-lactone; L-Gulonolactone	C6 H10 O6	178.048	1.288	cpd:C01040	map00053 Ascorbate and aldarate metabolism;map01100 Metabolic pathways	HMDB0003466	--	Organoheterocyclic compounds	Lactones	Gamma butyrolactones	--	--	--	No results	No results	Full match	5.61968e+06	6.39041e+06	8.63898e+06	5.04243e+06	3.91311e+06	4.68732e+06	1.09638e+07	8.76731e+06	1.00631e+07	1.03462e+07	8.6383e+06	1.12124e+07	0.571616	-0.806881	0.00217213	0.972222	1.67547	down
Com_49_neg	LPE 22:6	--	C27 H44 N O7 P	525.286	14.465	--	--	--	LMGP02050060	--	--	--	Glycerophospholipids [GP]	Glycerophosphoethanolamines [GP02]	Monoacylglycerophosphoethanolamines [GP0205]	No results	Full match	No results	3.98826e+08	4.04513e+08	4.16565e+08	8.03455e+08	408695468	5.955e+08	9.79991e+08	9.68723e+08	7.47405e+08	8.34279e+08	9.71717e+08	8.29025e+08	0.5679	-0.816291	0.00268007	0.972222	1.62669	down
Com_1422_neg	Hexadecanedioic acid	--	C16 H30 O4	286.215	12.296	--	--	HMDB0000712	LMFA01170022	Lipids and lipid-like molecules	Fatty Acyls	Fatty acid esters	Fatty Acyls [FA]	Fatty Acids and Conjugates [FA01]	Dicarboxylic acids [FA0117]	Full match	No results	Full match	1.6314e+07	1.2229e+07	8.9758e+06	7.34576e+06	1.48726e+07	7.89764e+06	5.14283e+06	4.88178e+06	5.90388e+06	4.98702e+06	4.95934e+06	5.54666e+06	2.1525	1.10601	0.00282875	1	1.8892	up
Com_2763_neg	Corchorifatty acid F	--	C18 H32 O5	328.225	10.891	--	--	HMDB0035919	--	Lipids and lipid-like molecules	Fatty Acyls	Lineolic acids and derivatives	--	--	--	Full match	No results	No results	5.84959e+06	4.27263e+06	2.64288e+06	652626	5.37267e+06	1.572e+06	314961	451647	553466	585985	368064	550447	7.20902	2.8498	0.00292453	1	1.8329	up
Com_3593_neg	N1-[4-(cyanomethyl)phenyl]-4-chlorobenzamide	--	C15 H11 Cl N2 O	270.053	10.871	--	--	--	--	--	--	--	--	--	--	Invalid mass	No results	No results	3.46375e+06	3.2078e+06	3.21402e+06	3.02297e+06	3.46859e+06	3.05801e+06	675299	138028	1.38568e+06	149655	484276	686871	5.52164	2.4651	0.00294807	1	1.89726	up
Com_292_neg	PE (16:0/22:6)	--	C43 H74 N O8 P	763.517	16.328	--	--	--	LMGP02010095	--	--	--	Glycerophospholipids [GP]	Glycerophosphoethanolamines [GP02]	Diacylglycerophosphoethanolamines [GP0201]	No results	Full match	No results	2.51299e+07	1.96101e+07	1.55445e+07	6.69213e+06	3.46791e+07	1.47271e+07	8.02845e+07	5.0966e+07	1.23328e+08	2.74971e+07	4.08631e+07	8.08185e+07	0.28825	-1.79461	0.00296255	0.972222	1.75863	down
Com_293_neg	LPC 14:0	--	C22 H46 N O7 P	527.322	14.268	--	--	--	LMGP01050073	--	--	--	Glycerophospholipids [GP]	Glycerophosphocholines [GP01]	Monoacylglycerophosphocholines [GP0105]	No results	Invalid mass	No results	7.50875e+07	9.75834e+07	1.12571e+08	5.99482e+07	8.23998e+07	8.84322e+07	5.13989e+07	5.0174e+07	6.70117e+07	5.15892e+07	5.42202e+07	5.6968e+07	1.55727	0.639023	0.0031587	0.972222	1.51504	up
Com_97_neg	PI (16:0/20:4)	--	C45 H79 O13 P	858.527	16.043	--	--	--	--	--	--	--	--	--	--	No results	Full match	No results	2.32024e+08	1.98964e+08	1.60682e+08	2.92273e+08	1.77847e+08	2.47449e+08	229961772	3.64459e+08	3.66803e+08	3.93995e+08	3.16084e+08	3.42983e+08	0.649977	-0.62154	0.00469082	0.916667	1.58529	down
Com_895_neg	(3beta,9xi)-3-(beta-D-Glucopyranosyloxy)-14-hydroxycard-20(22)-enolide	--	C29 H44 O9	582.305	11.281	--	--	--	--	--	--	--	--	--	--	Invalid mass	No results	No results	1.53347e+06	1.5793e+07	3.00723e+07	689703	6.04467e+06	1.65219e+07	99582.7	498064	915048	448698	397226	608101	23.8159	4.57385	0.0049764	0.972222	1.32414	up
Com_2348_neg	N-lactoyl-phenylalanine	--	C12 H15 N O4	237.1	7.945	--	--	--	--	--	--	--	--	--	--	No results	No results	Full match	7.65546e+06	3.75311e+06	2.3767e+06	2.38883e+06	7.10077e+06	2.4041e+06	1.41673e+06	1.06558e+06	2.34702e+06	1.0294e+06	1.30462e+06	1.52639e+06	2.95509	1.5632	0.00513102	1	1.76684	up
Com_5211_neg	Pyrophosphate	Diphosphate; Diphosphoric acid; Pyrophosphate; Pyrophosphoric acid; PPi	H4 O7 P2	177.943	1.186	cpd:C00013	map00190 Oxidative phosphorylation;map05012 Parkinson's disease	HMDB0000250	--	Homogeneous non-metal compounds	Non-metal oxoanionic compounds	Non-metal pyrophosphates	--	--	--	No results	No results	Full match	756664	192929	261209	255486	420472	234402	989525	667415	1.89418e+06	419356	793196	1.57959e+06	0.334396	-1.58037	0.00536057	0.916667	1.65882	down
Com_5961_neg	Propionyl-L-carnitine	--	C10 H19 N O4	217.132	9.225	--	--	HMDB0000824	--	Lipids and lipid-like molecules	Fatty Acyls	Fatty acid esters	--	--	--	No results	No results	Full match	151133	165567	246522	666194	175513	468899	532290	1.18874e+06	814083	599387	970691	709474	0.389192	-1.36145	0.00588995	0.944444	1.50537	down
Com_609_neg	gamma-Nonanolactone	--	C9 H16 O2	156.115	11.087	--	--	--	--	--	--	--	--	--	--	No results	No results	Full match	3.66787e+06	6.2969e+06	8.68503e+06	1.18208e+07	5.4038e+06	9.60656e+06	2.84983e+07	3.05144e+07	1.49907e+07	9.1177e+06	3.27211e+07	1.21147e+07	0.35544	-1.49232	0.00616058	0.944444	1.26152	down
Com_1384_neg	5-(3-cyclohexylprop-1-ynyl)nicotinic acid	--	C15 H17 N O2	243.126	11.383	--	--	--	--	--	--	--	--	--	--	Full match	No results	No results	1.70223e+07	8.03277e+06	290089	1.21131e+06	1.23526e+07	835816	243574	47589.2	461959	90666.9	153202	211135	32.8979	5.03993	0.00626503	0.972222	1.25459	up
Com_5965_neg	23-Norcholic acid	--	C23 H38 O5	394.272	11.425	--	--	--	--	--	--	--	--	--	--	No results	No results	Full match	1.18564e+06	910026	573276	176363	1.20718e+06	410423	48067.8	96053.2	460562	156335	65225.5	227646	4.23471	2.08226	0.00701918	0.916667	1.43021	up
Com_470_neg	Erythronolactone	--	C4 H6 O4	118.027	1.202	--	--	--	--	--	--	--	--	--	--	No results	Full match	Full match	6.50244e+07	3.98655e+07	2.00472e+07	1.66575e+07	5.38616e+07	1.92518e+07	1.03767e+07	1.09156e+07	1.47274e+07	1.00302e+07	1.00362e+07	1.20218e+07	3.15247	1.65648	0.00714369	1	1.55986	up
Com_896_neg	D-Glucose 6-phosphate	D-Glucose 6-phosphate; Glucose 6-phosphate; Robison ester	C6 H13 O9 P	260.03	1.18	cpd:C00092	map00500 Starch and sucrose metabolism;map00524 Neomycin, kanamycin and gentamicin biosynthesis;map00562 Inositol phosphate metabolism;map01100 Metabolic pathways;map04911 Insulin secretion;map04917 Prolactin signaling pathway;map04918 Thyroid hormone synthesis;map04931 Insulin resistance;map04973 Carbohydrate digestion and absorption;map05230 Central carbon metabolism in cancer	HMDB0001401	--	Organic oxygen compounds	Organooxygen compounds	Carbohydrates and carbohydrate conjugates	--	--	--	Full match	Not the top hit	Full match	2.62193e+07	2.65933e+07	3.0031e+07	1.47035e+07	2.67847e+07	2.19228e+07	1.80316e+07	1.28093e+07	1.73336e+07	1.335e+07	1.47663e+07	1.71028e+07	1.566	0.647085	0.00715851	0.888889	1.3214	up
Com_67_neg	LPE 20:4	--	C25 H44 N O7 P	501.286	14.504	--	--	--	LMGP02050067	--	--	--	Glycerophospholipids [GP]	Glycerophosphoethanolamines [GP02]	Monoacylglycerophosphoethanolamines [GP0205]	No results	Full match	No match	3.05949e+08	3.20488e+08	3.25622e+08	6.3532e+08	3.13397e+08	4.57144e+08	6.16471e+08	7.00223e+08	5.88045e+08	5.85898e+08	655411854	6.04601e+08	0.62867	-0.669626	0.00786342	0.888889	1.58271	down
Com_3850_neg	Thromboxane B1	--	C20 H36 O6	354.241	11.933	--	--	--	LMFA03030008	--	--	--	Fatty Acyls [FA]	Eicosanoids [FA03]	Thromboxanes [FA0303]	Invalid mass	No results	No match	1.39319e+06	2.20519e+06	3.1605e+06	1.34203e+06	1.90646e+06	2.16533e+06	1.13679e+06	963188	1.43271e+06	1.09969e+06	1.11098e+06	1.18607e+06	1.75667	0.812842	0.00809197	0.944444	1.34928	up
Com_2341_neg	Tetradecanedioic acid	--	C14 H26 O4	258.183	11.315	--	--	HMDB0000872	LMFA01170018	Lipids and lipid-like molecules	Fatty Acyls	Fatty acids and conjugates	Fatty Acyls [FA]	Fatty Acids and Conjugates [FA01]	Dicarboxylic acids [FA0117]	Full match	No results	Full match	7.68606e+06	4.9864e+06	3.98172e+06	2.47762e+06	5.85101e+06	2.94749e+06	2.11552e+06	1.95128e+06	2.71289e+06	2.12095e+06	2.1316e+06	2.0416e+06	2.13635	1.09515	0.00939709	0.972222	1.57617	up
Com_6150_neg	19(R)-Hydroxy-prostaglandin E2	--	C20 H32 O6	350.21	9.734	--	--	HMDB0001908	LMFA03010024	Lipids and lipid-like molecules	Fatty Acyls	Eicosanoids	Fatty Acyls [FA]	Eicosanoids [FA03]	Prostaglandins [FA0301]	Invalid mass	No results	No results	1.07442e+06	986919	945533	241293	1.09591e+06	623310	244278	202458	438857	349031	234791	401689	2.65479	1.4086	0.0109726	0.888889	1.21085	up
Com_548_neg	PE (18:0/20:4)	--	C43 H78 N O8 P	767.548	16.126	--	--	--	LMGP02010129	--	--	--	Glycerophospholipids [GP]	Glycerophosphoethanolamines [GP02]	Diacylglycerophosphoethanolamines [GP0201]	No results	Full match	No results	3.46608e+07	2.05011e+07	1.82148e+07	1.18089e+07	2.37787e+07	2.38047e+07	4.48642e+07	3.5935e+07	4.241e+07	4.57612e+07	2.89165e+07	2.62124e+07	0.592456	-0.75522	0.0120506	0.944444	1.03344	down
Com_1004_neg	LPC 15:0	--	C23 H48 N O7 P	541.339	14.401	--	--	--	LMGP01050016	--	--	--	Glycerophospholipids [GP]	Glycerophosphocholines [GP01]	Monoacylglycerophosphocholines [GP0105]	No results	Invalid mass	No results	7.03699e+06	1.64582e+07	2.57384e+07	9.51721e+06	1.08734e+07	1.65087e+07	5.82314e+06	5.89846e+06	9.40233e+06	5.72448e+06	5.91618e+06	6.9472e+06	2.16895	1.117	0.012239	0.972222	1.4332	up
Com_1214_neg	PC (16:0e/18:2)	--	C42 H82 N O7 P	803.606	16.289	--	--	--	--	--	--	--	--	--	--	No results	Invalid mass	No results	1.36719e+07	1.22934e+07	1.92149e+07	1.47338e+07	1.03935e+07	1.14253e+07	1.31943e+07	1.07075e+07	7.8947e+06	6.86283e+06	6.14731e+06	7.96671e+06	1.54875	0.631107	0.0124391	0.888889	1.4348	up
Com_4048_neg	Fexofenadine	Fexofenadine; 4-(1-Hydroxy-4-(4-(hydroxydiphenylmethyl)-1-piperidinyl)butyl)-alpha,alpha-dimethylbenzeneacetic acid	C32 H39 N O4	501.286	15.087	cpd:C06999	map04976 Bile secretion	HMDB0005030	--	Benzenoids	Benzene and substituted derivatives	Diphenylmethanes	--	--	--	No results	No results	Full match	720856	585210	586298	1.40673e+06	501905	880721	1.15617e+06	1.41014e+06	1.11542e+06	1.2478e+06	1.60822e+06	1.20574e+06	0.6046	-0.725946	0.0128984	0.888889	1.39994	down
Com_1013_neg	Docosatrienoic Acid	--	C22 H38 O2	334.287	14.941	--	--	HMDB0002823	--	Lipids and lipid-like molecules	Fatty Acyls	Fatty acids and conjugates	--	--	--	Full match	No results	No results	1.1082e+07	1.76036e+07	2.54625e+07	1.47058e+07	1.45086e+07	2.03091e+07	7.39108e+06	1.19731e+07	1.18057e+07	1.17023e+07	1.01908e+07	1.21251e+07	1.59035	0.669343	0.0130991	0.888889	1.30046	up	高
Com_2706_neg	FAHFA (16:1/18:3)	--	C34 H58 O4	530.432	14.237	--	--	--	--	--	--	--	--	--	--	No results	Full match	No results	940475	996105	867779	1.46187e+06	1.16573e+06	1.42026e+06	1.13829e+06	2.85437e+06	1.62289e+06	5.17556e+06	2.4619e+06	3.33664e+06	0.413042	-1.27564	0.0134645	0.916667	1.33007	down
Com_4120_neg	Dodecanedioic acid	Dodecanedioic acid	C12 H22 O4	230.152	9.795	cpd:C02678	--	HMDB0000623	LMFA01170009	Lipids and lipid-like molecules	Fatty Acyls	Fatty acids and conjugates	Fatty Acyls [FA]	Fatty Acids and Conjugates [FA01]	Dicarboxylic acids [FA0117]	Full match	No results	No results	2.77105e+06	2.20737e+06	1.55171e+06	606022	2.67913e+06	1.23216e+06	745810	562110	844933	691833	624690	724924	2.63392	1.39721	0.0140715	0.861111	1.57649	up
Com_294_neg	2,3-dinor Prostaglandin E1	--	C18 H30 O5	308.199	12.536	--	--	--	--	--	--	--	--	--	--	Invalid mass	No results	No results	1.16201e+08	7.51476e+07	3.73468e+07	8.97086e+06	102128299	2.46669e+07	4.7781e+06	7.89851e+06	2.28072e+07	1.2934e+07	6.40019e+06	1.67769e+07	5.09061	2.34784	0.0142265	0.916667	1.48552	up
Com_883_neg	Adenine	Adenine; 6-Aminopurine	C5 H5 N5	135.054	6.117	cpd:C00147	map00230 Purine metabolism;map01100 Metabolic pathways	HMDB0000034	--	Organoheterocyclic compounds	Imidazopyrimidines	Purines and purine derivatives	--	--	--	No results	No results	Full match	986504	971249	965334	896805	1.11399e+06	857577	4.39162e+06	998509	3.33116e+07	1.20579e+07	2.87959e+06	2.17745e+07	0.0767958	-3.70283	0.014768	0.972222	1.57028	down
Com_248_neg	PC (16:0/20:5)	--	C44 H78 N O8 P	839.569	16.162	--	--	--	LMGP01010633	--	--	--	Glycerophospholipids [GP]	Glycerophosphocholines [GP01]	Diacylglycerophosphocholines [GP0101]	No results	Invalid mass	No results	8.06676e+07	6.36846e+07	6.82133e+07	3.39952e+07	7.38012e+07	5.94723e+07	1.39209e+08	6.49867e+07	1.4158e+08	8.56108e+07	9.33687e+07	1.09897e+08	0.598492	-0.740595	0.015398	0.916667	1.49647	down
Com_1152_neg	L-Cysteine-S-sulfate	--	C3 H7 N O5 S2	200.977	1.213	--	--	--	--	--	--	--	--	--	--	Full match	Full match	Full match	2.15791e+07	1.066e+07	2.73174e+06	2.91277e+06	1.46097e+07	3.27502e+06	1.5592e+06	1.49182e+06	1.57999e+06	2.92451e+06	1.50807e+06	2.0376e+06	5.02364	2.32873	0.0156637	0.944444	1.37647	up
Com_3145_neg	8-iso-15-keto Prostaglandin E2	--	C20 H30 O5	332.199	11.377	--	--	--	--	--	--	--	--	--	--	Invalid mass	No results	No results	4.71193e+06	2.78056e+06	550009	98143.5	3.842e+06	377919	82434	45204.5	308057	134221	66774.6	199725	14.778	3.88538	0.0161417	0.916667	1.34645	up
Com_1359_neg	acetoacetate	Acetoacetate; 3-Oxobutanoic acid; beta-Ketobutyric acid; Acetoacetic acid	C4 H6 O3	102.032	1.422	cpd:C00164	map00072 Synthesis and degradation of ketone bodies;map00280 Valine, leucine and isoleucine degradation;map00310 Lysine degradation;map00350 Tyrosine metabolism;map00640 Propanoate metabolism;map00650 Butanoate metabolism;map01100 Metabolic pathways	HMDB0000060	--	Organic acids and derivatives	Keto acids and derivatives	Short-chain keto acids and derivatives	--	--	--	No results	No results	Full match	5.69255e+06	1.26029e+07	1.49417e+07	7.12232e+06	7.55451e+06	1.04289e+07	1.71769e+07	1.38211e+07	1.78402e+07	1.48951e+07	14644400	1.49356e+07	0.625237	-0.677525	0.0168228	0.888889	1.43433	down
Com_1047_neg	Hexanoylglycine	--	C8 H15 N O3	173.105	8.034	--	--	HMDB0000701	--	Organic acids and derivatives	Carboxylic acids and derivatives	Amino acids, peptides, and analogues	--	--	--	Full match	No results	No results	1.54576e+06	2.4639e+06	3.13973e+06	1.40115e+07	2.03644e+06	8.31538e+06	1.31932e+07	1.90941e+07	1.29679e+07	6.8679e+06	1.66905e+07	9.77346e+06	0.400991	-1.31836	0.0178413	0.861111	1.37587	down
Com_399_neg	LPE 20:3	--	C25 H46 N O7 P	503.302	14.713	--	--	--	LMGP02050066	--	--	--	Glycerophospholipids [GP]	Glycerophosphoethanolamines [GP02]	Monoacylglycerophosphoethanolamines [GP0205]	No results	Full match	No results	2.89406e+07	2.64303e+07	2.26794e+07	5.85511e+07	2.99485e+07	3.76638e+07	4.78229e+07	6.27425e+07	4.69152e+07	4.80701e+07	5.48428e+07	4.68265e+07	0.664715	-0.589193	0.0194338	0.861111	1.36793	down
Com_2963_neg	11-Deoxy prostaglandin F2β	--	C20 H34 O4	338.246	12.092	--	--	--	--	--	--	--	--	--	--	Full match	No results	No results	1.54832e+06	2.97179e+06	4.55184e+06	1.67685e+06	2.36361e+06	3.09873e+06	1.93088e+06	1.48741e+06	500362	1.35938e+06	1.75748e+06	970369	2.02491	1.01786	0.0208837	0.888889	1.05635	up
Com_2189_neg	3-Indoleacrylic acid	--	C11 H9 N O2	187.063	8.195	--	--	HMDB0000734	--	Organoheterocyclic compounds	Indoles and derivatives	Indoles	--	--	--	No results	No results	Full match	8.52696e+06	6.474e+06	4.43716e+06	1.32339e+06	7.82642e+06	2.9465e+06	1.52116e+06	2.01036e+06	1.58738e+06	1.8662e+06	1.52028e+06	1.76509e+06	3.0704	1.61843	0.0210664	0.833333	1.2733	up
Com_5658_neg	Indoleacetic acid	Indole-3-acetate; Indole-3-acetic acid; (Indol-3-yl)acetate; Indoleacetate; Indoleacetic acid; IAA	C10 H9 N O2	175.063	6.207	cpd:C00954	map00380 Tryptophan metabolism;map01100 Metabolic pathways	HMDB0000197	--	Organoheterocyclic compounds	Indoles and derivatives	Indolyl carboxylic acids and derivatives	--	--	--	No results	No results	Full match	1.48258e+06	1.25184e+06	834703	577747	1.02176e+06	709569	608471	468333	820755	534307	437702	647361	1.6714	0.741061	0.0212519	0.888889	1.17893	up
Com_2027_neg	D-Sedoheptulose 7-phosphate	Sedoheptulose 7-phosphate; D-Sedoheptulose 7-phosphate; D-altro-Heptulose 7-phosphate; altro-Heptulose 7-phosphate	C7 H15 O10 P	290.04	1.182	cpd:C05382	map00030 Pentose phosphate pathway;map01100 Metabolic pathways;map01200 Carbon metabolism;map01230 Biosynthesis of amino acids	HMDB0001068	--	Organic oxygen compounds	Organooxygen compounds	Carbohydrates and carbohydrate conjugates	--	--	--	Full match	Full match	No results	3.93857e+06	6.30471e+06	9.2565e+06	3.63642e+06	5.32199e+06	6.26883e+06	4.87178e+06	2.10446e+06	1.49301e+06	3.07171e+06	3.88209e+06	3.62725e+06	1.82291	0.866245	0.0213839	0.916667	1.35157	up
Com_217_neg	Taurochenodeoxycholic acid	Taurochenodeoxycholate; Taurochenodeoxycholic acid; Chenodeoxycholoyltaurine	C26 H45 N O6 S	499.298	11.396	cpd:C05465	map00120 Primary bile acid biosynthesis;map04976 Bile secretion;map04979 Cholesterol metabolism	HMDB0000951	LMST05040005	Lipids and lipid-like molecules	Steroids and steroid derivatives	Bile acids, alcohols and derivatives	Sterol Lipids [ST]	Steroid conjugates [ST05]	Taurine conjugates [ST0504]	Full match	No results	Full match	1.53952e+08	7.69492e+07	2.77548e+06	5.54422e+06	1.30726e+08	4.11176e+06	891628	1.24351e+06	8.33947e+06	895626	1.02189e+06	4.18644e+06	22.5628	4.49587	0.0220744	0.861111	1.26442	up
Com_545_neg	2-Hydroxycaproic acid	--	C6 H12 O3	132.079	3.658	--	--	HMDB0001624	--	Lipids and lipid-like molecules	Fatty Acyls	Fatty acids and conjugates	--	--	--	Full match	Full match	Full match	2.66639e+07	4.14134e+07	5.21686e+07	1.7272e+07	3.56869e+07	3.6681e+07	1.67528e+07	2.13892e+07	24219920	1.62086e+07	1.89224e+07	2.36717e+07	1.73224	0.792636	0.0223704	0.888889	1.18972	up
Com_2137_neg	L-Asparagine	L-Asparagine; 2-Aminosuccinamic acid	C4 H8 N2 O3	132.053	1.246	cpd:C00152	map00250 Alanine, aspartate and glutamate metabolism;map00970 Aminoacyl-tRNA biosynthesis;map01100 Metabolic pathways;map01230 Biosynthesis of amino acids;map04974 Protein digestion and absorption;map04978 Mineral absorption;map05230 Central carbon metabolism in cancer	HMDB0000168	--	Organic acids and derivatives	Carboxylic acids and derivatives	Amino acids, peptides, and analogues	--	--	--	No results	No results	Full match	8.8586e+06	4.07593e+06	3.80182e+06	5.57139e+06	5.1875e+06	4.15996e+06	3.40123e+06	2.81349e+06	4.41681e+06	3.34965e+06	2.60394e+06	3.63615e+06	1.56544	0.646569	0.0224614	0.916667	1.22345	up
Com_6445_neg	(+/-)-Equol	--	C15 H14 O3	242.095	10.831	--	--	--	--	--	--	--	--	--	--	No results	No results	Full match	1.01224e+06	624564	330447	386352	925800	315078	341145	278925	330015	209875	295579	227033	2.1363	1.09511	0.0246776	0.916667	1.48195	up
Com_4958_neg	6β-Prostaglandin I1	--	C20 H34 O5	354.241	11.482	--	--	--	--	--	--	--	--	--	--	Full match	No results	Full match	1.15039e+06	1.57783e+06	1.93199e+06	834956	1.38816e+06	1.41927e+06	653784	660600	1.40478e+06	774891	759591	1.09621e+06	1.55193	0.634066	0.0259474	0.888889	1.29161	up
Com_1317_neg	Delta-Tridecalactone	--	C13 H24 O2	212.178	13.453	--	--	--	--	--	--	--	--	--	--	No results	No results	Full match	1.80841e+07	1.26311e+07	7.66679e+06	1.28931e+07	1.57049e+07	1.05382e+07	7.01265e+06	6.71716e+06	1.29265e+07	7.56673e+06	7.05528e+06	9.81383e+06	1.51722	0.601434	0.0305332	0.861111	1.34955	up
Com_332_neg	Hydrocinnamic acid	--	C9 H10 O2	150.068	8.167	--	--	HMDB0000764	--	Phenylpropanoids and polyketides	Phenylpropanoic acids	_	--	--	--	Full match	No results	Full match	9.85763e+07	5.11511e+07	6.41568e+06	9.98803e+06	8.10234e+07	8.73452e+06	6.45051e+06	6.71247e+06	7.06674e+06	3.60735e+06	6.73151e+06	5.31499e+06	7.13109	2.83412	0.0341141	0.888889	1.521	up
Com_3717_neg	acetyl phospahte	--	C2 H5 O5 P	139.987	1.171	--	--	--	--	--	--	--	--	--	--	No results	No results	Full match	2.28312e+06	1.56327e+06	1.82507e+06	925277	1.88149e+06	1.57786e+06	3.06551e+06	1.74026e+06	3.25725e+06	1.74773e+06	2.25681e+06	3.55825e+06	0.643557	-0.63586	0.0364789	0.805556	1.19111	down
Com_2776_neg	Dl-P-Hydroxyphenyl lactic acid	--	C9 H10 O4	182.058	1.347	--	--	--	--	--	--	--	--	--	--	No results	No results	Full match	5.52011e+06	4.37784e+06	5.08732e+06	2.25542e+06	5.45651e+06	4.68744e+06	3.04392e+06	2.9187e+06	2.99287e+06	2.85872e+06	3.38507e+06	2.7193e+06	1.52828	0.61191	0.0371844	0.833333	1.40985	up
Com_7146_neg	Taurodeoxycholic acid sodium salt	--	C26 H44 N Na O6 S	521.278	11.418	--	--	HMDB0000896	--	Lipids and lipid-like molecules	Steroids and steroid derivatives	Bile acids, alcohols and derivatives	--	--	--	No results	No results	Full match	621413	379541	26950.3	54846.4	616700	57759.9	30814.1	24981.9	85397.6	21384.5	26743.1	25737.8	8.17082	3.03048	0.0389243	0.888889	1.24586	up
Com_255_neg	Erucic acid	Erucic acid; (13Z)-Docosenoic acid; cis-13-Docosenoic acid	C22 H42 O2	338.319	15.503	cpd:C08316	map01040 Biosynthesis of unsaturated fatty acids	HMDB0002068	--	Lipids and lipid-like molecules	Fatty Acyls	Fatty acids and conjugates	--	--	--	Full match	No results	Full match	3.91174e+07	6.78845e+07	9.2866e+07	8.8769e+07	5.53744e+07	9.83341e+07	3.55892e+07	6.10905e+07	4.4649e+07	5.01813e+07	4.84412e+07	4.4278e+07	1.5563	0.638118	0.0409293	0.833333	1.12915	up
Com_6950_neg	Equol	Equol	C15 H14 O3	242.094	9.395	cpd:C14131	--	HMDB0141948	LMPK12080003	Phenylpropanoids and polyketides	Isoflavonoids	O-methylated isoflavonoids	Polyketides [PK]	Flavonoids [PK12]	Isoflavans [PK1208]	Full match	No results	Full match	763754	458976	246586	482180	627790	317589	400957	285863	250393	120886	365932	202262	1.78127	0.832909	0.0412946	0.833333	1.30044	up
Com_5237_neg	2-Mercaptobenzothiazole	2-Mercaptobenzothiazole; Captax	C7 H5 N S2	166.986	9.754	cpd:C14437	--	HMDB0030524	--	Organoheterocyclic compounds	Benzothiazoles	_	--	--	--	Full match	No results	No results	584329	468321	386958	1.45842e+06	378095	861685	588402	385485	52354.3	101039	480537	71379.5	2.46416	1.3011	0.0429603	0.777778	1.21066	up
Com_5412_neg	N1-(4-chlorophenyl)-3-(1H-pyrrol-1-ylmethyl)piperidine-1-carboxamide	--	C17 H20 Cl N3 O	317.13	11.475	--	--	--	--	--	--	--	--	--	--	Full match	No results	No results	969981	597071	193117	462732	810599	334899	1.2467e+06	1.02595e+06	538915	1.1034e+06	1.22862e+06	824118	0.564439	-0.825111	0.0432604	0.888889	1.14404	down
Com_1853_neg	Jasmonic acid	(-)-Jasmonic acid; Jasmonic acid; {(1R,2R)-3-Oxo-2-[(Z)pent-2-enyl]cyclopent-2-enyl}acetic acid; Jasmonate; (-)-Jasmonate	C12 H18 O3	210.126	12.191	cpd:C08491	map00592 alpha-Linolenic acid metabolism;map01100 Metabolic pathways	HMDB0032797	LMFA02020001	Lipids and lipid-like molecules	Fatty Acyls	Lineolic acids and derivatives	Fatty Acyls [FA]	Octadecanoids [FA02]	Jasmonic acids [FA0202]	Full match	No results	No results	1.10562e+07	6.91408e+06	2.6235e+06	5.27097e+06	9.91511e+06	3.89629e+06	2.07088e+06	2.4393e+06	5.56189e+06	2.92455e+06	2.48846e+06	4.19314e+06	2.01625	1.01167	0.0432817	0.833333	1.3878	up
Com_358_neg	ethyl 3-cyano-2-hydroxy-6-phenylisonicotinate	--	C15 H12 N2 O3	268.081	3.609	--	--	--	--	--	--	--	--	--	--	Invalid mass	No match	No match	343857	547268	723875	5.21145e+06	429564	1.27996e+06	7.69115e+06	332352	9.32548e+07	3.16543e+07	1.79947e+06	6.12801e+07	0.0435482	-4.52124	0.0433804	0.805556	1.15618	down
