# Supplementary material for: Shenkang Injection for Treating Renal Fibrosis-Metabonomics and Regulation of E3 Ubiquitin Ligase Smurfs on TGF-β/Smads Signal Transduction
Source: Front Pharmacol. 2022 Jun 2;13:849832. doi: 10.3389/fphar.2022.849832 (PMC9201572; doi:10.3389/fphar.2022.849832)
Supplement: Supplementary file 5 [file Table4.XLSX]

## Sheet: 免疫组化
COL-I	Sham	UUO	SKI-H	SKI-M	SKI-L
	0.1876	0.6039	0.3935	0.4526	0.4989
	0.1862	0.6268	0.3233	0.4831	0.5639
	0.1837	0.7438	0.3568	0.4765	0.5425
COL-III	Sham	UUO	SKI-H	SKI-M	SKI-L
	0.2638	0.6824	0.3137	0.4039	0.5338
	0.2451	0.7027	0.3354	0.4444	0.4641
	0.2679	0.7027	0.3488	0.4241	0.499
α-SMA	Sham	UUO	SKI-H	SKI-M	SKI-L
	0.085	0.5891	0.2583	0.4101	0.4495
	0.1647	0.6321	0.2736	0.4369	0.4728
	0.1117	0.666	0.2481	0.3364	0.579
E-cad	Sham	UUO	SKI-H	SKI-M	SKI-L
	0.7108	0.2941	0.6501	0.6046	0.5372
	0.7243	0.3087	0.5884	0.5872	0.5188
	0.7371	0.324	0.5774	0.5735	0.5026
Vimentin	Sham	UUO	SKI-H	SKI-M	SKI-L
	0.0918	0.5364	0.3295	0.4185	0.4223
	0.1323	0.5655	0.2876	0.3681	0.4373
	0.1002	0.605	0.3037	0.395	0.4493
TβR-I	Sham	UUO	SKI-H	SKI-M	SKI-L
	0.0651	0.5428	0.3014	0.3636	0.365
	0.0847	0.5808	0.2338	0.3	0.4226
	0.1192	0.6183	0.1829	0.2498	0.5055
Smurf1	Sham	UUO	SKI-H	SKI-M	SKI-L
	0.4305	0.1512	0.5265	0.4756	0.2047
	0.3825	0.1872	0.5419	0.4003	0.2799
	0.3725	0.0936	0.5006	0.3393	0.3655
Smurf2	Sham	UUO	SKI-H	SKI-M	SKI-L
	0.3798	0.2599	0.3861	0.3894	0.3607
	0.2795	0.1923	0.4344	0.4228	0.3377
	0.3482	0.1463	0.4768	0.329	0.3128
Ub	Sham	UUO	SKI-H	SKI-M	SKI-L
	0.1758	0.2755	0.5333	0.3018	0.3121
	0.2054	0.2057	0.5094	0.3871	0.2678
	0.1541	0.2631	0.4667	0.4193	0.2705

## Sheet: Masson
假手术组	UUO组	SKI-H	SKI-M	SKI-L
5.01	54.18	14.8	23.81	35.77
6.32	58.33	17.32	26.33	38.12
7.01	55.5	15.54	24.2	33.69
