# Supplementary material for: Shenkang Injection for Treating Renal Fibrosis-Metabonomics and Regulation of E3 Ubiquitin Ligase Smurfs on TGF-β/Smads Signal Transduction
Source: Front Pharmacol. 2022 Jun 2;13:849832. doi: 10.3389/fphar.2022.849832 (PMC9201572; doi:10.3389/fphar.2022.849832)
Supplement: Supplementary file 6 [file Table1.XLSX]

## Sheet: Sheet1
体重
	假手术组
造模前	20	20.5	21	21.9	21.1	20.9	22	22
造模后第三天	19.8	21.3	22.9	22.7	20.9	20.4	22.3	22.1
给药第一天	21.1	21.6	22.5	23.9	21.6	21.7	23.3	21.6
给药第十天	21.2	22.4	23.9	25.3	22.6	21.9	25.1	23.4
	UUO
造模前	21	22	20	18	19	20	20	21
造模后第三天	20.4	23.2	21.2	20.2	20.8	22.4	21.3	23
给药第一天	20.2	22	19.4	18.8	19.8	20.5	19	18.9
给药第十天	21.8	22.6	21.2	19.4	21	21.3	20.8	21.9
造模前	SKI
造模后第三天	20	20	22	21	20	21	20	21
给药第一天	21.9	19.5	23.1	21.5	22.7	22	21.2	22.3
给药第十天	20	18.5	19.3	20.1	20.1	18.9	19.4	19.9
	Losartan
造模前	21	22	20	20	19	19	21	20
造模后第三天	22	22.9	21.4	20	18.9	20.2	21.8	19.7
给药第一天	21.7	18.9	23.1	19.9	18.4	20.3	21.8	21.4
给药第十天	23.1	22.1	23.8	21.8	20.7	20.1	22.5	22.8
尿素氮
	Sham	UUO	SKI	Losartan
	0.156	0.217	0.172	0.182
	0.176	0.201	0.17	0.182
	0.157	0.23	0.193	0.189
	0.176	0.202	0.186	0.196
肌酐
	Sham	UUO	SKI	Losartan
	18.23	22.6	19.03	20.94
	17.09	22.51	18.64	20.65
	18.64	23.27	20.85	18.94
	18.51	22.37	20.34	19.08

## Sheet: 5组
Date/Group	Sham								UUO								SKI-H								SKI-M								SKI-L
0	20	20.5	21	20.9	21.1	20.9	20.33	20.42	21	21.32	21.25	19.21	19.98	20.03	21.36	21	21.03	19.69	21.81	20.98	21.01	19.89	20.31	21.12	21.25	20.98	20.02	20.78	20.36	19.68	21.37	20.29	20.8	21.8	21.8	19.12	19.37	20.75	20.43	20.94
3	19.8	21.3	22.9	22.7	20.9	20.4	22.3	22.1	20.4	22.2	21.2	20.2	20.8	22.4	21.3	23	22.03	19.16	22.31	20.98	21.71	21.36	21.12	22.43	22.01	21.9	21.03	20.98	19.9	20.12	21.88	19.82	21.12	22.32	20.89	20.03	20.07	20.4	20.3	20.12
7	21.1	21.6	22.5	23.9	21.6	21.7	23.3	21.6	20.2	22	19.4	18.8	19.8	20.5	19	18.9	21	18.36	21.46	20.24	21.21	20.52	20.48	21.71	21.7	19.9	22.1	19.9	20.4	20.38	22.32	21.4	22.32	22.17	21.21	20.33	20.79	21.03	19.84	19.91
14	21.2	22.4	22.9	23.3	22.6	21.9	23.1	23.4	21.8	22.6	20.2	19.4	20.38	21.3	20.8	20.9	22.68	19.89	22.38	21.36	22.74	21.42	22.7	21.13	22.21	21.41	23.28	21.15	21.7	21.1	22.5	22.8	22.78	21.78	22.43	21.32	21.14	21.41	20.72	20.03
