# Supplementary material for: Shenkang Injection for Treating Renal Fibrosis-Metabonomics and Regulation of E3 Ubiquitin Ligase Smurfs on TGF-β/Smads Signal Transduction
Source: Front Pharmacol. 2022 Jun 2;13:849832. doi: 10.3389/fphar.2022.849832 (PMC9201572; doi:10.3389/fphar.2022.849832)
Supplement: Supplementary file 7 [file Table8.XLS]

## Sheet: Cell
TGF-β1	CON	TGF-β1	SKI-H	SKI-M	SKI-L
	0.925764	3.05531	0.840042	1.56017	1.27375
	0.54791	2.91308	1.30973	1.40682	2.29063
	0.846187	2.38221	0.78275	1.04243	1.10119
TβR-I	CON	TGF-β1	SKI-H	SKI-M	SKI-L
	0.694823	1.66437	0.965715	1.27248	1.50658
	0.736434	1.91045	0.992177	1.20455	1.65515
	0.893622	1.91283	0.837758	1.2543	1.5343
TβR-II	CON	TGF-β1	SKI-H	SKI-M	SKI-L
	0.761337	1.22361	0.53029	0.92987	0.689217
	0.540254	1.95095	0.418547	0.62674	0.698443
	0.740242	1.46955	0.613106	0.565664	0.933944
P-Smad2/3	CON	TGF-β1	SKI-H	SKI-M	SKI-L
	0.364048	1.27435	0.722287	0.745249	0.373593
	0.441289	1.2242	0.735922	0.700781	0.432785
	0.734515	1.03118	0.645043	0.653113	0.770585
Smad7	CON	TGF-β1	SKI-H	SKI-M	SKI-L
	3.51356	1.00686	2.48906	1.77157	1.57837
	2.83015	0.991534	2.76922	1.6337	1.76
	2.6135	0.879976	2.51305	1.87308	1.56029
Smurf1	CON	TGF-β1	SKI-H	SKI-M	SKI-L
	1.97816	0.665243	1.68763	1.39409	1.5093
	1.8878	0.838543	1.34171	1.26285	1.28387
	1.76488	0.909355	1.63563	1.52979	1.08205
Smurf2	CON	TGF-β1	SKI-H	SKI-M	SKI-L
	0.634131	0.270635	0.967382	0.821609	0.784163
	0.632748	0.320678	1.05088	0.63322	0.722465
	0.511256	0.088381	0.817036	0.644706	0.408045

## Sheet: Animal
TGF-β1	Sham	UUO	SKI-H	SKI-M	SKI-L
	0.249164	0.980864	0.510872	0.226945	0.588117
	0.175417	1.04928	0.304751	0.190197	0.386108
	0.314692	1.03509	0.699049	0.426075	0.773422
	0.345345	1.21826	0.670471	0.439242	0.820083
	0.142353	0.916549	0.16954	0.197	0.552747
	0.158326	0.669353	0.126609	0.112482	0.378104
TβR-I	Sham	UUO	SKI-H	SKI-M	SKI-L
	0.142779	0.802978	0.752114	0.703349	0.83743
	0.0922957	0.889246	0.32848	0.693299	1.19423
	0.436959	1.05156	0.847401	0.9235	1.25717
	0.644839	1.0485	0.883226	0.838277	1.10666
	0.107613	0.701631	0.19477	0.783776	1.22999
	0.240151	0.769244	0.385594	1.00518	1.03233
TβR-II	Sham	UUO	SKI-H	SKI-M	SKI-L
	0.564797	0.570395	0.474619	0.484118	0.823925
	0.319596	0.860162	0.250794	0.508619	1.0994
	0.173944	0.818998	0.643066	0.826707	0.548232
	0.283542	0.868905	0.615053	0.675462	0.471097
	0.20962	0.872024	0.437821	0.668041	0.740062
	0.232123	0.847111	0.354292	0.632976	0.709572
P-Smad2/3	Sham	UUO	SKI-H	SKI-M	SKI-L
	0.0903468	0.751691	0.55343	0.935256	0.98028
	0.10261	0.92522	0.524297	0.825868	0.874453
	0.107888	0.222205	0.121337	0.207779	0.226239
	0.110389	0.273166	0.0788308	0.177969	0.154845
	0.114793	0.473621	0.258929	0.5862	0.989451
	0.118999	0.562803	0.39962	0.661876	0.965342
Smad7	Sham	UUO	SKI-H	SKI-M	SKI-L
	1.03028	0.397739	0.871465	0.921235	1.1478
	1.08534	0.702577	0.954797	0.919654	0.987387
	0.675462	0.38926	1.03657	0.795958	0.798557
	0.897624	0.431935	1.09551	0.535171	0.78635
	0.568981	0.282691	0.876489	0.748396	1.24225
	0.693891	0.382096	1.00203	0.807707	1.30127
Smurf1	Sham	UUO	SKI-H	SKI-M	SKI-L
	1.27546	0.676064	0.687748	0.732687	0.847806
	0.83553	0.601271	0.816528	0.946711	0.927154
	0.687817	0.393932	0.892837	0.779675	0.862173
	0.743013	0.284363	1.04418	0.670125	0.884358
	0.98465	0.391319	1.02301	0.881655	0.521882
	1.12992	0.337972	1.08804	0.75997	0.71856
Smurf2	Sham	UUO	SKI-H	SKI-M	SKI-L
	0.68421	0.374461	1.00742	0.795337	0.765446
	0.857472	0.394367	1.0299	0.49695	0.731142
	1.0376	0.360786	0.988745	0.878803	0.504087
	1.09073	0.337771	1.05419	0.749345	0.706203
	0.765832	0.645453	0.96113	0.996776	0.97241
	1.04961	0.43097	1.06933	1.0068	1.08439
