# Supplementary material for: Shenkang Injection for Treating Renal Fibrosis-Metabonomics and Regulation of E3 Ubiquitin Ligase Smurfs on TGF-β/Smads Signal Transduction
Source: Front Pharmacol. 2022 Jun 2;13:849832. doi: 10.3389/fphar.2022.849832 (PMC9201572; doi:10.3389/fphar.2022.849832)
Supplement: Supplementary file 8 [file Table5.XLSX]

## Sheet: Sheet1
Interstital damage(score)	Sham	UUO	SKI-H	SKI-M	SKI-L
	0.5	3	1	2	2
	0.5	3	1	1.5	1.5
	0	3	1.5	2	1
	0.5	3	1.5	1	1.5
	0	2.5	1	1	2
	0	2.5	1	1.5	2
% of fibrotic tissue/whole tissue area	Sham	UUO	SKI-H	SKI-M	SKI-L
	5.3	51	13.3	21.36	30.33
	4.4	43	16.12	24.55	35.98
	5.1	49	8.9	2.076	28.92
	3.9	59	9.7	23.99	37.78
	4.12	44	8.7	19.06	38.44
	3.4	58	10.78	22.22	40.12
