# Supplementary material for: Shenkang Injection for Treating Renal Fibrosis-Metabonomics and Regulation of E3 Ubiquitin Ligase Smurfs on TGF-β/Smads Signal Transduction
Source: Front Pharmacol. 2022 Jun 2;13:849832. doi: 10.3389/fphar.2022.849832 (PMC9201572; doi:10.3389/fphar.2022.849832)
Supplement: Supplementary file 9 [file Table7.XLSX]

## Sheet: Sheet1
Scr	Sham	UUO	SKI-H	SKI-M	SKI-L
	18.23	23.6	19.03	20.94	21.36
	17.09	23.51	18.64	20.65	22.13
	18.64	24.27	20.85	18.94	22.34
	18.51	24.37	20.34	19.08	22.63
BUN	Sham	UUO	SKI-H	SKI-M	SKI-L
	0.156	0.247	0.172	0.182	0.201
	0.176	0.251	0.17	0.182	0.212
	0.157	0.23	0.193	0.189	0.196
	0.176	0.232	0.186	0.196	0.21
